# Supplementary material for: Quantitative Liver-Specific Protein Fingerprint in Blood: A Signature for Hepatotoxicity
Source: PubMed Central journal article supplement — Theranostics. 2014 Jan 14;4(2):215–28. doi: 10.7150/thno.7868 (PMC3900804; doi:10.7150/thno.7868), 2014-01-14
Supplement: thnov04p0215s1.pdf [file thnov04p0215s1.pdf]

## Supplemental Material

### Supplemental Figures

#### Figure S1

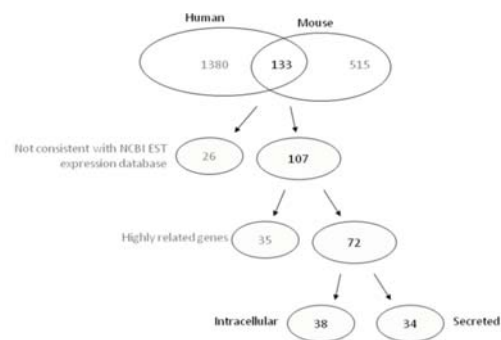

**Figure S1. Organ specificity at mRNA level and protein level.** Winnowing the liver-specific target list. Of the 133 orthologs common to human and mouse, 26 transcript MPSS expression profiles were not consistent with NCBI EST expression database, while 35 were members of closely-related gene families. Of the remaining 72, 34 are secreted proteins and 38 are intracellular proteins.

Figure S2

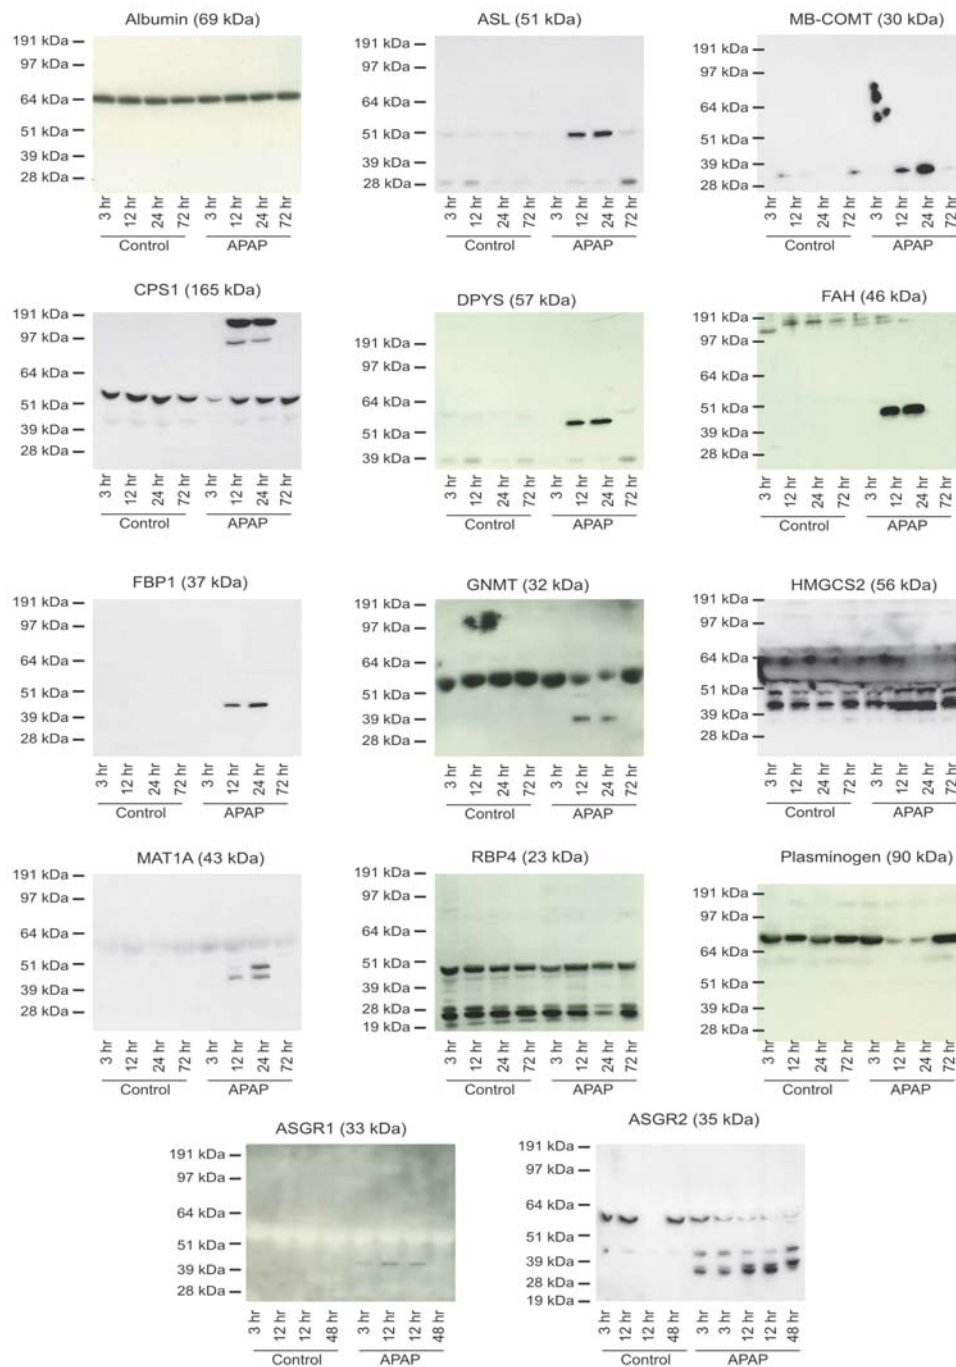

Figure S2. Western blot analyses of mouse plasma at four time points after high-dosage (300 mg/kg) APAP treatment.

**Figure S3**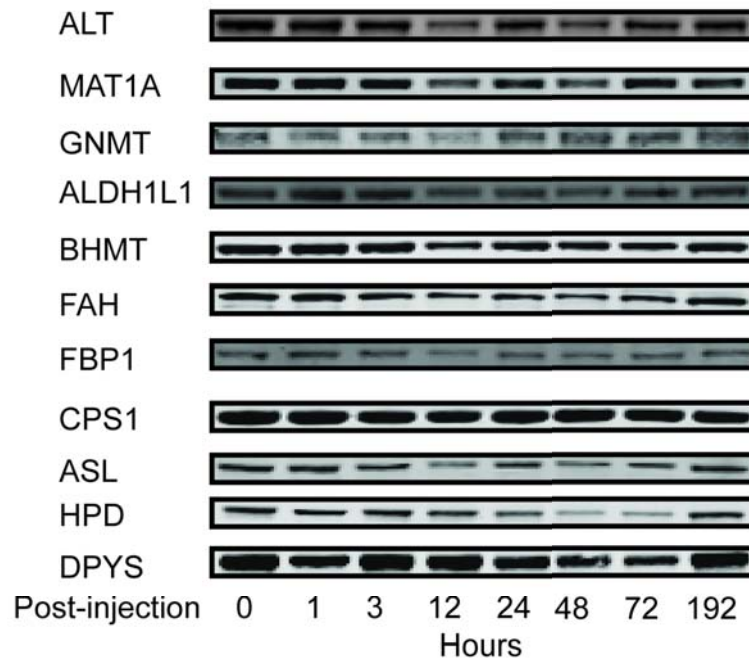

**Figure S3. Temporal profiles of liver tissue protein levels.** While these protein levels were observed to increase in the blood, Western blot analyses of mouse liver lysates indicate no change or a small decrease in level. The eight time points are taken after high-dosage (300 mg/kg) APAP treatment.

Figure S4

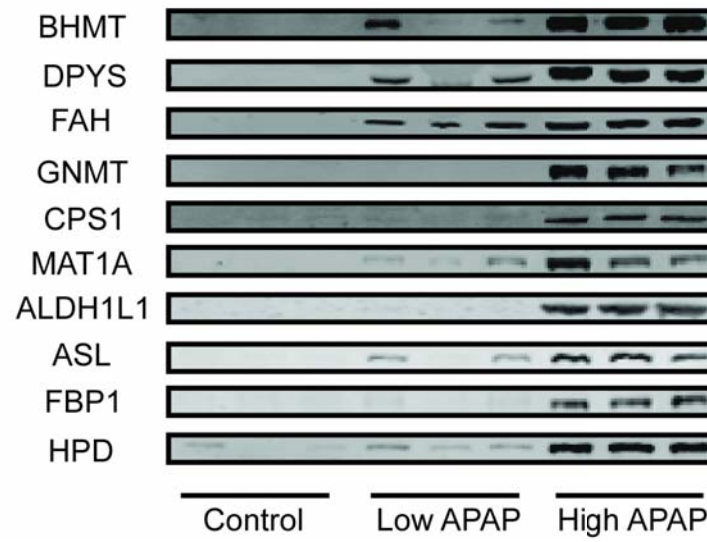

Figure S4. Western blot analyses of mouse plasma at 24 hours post low dosage (150 mg/kg) and high dosage (300 mg/kg) APAP treatment.

Figure S5

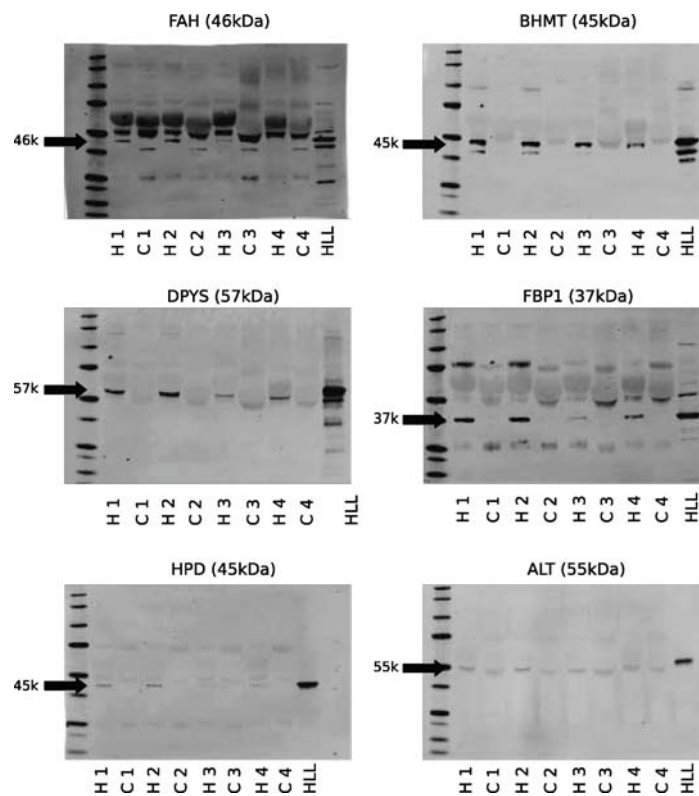

**Figure S5. Western blot analysis of human plasma.** Each blot contains plasma from four APAP hepatotoxicity patients (H1-H4), four control individuals (C1-C4), and human liver lysate (HLL).

Figure S6

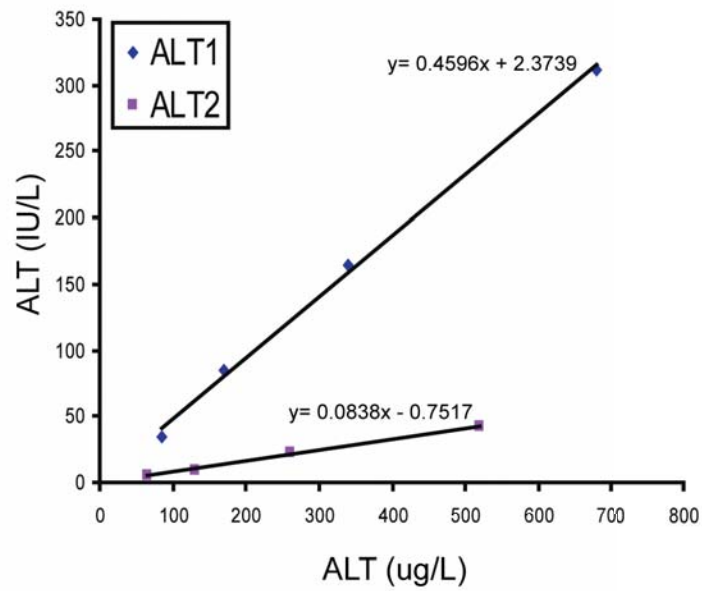

**Figure S6. Human ALT1 and ALT2 calibration.** Proteins were expressed in 293T cells, purified and quantified by the vendor (Origene, MD). Protein activities were measured by kinetic enzyme assay.

Figure S7

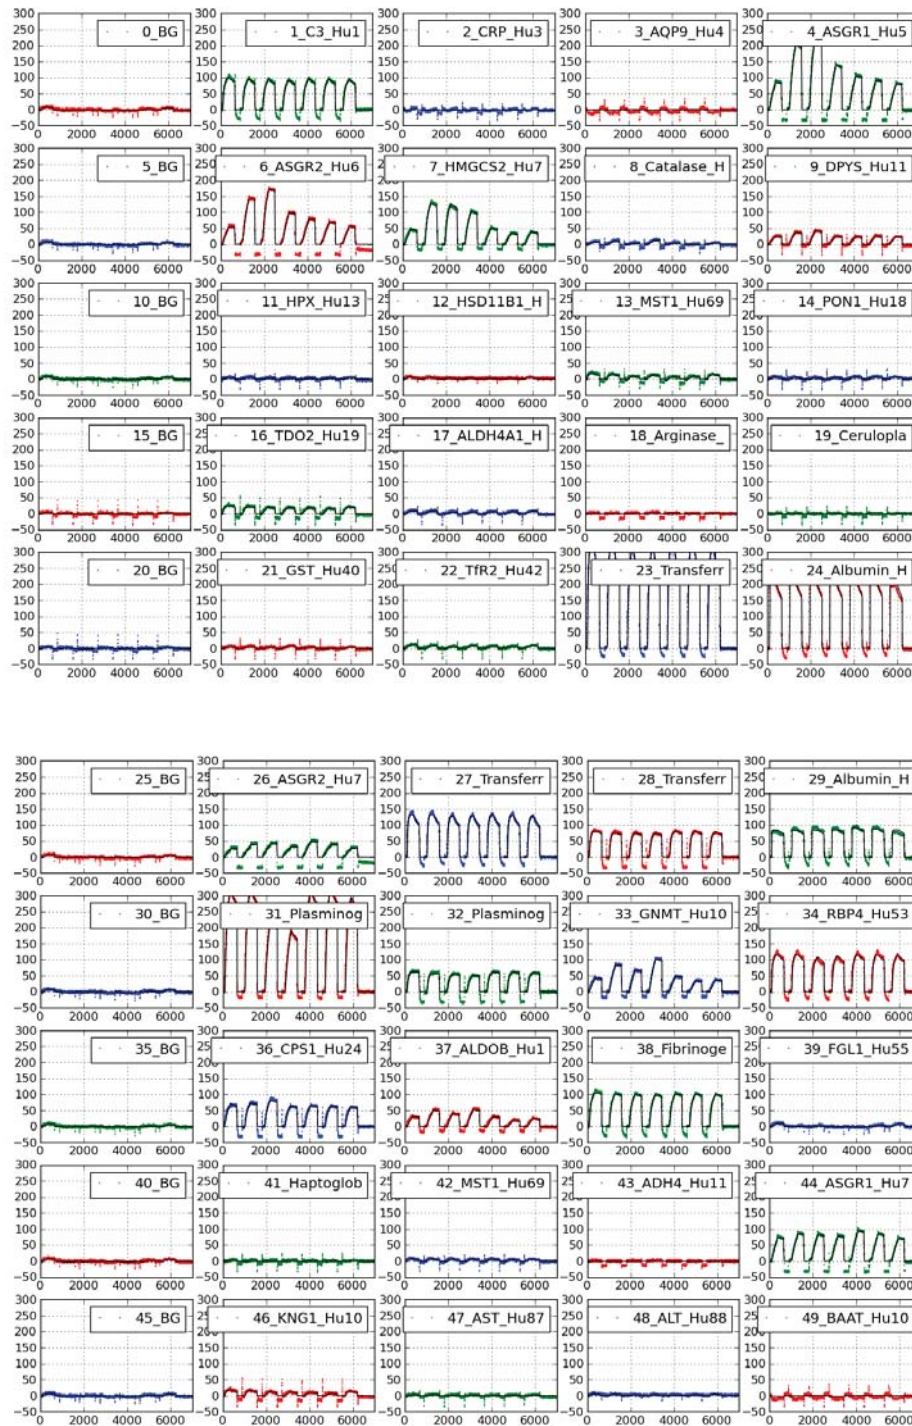

**Figure S7. SPRI sensorgrams from seven injections of plasma samples onto a fifty-feature microarray.** The sample order was 1, 3, 12, 24, 48, 72 (hours post-treatment), and control. The surface was regenerated after each injection. Black lines are fitted curves.



## Figure S8

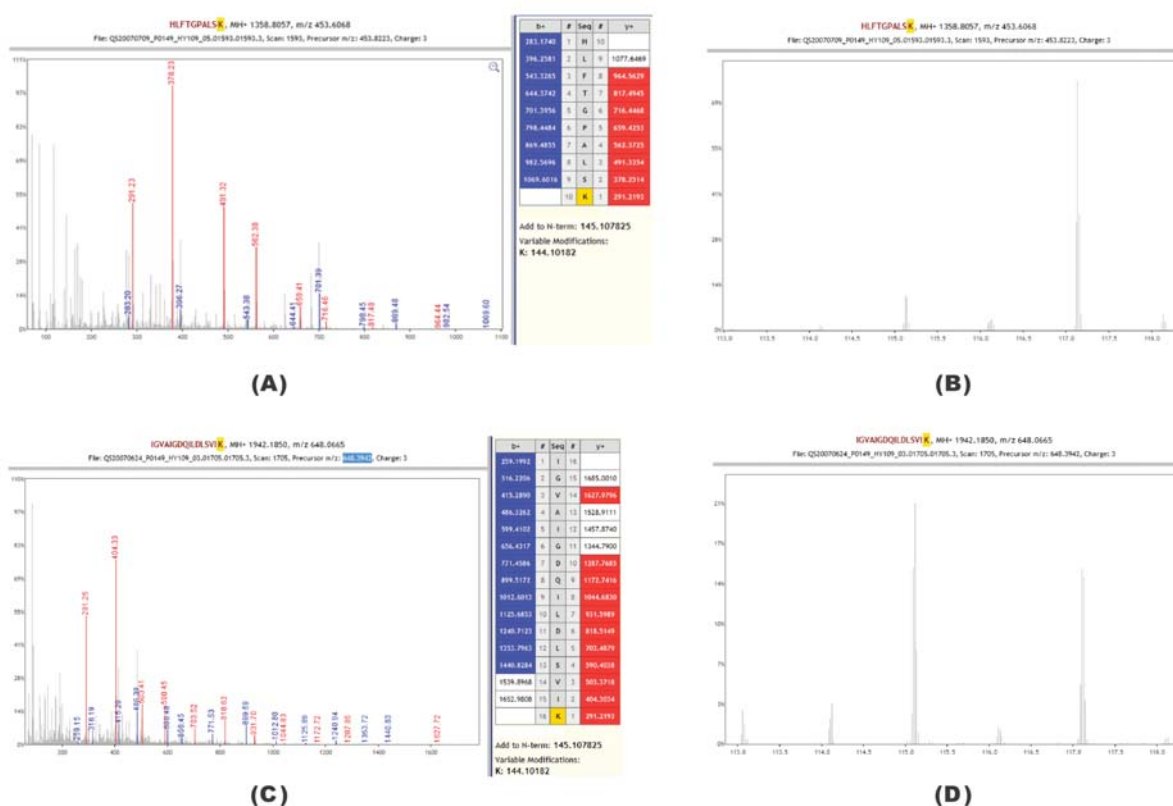

**Figure S8. Example MS2 spectra from target protein FAH in iTRAQ.** (A) The full mass range MS/MS data for the peptide HLFTGPALSK is shown as an example of high-confidence detection with targeted iTRAQ approach to quantification of FAH in blood plasma samples from mice treated with saline or APAP at 24 hours after treatment (C24 and A24), among three targeted spike-in peptides (ASLQNLLSASQAR, AHEHIFGMVLMNDWSAR, HLFTGPALSK). (B) The MS/MS data in (A) for iTRAQ reporter region of  $m/z = 113 \sim 118$ . The intensity of  $m/z=114.1$  reporter ion represent the relative level of FAH in saline-treated mouse blood while that of  $m/z=115.1$  represent FAH's relative level in APAP-treated mouse blood. (C) An MS/MS data for the peptide IGVAIGDQILDLSVIK is shown as an example of untargeted peptide for FAH, the same parent protein in the same samples as in (A). (D) The MS/MS data in (C) for iTRAQ reporter region of  $m/z = 113 \sim 118$ . Higher intensities of the target peptide HLFTGPALSK and untargeted peptide IGVAIGDQILDLSVIK in A24 sample relative to C24 sample demonstrates the feasibility and validity of targeted iTRAQ approach against the artificial contribution of peptide backbone fragments from spike-in peptides and the random contribution of iTRAQ reporter ions from co-eluting peptides. If the random contribution of co-eluting peptides was significant, the relative intensities of  $m/z=114.1$  and  $m/z=115.1$  peaks would be approximately 1:1. The peak at  $m/z=117.1$  in (D) represents iTRAQ-117.1 reporter ions of co-eluting byproduct peptides from the mixture of unpurified spike-in peptides as opposed to any spike-in target peptide. Spike-in target peptides show much higher 117.1 peaks in their MS2 data, as seen in (B), relative to untargeted peptides.



## Supplemental Tables

## Table S1. Organ-specific transcripts

Table S1A. Human MPSS data was obtained from 34 samples representing 28 different organs.

| Library ID | Organ Name                   | Description            | Company    | Race      | Gender      | Total signatures seen | Signatures for Unigene sequences | Unigene clusters |
|------------|------------------------------|------------------------|------------|-----------|-------------|-----------------------|----------------------------------|------------------|
| HuAG.basl  | adrenal gland                | none (normal tissue)   | Clontech   | Caucasian | male/female | 53768                 | 33532                            | 14078            |
| HuBl.basl  | bladder                      | none (normal tissue)   | Clontech   | Caucasian | male/female | 45291                 | 28643                            | 12363            |
| HuBM.basl  | bone marrow                  | none (normal tissue)   | Clontech   | Caucasian | male/female | 38421                 | 24079                            | 11265            |
| HuBr.amyg  | brain, amygdala              | none (normal tissue)   | Clontech   | Caucasian | male/female | 57125                 | 34160                            | 14907            |
| HuBr.CaNu  | brain, caudate nucleus       | none (normal tissue)   | Clontech   | Caucasian | male/female | 47407                 | 29060                            | 13937            |
| HuBr.cere  | brain, cerebellum            | none (normal tissue)   | Clontech   | Caucasian | male/female | 46194                 | 26447                            | 12594            |
| HuBr.CoCa  | brain, corpus callosum       | none (normal tissue)   | Clontech   | Caucasian | male/female | 54926                 | 33771                            | 14572            |
| HuBr.hypo  | brain, hypothalamus          | none (normal tissue)   | Clontech   | Caucasian | male/female | 47466                 | 29212                            | 13892            |
| HuBr.thal  | brain, thalamus              | none (normal tissue)   | Clontech   | Caucasian | male/female | 40462                 | 25997                            | 12966            |
| HuColon    | colon                        | •                      | •          | •         | •           | 20540                 | 13836                            | 8558             |
| HuFB.basl  | fetal brain, whole           | none (normal tissue)   | Clontech   | Caucasian | male/female | 42759                 | 23544                            | 12259            |
| HuHe.basl  | heart                        | none (normal tissue)   | Clontech   | Caucasian | male        | 48669                 | 33418                            | 13298            |
| HuKi.basl  | kidney                       | none (normal tissue)   | Clontech   | Caucasian | male/female | 41749                 | 26600                            | 12281            |
| HuLi.norm  | liver                        | none (normal tissue)   | •          | Asian     | male        | 12018                 | 8595                             | 6161             |
| HuLu.basl  | lung                         | none (normal tissue)   | Clontech   | Caucasian | male        | 48020                 | 30963                            | 13522            |
| HuMG.basl  | mammary gland                | none (normal tissue)   | Clontech   | Caucasian | female      | 31735                 | 21556                            | 11606            |
| HuMo.basl  | Monocytes                    | Resting                | Lynx, GmbH | •         | •           | 39813                 | 24252                            | 10800            |
| HuOv.cmts  | ovary                        | cancer cell line       | •          | •         | •           | 23725                 | 17550                            | 9404             |
| HuPB.ctrl  | peripheral blood lymphocytes | Healthy control donors | Lynx, GmbH | •         | •           | 26265                 | 17382                            | 9665             |
| HuPG.basl  | pituitary gland              | none (normal tissue)   | Clontech   | Caucasian | male/female | 46612                 | 29525                            | 13614            |
| HuPl.basl  | placenta                     | none (normal tissue)   | Clontech   | Caucasian | female      | 28913                 | 18169                            | 9758             |
| HuPn.basl  | pancreas                     | none (normal tissue)   | Clontech   | Caucasian | male/female | 24410                 | 16121                            | 9327             |
| HuPr.basl  | prostate                     | none (normal tissue)   | Clontech   | Caucasian | male        | 42969                 | 26622                            | 12716            |
| HuRe.basl  | retina                       | none (normal tissue)   | Clontech   | Caucasian | male/female | 46450                 | 28997                            | 13988            |

|           |                 |                      |          |           |             |       |       |       |
|-----------|-----------------|----------------------|----------|-----------|-------------|-------|-------|-------|
| HuSC.basl | spinal cord     | none (normal tissue) | Clontech | Caucasian | male/female | 51424 | 32718 | 14754 |
| HuSG.basl | salivary gland  | none (normal tissue) | Clontech | Caucasian | male/female | 27985 | 18472 | 10494 |
| HuSI.basl | small intestine | none (normal tissue) | Clontech | Caucasian | male/female | 52476 | 32546 | 14567 |
| HuSp.basl | spleen          | none (normal tissue) | Clontech | Caucasian | male/female | 60327 | 37295 | 14977 |
| HuSt.basl | stomach         | none (normal tissue) | Clontech | Caucasian | male/female | 26238 | 16680 | 9692  |
| HuTe.basl | testis          | none (normal tissue) | Clontech | Caucasian | male        | 80872 | 45416 | 18256 |
| HuTm.basl | thymus          | none (normal tissue) | Clontech | Caucasian | male/female | 64507 | 37260 | 15123 |
| HuTr.basl | trachea         | none (normal tissue) | Clontech | Caucasian | male/female | 52457 | 30915 | 14492 |
| HuTy.basl | thyroid         | none (normal tissue) | Clontech | Caucasian | male/female | 48125 | 31134 | 13865 |
| HuUt.basl | uterus          | none (normal tissue) | Clontech | Caucasian | female      | 66643 | 39221 | 15445 |

**Table S1B. Mouse MPSS data was obtained from 84 samples representing 31 different mouse organs.**

| Accession | Label                                                  | Organ                          | Gender | Library    | Total Signatures | Signatures for unigene sequences | Unigene clusters |
|-----------|--------------------------------------------------------|--------------------------------|--------|------------|------------------|----------------------------------|------------------|
| GSM34293  | Adrenal, Female (MoAd.Feml)                            | adrenal                        | Female | 17MoAdFeml | 22866            | 16235                            | 9546             |
| GSM44327  | Adrenal, Male (MoAd.Male)                              | adrenal                        | Male   | 17MoAdMale | 27071            | 20206                            | 10785            |
| GSM44328  | Heart:Aorta, Female (MoAo.Feml)                        | heart / aorta                  | Female | 17MoAoFeml | 21894            | 15786                            | 9407             |
| GSM38489  | Heart:Aorta, Male (MoAo.Male)                          | heart / aorta                  | Male   | 17MoAoMale | 19910            | 14341                            | 9176             |
| GSM44329  | Brown Fat, Female (MoBF.Feml)                          | brown fat                      | Female | 17MoBFFeml | 21782            | 16164                            | 9079             |
| GSM44330  | Brown Fat, Male (MoBF.Male)                            | brown fat                      | Male   | 17MoBFMale | 15077            | 11839                            | 7644             |
| GSM34294  | Bladder, Female (MoBl.Feml)                            | bladder                        | Female | 17MoBlFeml | 21465            | 14751                            | 9299             |
| GSM27138  | Bladder, Male (MoBl.Male)                              | bladder                        | Male   | 17MoBlMale | 21880            | 13436                            | 8522             |
| GSM36603  | Bone:Femur, Female (MoBn.FeFm)                         | bone / femur                   | Female | 17MoBnFeFm | 17334            | 10991                            | 7610             |
| GSM34295  | Bone:Femur, Male (MoBn.MaFm)                           | bone / femur                   | Male   | 17MoBnMaFm | 14615            | 11108                            | 7814             |
| GSM44331  | Brain:Caudate,Putamen,Accumbens, Female (MoBr.FCPA)    | brain (multi parts)            | Female | 17MoBrFCPA | 35685            | 23749                            | 11958            |
| GSM47338  | Brain:Amygdala, Female (MoBr.FeAm)                     | brain / amygdala               | Female | 17MoBrFeAm | 24660            | 17228                            | 10042            |
| GSM47339  | Brain:Cerebellum, Female (MoBr.FeCb)                   | brain / cerebellum             | Female | 17MoBrFeCb | 41376            | 26340                            | 12416            |
| GSM44334  | Brain:Cortical mantle, Female (MoBr.FeCM)              | brain / cortical mantle        | Female | 17MoBrFeCM | 35759            | 23079                            | 11797            |
| GSM47340  | Brain:Hippocampus, Female (MoBr.FeHi)                  | brain / hippocampus            | Female | 17MoBrFeHi | 35456            | 22550                            | 11535            |
| GSM44335  | Brain:Midbrain, Female (MoBr.FeMb)                     | brain / midbrain               | Female | 17MoBrFeMb | 29522            | 19660                            | 11195            |
| GSM36604  | Brain:Olfactory Bulb, Female (MoBr.FeOB)               | brain / olfactory bulb         | Female | 17MoBrFeOB | 32890            | 21735                            | 11375            |
| GSM32353  | Brain:Thalamus, Female (MoBr.FeTh)                     | brain / thalamus               | Female | 17MoBrFeTh | 37011            | 25820                            | 12521            |
| GSM38490  | Brain:Hypothalamus/preoptic area, Female (MoBr.FHyP)   | brain / hypothalamus, preoptic | Female | 17MoBrFHyP | 25935            | 17962                            | 10313            |
| GSM36721  | Brain:OlfactoryTubercle,Prefrontal, Female (MoBr.FTCS) | brain (multi parts)            | Female | 17MoBrFTCS | 29697            | 20175                            | 11035            |
| GSM34297  | Brain:Amygdala, Male (MoBr.MaAm)                       | brain / amygdala               | Male   | 17MoBrMaAm | 25075            | 15980                            | 9481             |
| GSM32354  | Brain:Cerebellum, Male (MoBr.MaCb)                     | brain / cerebellum             | Male   | 17MoBrMaCb | 36637            | 24684                            | 11927            |
| GSM44336  | Brain:Cortical mantle, Male (MoBr.MaCM)                | brain / cortical mantle        | Male   | 17MoBrMaCM | 33034            | 23166                            | 11724            |
| GSM32355  | Brain:Hippocampus, Male (MoBr.MaHi)                    | brain / hippocampus            | Male   | 17MoBrMaHi | 31883            | 22390                            | 11760            |
| GSM32356  | Brain:Midbrain, Male (MoBr.MaMb)                       | brain / midbrain               | Male   | 17MoBrMaMb | 27641            | 19783                            | 10937            |

|          |                                                             |                                |        |            |       |       |       |
|----------|-------------------------------------------------------------|--------------------------------|--------|------------|-------|-------|-------|
| GSM44337 | Brain:Olfactory Bulb, Male (MoBr.MaOB)                      | brain / olfactory bulb         | Male   | 17MoBrMaOB | 46513 | 28851 | 12948 |
| GSM38491 | Brain:Thalamus, Male (MoBr.MaTh)                            | brain / thalamus               | Male   | 17MoBrMaTh | 27922 | 19466 | 10852 |
| GSM36605 | Brain:Caudate,Putamen,Accumbens, Male (MoBr.MCPA)           | brain (multi parts)            | Male   | 17MoBrMCPA | 30007 | 20702 | 11286 |
| GSM34296 | Brain:Hypothalamus/preoptic area, Male (MoBr.MHyP)          | brain / hypothalamus, preoptic | Male   | 17MoBrMHyp | 28836 | 20476 | 10917 |
| GSM40111 | Brain:OlfactoryTubercle,Prefrontal Cortex, Male (MoBr.MTCS) | Cortex (multi parts)           | Male   | 17MoBrMTCS | 25119 | 16060 | 9732  |
| GSM40113 | Cartilage:Xiphoid, Female (MoCg.FeXi)                       | cartilage                      | Female | 17MoCgFeXi | 28448 | 15480 | 9282  |
| GSM38492 | Cartilage:Xiphoid, Male (MoCg.MaXi)                         | cartilage                      | Male   | 17MoCgMaXi | 20582 | 14895 | 9166  |
| GSM40112 | Cervix and vagina, Female (MoCV.Feml)                       | cervix / vagina                | Female | 17MoCVFeml | 14178 | 11078 | 7701  |
| GSM35331 | Esophagus, Female (MoEs.Feml)                               | esophagus                      | Female | 17MoEsFeml | 15739 | 12315 | 8289  |
| GSM27139 | Esophagus, Male (MoEs.Male)                                 | esophagus                      | Male   | 17MoEsMale | 12190 | 7999  | 5878  |
| GSM38493 | Eye, Female (MoEy.Feml)                                     | eye                            | Female | 17MoEyFeml | 31363 | 22430 | 11966 |
| GSM36606 | Eye, Male (MoEy.Male)                                       | eye                            | Male   | 17MoEyMale | 32041 | 19753 | 11152 |
| GSM40115 | Heart: atria, Female (MoHe.FeAt)                            | heart / atria                  | Female | 17MoHeFeAt | 10827 | 6819  | 5319  |
| GSM27140 | Heart:Ventricles and Septum, Female (MoHe.FeVS)             | heart / ventricles, septum     | Female | 17MoHeFeVS | 12316 | 8299  | 5874  |
| GSM40116 | Heart: atria, Male (MoHe.MaAt)                              | heart / atria                  | Male   | 17MoHeMaAt | 21133 | 14541 | 8990  |
| GSM36722 | Heart:Ventricles and Septum, Male (MoHe.MaVS)               | heart / ventricles, septum     | Male   | 17MoHeMaVS | 16475 | 11697 | 7651  |
| GSM34298 | Kidney:Cortex, Female (MoKi.FeCr)                           | kidney / cortex                | Female | 17MoKiFeCr | 17349 | 12996 | 8517  |
| GSM27141 | Kidney:Medulla, Female (MoKi.FeMd)                          | kidney / medulla               | Female | 17MoKiFeMd | 15814 | 9836  | 6809  |
| GSM27142 | Kidney:Cortex, Male (MoKi.MaCr)                             | kidney / cortex                | Male   | 17MoKiMaCr | 19361 | 13328 | 8073  |
| GSM27143 | Kidney:Medulla, Male (MoKi.MaMd)                            | kidney / medulla               | Male   | 17MoKiMaMd | 16444 | 11423 | 7180  |
| GSM40117 | Large intestine, Female (MoLI.Feml)                         | large intestine                | Female | 17MoLIFeml | 19057 | 13474 | 8711  |
| GSM47341 | Liver:right lobe, Female (MoLi.FeRL)                        | liver / right lobe             | Female | 17MoLiFeRL | 11657 | 8654  | 6030  |
| GSM36723 | Large intestine, Male (MoLI.Male)                           | large intestine                | Male   | 17MoLIMale | 11146 | 7821  | 5919  |
| GSM32357 | Liver:left lobe, Male (MoLi.MaLL)                           | liver / left lobe              | Male   | 17MoLiMaLL | 13583 | 10227 | 6790  |
| GSM36724 | Liver:right lobe, Male (MoLi.MaRL)                          | liver / right lobe             | Male   | 17MoLiMaRL | 10891 | 8177  | 5746  |
| GSM44332 | Lymph nodes: mesenteric, Female (MoLN.FeMs)                 | lymph nodes                    | Female | 17MoLNFeMs | 17248 | 12776 | 8396  |

|          |                                           |                         |        |            |       |       |       |
|----------|-------------------------------------------|-------------------------|--------|------------|-------|-------|-------|
| GSM38494 | Lymph nodes: mesenteric, Male (MoLN.MaMs) | lymph nodes             | Male   | 17MoLNMaMs | 21904 | 14691 | 8935  |
| GSM40118 | Lung, Female (MoLu.Feml)                  | lung                    | Female | 17MoLuFeml | 26627 | 18700 | 10152 |
| GSM40119 | Lung, Male (MoLu.Male)                    | lung                    | Male   | 17MoLuMale | 21377 | 15902 | 9429  |
| GSM80478 | Brain:Medulla, Female (MoMe.Feml)         | brain / medulla         | Female | 17MoMefeml | 30870 | 20296 | 11268 |
| GSM80479 | Brain:Medulla, Male (MoMe.Male)           | brain / medulla         | Male   | 17MoMemale | 33405 | 23716 | 12139 |
| GSM35332 | Mammary gland, Female (MoMG.Feml)         | mammary gland           | Female | 17MoMGFeml | 22535 | 17007 | 9886  |
| GSM34299 | Ovary, Female (MoOv.Feml)                 | ovary                   | Female | 17MoOvFeml | 32838 | 23364 | 12004 |
| GSM38495 | Pituitary, Female (MoPi.Feml)             | pituitary               | Female | 17MoPiFeml | 16972 | 12180 | 8114  |
| GSM38496 | Pituitary, Male (MoPi.Male)               | pituitary               | Male   | 17MoPiMale | 14397 | 9959  | 7149  |
| GSM44333 | Placenta - E18, Female (MoPl.FE18)        | placenta / E18          | Female | 17MoPlFE18 | 22725 | 16773 | 9788  |
| GSM80480 | Brain:Pons, Female (MoPo.Feml)            | brain / pons            | Female | 17MoPofeml | 24186 | 17750 | 10434 |
| GSM80481 | Brain:Pons, Male (MoPo.Male)              | brain / pons            | Male   | 17MoPomale | 30896 | 19257 | 10848 |
| GSM47342 | Prostate, Male (MoPr.Male)                | prostate                | Male   | 17MoPrMale | 11993 | 8458  | 6240  |
| GSM35333 | Spinal cord:entire, Female (MoSC.FeEn)    | spinal cord / entire    | Female | 17MoSCFeEn | 66524 | 28512 | 13695 |
| GSM38497 | Spinal cord:entire, Male (MoSC.MaEn)      | spinal cord / entire    | Male   | 17MoSCMaEn | 28813 | 19698 | 11243 |
| GSM40120 | Small intestine, Female (MoSI.Feml)       | small intestine         | Female | 17MoSIFeml | 22649 | 16371 | 9606  |
| GSM47343 | Small intestine, Male (MoSI.Male)         | small intestine         | Male   | 17MoSIMale | 23397 | 17529 | 9958  |
| GSM32358 | Skin:hairy, from back, Female (MoSk.FeHB) | skin / hairy from back  | Female | 17MoSkFeHB | 22175 | 15665 | 9788  |
| GSM36607 | Skin:hairy, from back, Male (MoSk.MaHB)   | skin / hairy from back  | Male   | 17MoSkMaHB | 30215 | 17440 | 10754 |
| GSM47344 | SkeletalMuscle:Thigh, Female (MoSM.FeTh)  | skeletal muscle / thigh | Female | 17MoSMFeTh | 11925 | 9411  | 6318  |
| GSM47345 | SkeletalMuscle:Thigh, Male (MoSM.MaTh)    | skeletal muscle / thigh | Male   | 17MoSMMaTh | 12372 | 10045 | 6721  |
| GSM36608 | Spleen, Female (MoSp.Feml)                | spleen                  | Female | 17MoSpFeml | 22363 | 15861 | 9491  |
| GSM47346 | Spleen, Male (MoSp.Male)                  | spleen                  | Male   | 17MoSpMale | 16483 | 11743 | 7823  |
| GSM35328 | Stomach, Female (MoSt.Feml)               | stomach                 | Female | 17MoStFeml | 18033 | 13731 | 8835  |
| GSM40121 | Testis, Male (MoTe.Male)                  | testis                  | Male   | 17MoTeMale | 24033 | 15349 | 9666  |
| GSM38498 | Thymus, Female (MoTh.Feml)                | thymus                  | Female | 17MoThFeml | 28015 | 19943 | 10852 |
| GSM36725 | Thymus, Male (MoTh.Male)                  | thymus                  | Male   | 17MoThMale | 22860 | 15426 | 9176  |
| GSM36609 | Thyroid/parathyroid, Female (MoTp.Feml)   | thyroid + parathyroid   | Female | 17MoTpFeml | 20849 | 15307 | 9482  |
| GSM38499 | Thyroid/parathyroid, Male (MoTp.Male)     | thyroid + parathyroid   | Male   | 17MoTpMale | 20391 | 15304 | 9553  |
| GSM35330 | Uterus, Female (MoUt.Feml)                | uterus                  | Female | 17MoUtFeml | 16494 | 12085 | 8260  |
| GSM35329 | Uterus:Pregnant E18, Female (MoUt.FP18)   | uterus (pregnant)       | Female | 17MoUtFP18 | 22103 | 17068 | 9999  |

|          |                               |                     |        |            |       |       |      |
|----------|-------------------------------|---------------------|--------|------------|-------|-------|------|
| GSM27144 | White fat, Female (MoWF.FeAb) | white fat / abdomen | Female | 17MoWFFeAb | 13861 | 10215 | 7085 |
| GSM32359 | White fat, Male (MoWF.MaAb)   | white fat / abdomen | Male   | 17MoWFMaAb | 23369 | 16437 | 9903 |

## Table S2. Liver-specific targets

**Table S2A. Liver-specific targets were selected based on relative gene expression levels in both human and mouse tissues.** Gene names, symbols, identification numbers, and logarithmic ratios of liver expression versus expression in other tissues are given here.

| Description                                                                                    | Gene symbol | Human gene | Log-ratio (liver / sum of all) | Log-ratio (liver / next highest) | Liver expression (tpm) | Mouse gene | Log-ratio (liver / sum of all) | Log-ratio (liver / next highest) | Liver expression (tpm) |
|------------------------------------------------------------------------------------------------|-------------|------------|--------------------------------|----------------------------------|------------------------|------------|--------------------------------|----------------------------------|------------------------|
| Alpha-1-B glycoprotein                                                                         | A1BG        | Hs.529161  | 7.01                           | 289.50                           | 1158                   | Mm.291499  | 8.41                           | 340.00                           | 340                    |
| ATP-binding cassette, sub-family C (CFTR/MRP), member 6                                        | ABCC6       | Hs.442182  | 8.60                           | 388.00                           | 388                    | Mm.63514   | 1.53                           | 3.69                             | 354                    |
| A disintegrin-like and metallopeptidase (reprolysin type) with thrombospondin type 1 motif, 13 | ADAMTS13    | Hs.131433  | 3.46                           | 13.00                            | 65                     | Mm.330084  | 4.25                           | 18.00                            | 18                     |
| Alcohol dehydrogenase 4 (class II), pi polypeptide                                             | ADH4        | Hs.1219    | 4.70                           | 38.75                            | 155                    | Mm.158750  | 5.67                           | 50.00                            | 50                     |
| Afamin                                                                                         | AFM         | Hs.168718  | 8.08                           | 270.00                           | 270                    | Mm.348786  | 3.70                           | 12.00                            | 12                     |
| Alanine-glyoxylate aminotransferase                                                            | AGXT        | Hs.144567  | 8.27                           | 336.36                           | 3700                   | Mm.7457    | 7.52                           | 182.00                           | 182                    |
| S-adenosylhomocysteine hydrolase                                                               | AHCY        | Hs.388004  | 0.95                           | 5.95                             | 113                    | Mm.330692  | 2.81                           | 17.00                            | 34                     |
| Alpha-2-HS-glycoprotein                                                                        | AHSG        | Hs.324746  | 5.75                           | 53.00                            | 53                     | Mm.197554  | 8.96                           | 497.00                           | 497                    |
| Aldo-keto reductase family 1, member C6                                                        | AKR1C6      | Hs.567245  | 6.01                           | 128.75                           | 515                    | Mm.196666  | 9.83                           | 1824.00                          | 1824                   |
| Albumin 1                                                                                      | ALB         | Hs.418167  | 10.27                          | 1236.00                          | 1236                   | Mm.16773   | 12.51                          | 5839.00                          | 5839                   |
| Aldehyde dehydrogenase 1 family, member L1                                                     | ALDH1L1     | Hs.434435  | 4.64                           | 24.00                            | 24                     | Mm.30035   | 3.17                           | 17.75                            | 71                     |
| Aldolase 2, B isoform                                                                          | ALDOB       | Hs.530274  | 6.26                           | 82.69                            | 1075                   | Mm.218862  | 4.52                           | 22.00                            | 22                     |
| Alpha 1 microglobulin/bikunin                                                                  | AMBP        | Hs.436911  | 14.06                          | 17110.00                         | 17110                  | Mm.2197    | 10.43                          | 1382.00                          | 1382                   |
| Angiotensin-like 3                                                                             | ANGPTL3     | Hs.209153  | 5.70                           | 51.00                            | 51                     | Mm.28341   | 5.64                           | 49.00                            | 49                     |
| Apolipoprotein A-V                                                                             | APOA5       | Hs.283923  | 9.31                           | 635.00                           | 635                    | Mm.29738   | 3.81                           | 13.00                            | 13                     |
| Apolipoprotein B                                                                               | APOB        | Hs.120759  | 5.78                           | 54.00                            | 54                     | Mm.221239  | 6.55                           | 93.00                            | 93                     |
| Apolipoprotein C-I                                                                             | APOC1       | Hs.110675  | 7.64                           | 198.00                           | 198                    | Mm.182440  | 1.46                           | 10.16                            | 5771                   |
| Apolipoprotein H                                                                               | APOH        | Hs.445358  | 9.12                           | 835.50                           | 1671                   | Mm.2266    | 9.50                           | 724.00                           | 724                    |
| Aquaporin 9                                                                                    | AQP9        | Hs.104624  | 1.89                           | 11.00                            | 1133                   | Mm.335570  | 5.52                           | 45.00                            | 45                     |
| Arginase                                                                                       | ARG1        | Hs.440934  | 7.28                           | 154.00                           | 154                    | Mm.154144  | •                              | 0.00                             | 0                      |
| Asialoglycoprotein receptor 1                                                                  | ASGR1       | Hs.12056   | 6.45                           | 146.00                           | 876                    | Mm.6559    | 1.67                           | 4.93                             | 1272                   |
| Asialoglycoprotein receptor 2                                                                  | ASGR2       | Hs.567238  | 2.75                           | 23.28                            | 745                    | Mm.1357    | 4.09                           | 28.90                            | 289                    |
| Argininosuccinate lyase                                                                        | ASL         | Hs.632015  | •                              | •                                | •                      | Mm.23869   | 5.88                           | 58.00                            | 58                     |
| Argininosuccinate synthetase 1                                                                 | ASS1        | Hs.160786  | 2.40                           | 11.14                            | 5314                   | Mm.3217    | 6.75                           | 107.00                           | 107                    |



|                                                        |         |           |      |        |      |           |      |        |     |
|--------------------------------------------------------|---------|-----------|------|--------|------|-----------|------|--------|-----|
| Bile acid-Coenzyme A: amino acid N-acyltransferase     | BAAT    | Hs.284712 | 4.80 | 53.00  | 530  | Mm.2859   | 5.21 | 36.00  | 36  |
| Betaine-homocysteine methyltransferase                 | BHMT    | Hs.80756  | 1.70 | 3.38   | 2876 | Mm.329582 | 9.95 | 986.00 | 986 |
| Complement component 1, r subcomponent-like            | C1RL    | Hs.567497 | 3.64 | 14.80  | 74   | Mm.132974 | 3.88 | 25.50  | 102 |
| Complement component 3                                 | C3      | Hs.529053 | 8.40 | 337.00 | 337  | Mm.19131  | 5.61 | 48.00  | 48  |
| Complement component 8, beta subunit                   | C8B     | Hs.391835 | 7.84 | 275.60 | 1378 | Mm.87072  | 2.11 | 130.00 | 130 |
| Complement factor B                                    | CFB     | Hs.69771  | 8.10 | 308.00 | 2464 | Mm.653    | 5.25 | 37.00  | 37  |
| Complement component factor h                          | CFH     | Hs.363396 | 4.78 | 82.00  | 246  | Mm.8655   | 0.18 | 3.00   | 63  |
| Procollagen, type XVIII, alpha 1                       | COL18A1 | Hs.517356 | 7.78 | 219.00 | 219  | Mm.4352   | 3.91 | 14.00  | 14  |
| Catechol-O-methyltransferase                           | COMT    | Hs.370408 | 5.78 | 165.00 | 1155 | Mm.100940 | 4.64 | 24.00  | 24  |
| Ceruloplasmin                                          | CP      | Hs.558314 | 2.77 | 17.43  | 244  | Mm.13787  | 7.04 | 131.00 | 131 |
| Carboxypeptidase B2 (plasma)                           | CPB2    | Hs.512937 | 3.76 | 19.06  | 610  | Mm.24242  | 3.86 | 15.14  | 318 |
| Carboxypeptidase N, polypeptide 2                      | CPN2    | Hs.528368 | 3.80 | 21.75  | 348  | Mm.290614 | 4.46 | 21.00  | 21  |
| Carbamoyl-phosphate synthetase 1                       | CPS1    | Hs.149252 | 6.11 | 68.00  | 68   | Mm.343942 | 3.81 | 13.00  | 13  |
| Cytochrome P450, family 27, subfamily a, polypeptide 1 | CYP27A1 | Hs.516700 | 0.52 | 8.39   | 1343 | Mm.85083  | 2.88 | 13.42  | 161 |
| Cytochrome P450, family 3, subfamily a, polypeptide 25 | CYP3A25 | Hs.306220 | 3.59 | 20.00  | 180  | Mm.301900 | 3.37 | 10.53  | 453 |
| Cytochrome P450, family 4, subfamily a, polypeptide 10 | CYP4A10 | Hs.1645   | 7.81 | 224.00 | 224  | Mm.10742  | 5.49 | 44.00  | 44  |
| Cytochrome P450, family 8, subfamily b, polypeptide 1  | CYP8B1  | Hs.447793 | 8.30 | 314.00 | 314  | Mm.20889  | 6.77 | 108.00 | 108 |
| Dihydropyrimidinase                                    | DPYS    | Hs.443161 | 5.86 | 57.00  | 57   | Mm.275974 | 4.25 | 37.00  | 37  |
| Enoyl coenzyme A hydratase 1, peroxisomal              | ECH1    | Hs.196176 | 9.51 | 730.00 | 730  | Mm.291776 | 4.86 | 28.00  | 28  |
| Coagulation factor XI                                  | F11     | Hs.1430   | 4.99 | 36.83  | 221  | Mm.33326  | 5.17 | 35.00  | 35  |
| Coagulation factor XII (Hageman factor)                | F12     | Hs.1321   | 6.69 | 102.00 | 102  | Mm.42224  | 6.09 | 67.00  | 67  |
| Fumarylacetoacetate hydrolase                          | FAH     | Hs.73875  | 3.19 | 27.17  | 163  | Mm.3798   | 5.00 | 31.00  | 31  |
| Fructose bisphosphatase 1                              | FBP1    | Hs.494496 | 1.31 | 3.58   | 455  | Mm.423078 | 5.93 | 60.00  | 60  |
| Fibrinogen, alpha polypeptide                          | FGA     | Hs.351593 | 7.85 | 230.00 | 230  | Mm.88793  | 4.95 | 30.00  | 30  |
| Fibrinogen, B beta polypeptide                         | FGB     | Hs.300774 | 5.12 | 59.87  | 6406 | Mm.30063  | 7.02 | 129.00 | 129 |
| Fibrinogen, gamma polypeptide                          | FGG     | Hs.546255 | 8.27 | 308.00 | 308  | Mm.16422  | 3.87 | 14.95  | 598 |

|                                                          |        |           |       |         |      |           |       |         |      |
|----------------------------------------------------------|--------|-----------|-------|---------|------|-----------|-------|---------|------|
| Fibrinogen-like protein 1                                | FGL1   | Hs.491143 | 3.49  | 15.19   | 1656 | Mm.277955 | 6.48  | 88.00   | 88   |
| Fibronectin 1                                            | FN1    | Hs.203717 | 2.77  | 11.17   | 67   | Mm.193099 | 2.42  | 7.50    | 15   |
| Formiminotransferase cyclodeaminase                      | FTCD   | Hs.415846 | 7.73  | 593.80  | 2969 | Mm.36278  | 6.82  | 112.00  | 112  |
| Glucose-6-phosphatase, catalytic                         | G6PC   | Hs.212293 | 5.78  | 54.00   | 54   | Mm.18064  | 4.17  | 17.00   | 17   |
| Group specific component                                 | GC     | Hs.418497 | 6.07  | 66.00   | 66   | Mm.196595 | 7.35  | 407.50  | 815  |
| Glutaryl-Coenzyme A dehydrogenase                        | GCDH   | Hs.532699 | 0.57  | 10.11   | 384  | Mm.2475   | 4.81  | 27.00   | 27   |
| Gap junction membrane channel protein beta 1             | GJB1   | Hs.333303 | 4.23  | 43.78   | 394  | Mm.21198  | -0.21 | 2.76    | 593  |
| Glutaminase 2 (liver, mitochondrial)                     | GLS2   | Hs.212606 | 7.99  | 254.00  | 254  | Mm.30102  | 4.58  | 23.00   | 23   |
| Glycine N-methyltransferase                              | GNMT   | Hs.144914 | 7.60  | 322.33  | 967  | Mm.29395  | 5.32  | 39.00   | 39   |
| G protein-coupled receptor 146                           | GPR146 | Hs.20961  | 5.00  | 31.00   | 31   | Mm.270003 | 1.48  | 7.33    | 88   |
| 3-hydroxyanthranilate 3,4-dioxygenase                    | HAAO   | Hs.368805 | 9.32  | 636.00  | 636  | Mm.30100  | 4.32  | 19.00   | 19   |
| Histidine ammonia-lyase                                  | HAL    | Hs.190783 | 3.37  | 15.00   | 30   | Mm.13000  | 0.59  | 3.86    | 135  |
| 3-hydroxy-3-methylglutaryl-CoA synthase 2                | HMGCS2 | Hs.59889  | 6.04  | 65.00   | 65   | Mm.289131 | 6.11  | 68.00   | 68   |
| Haptoglobin                                              | HP     | Hs.513711 | 6.54  | 92.00   | 92   | Mm.26730  | 0.09  | 2.61    | 300  |
| 4-hydroxyphenylpyruvic acid dioxygenase                  | HPD    | Hs.2899   | 11.68 | 3278.00 | 3278 | Mm.6584   | 3.41  | 13.02   | 4269 |
| Hemopexin                                                | HPX    | Hs.426485 | 8.92  | 482.00  | 482  | Mm.3485   | 5.90  | 122.58  | 7968 |
| Histidine-rich glycoprotein                              | HRG    | Hs.1498   | 7.27  | 153.00  | 153  | Mm.358794 | 8.79  | 664.50  | 1329 |
| Inter-alpha trypsin inhibitor, heavy chain 1             | ITIH1  | Hs.420257 | 10.04 | 1051.00 | 1051 | Mm.3227   | 1.93  | 4.50    | 18   |
| Inter-alpha trypsin inhibitor, heavy chain 2             | ITIH2  | Hs.75285  | 6.54  | 92.00   | 92   | Mm.182043 | 5.75  | 53.00   | 53   |
| Inter-alpha trypsin inhibitor, heavy chain 3             | ITIH3  | Hs.76716  | 9.03  | 522.00  | 522  | Mm.4517   | 2.17  | 8.50    | 17   |
| Ketohexokinase                                           | KHK    | Hs.567297 | 5.59  | 85.61   | 1541 | Mm.22451  | 4.52  | 22.00   | 22   |
| Kininogen 1                                              | KNG1   | Hs.77741  | 6.92  | 120.00  | 120  | Mm.2160   | 2.81  | 10.00   | 20   |
| Mannan-binding lectin serine peptidase 1                 | MASP1  | Hs.89983  | 4.82  | 37.33   | 112  | Mm.1213   | 4.17  | 17.00   | 17   |
| Methionine adenosyltransferase I, alpha                  | MAT1A  | Hs.282670 | 7.48  | 177.00  | 177  | Mm.14064  | 10.95 | 3947.00 | 3947 |
| Mannoside acetylglucosaminyltransferase 4, isoenzyme B   | MGAT4B | Hs.567419 | 5.95  | 61.00   | 61   | Mm.86759  | .     | 0.00    | 0    |
| Macrophage stimulating 1 (hepatocyte growth factor-like) | MST1   | Hs.349110 | 1.75  | 12.34   | 469  | Mm.8369   | 1.67  | 12.20   | 305  |
| Nuclear receptor subfamily 0, group B, member 2          | NR0B2  | Hs.427055 | 1.19  | 7.18    | 79   | Mm.346759 | 1.57  | 3.62    | 275  |

|                                                                                                    |           |           |       |         |      |           |      |        |       |
|----------------------------------------------------------------------------------------------------|-----------|-----------|-------|---------|------|-----------|------|--------|-------|
| Plasminogen                                                                                        | PLG       | Hs.143436 | 4.93  | 40.33   | 121  | Mm.971    | 9.51 | 726.00 | 726   |
| Paraoxonase 1                                                                                      | PON1      | Hs.370995 | 5.10  | 137.43  | 962  | Mm.237657 | 3.43 | 51.07  | 1532  |
| Retinol binding protein 4, plasma                                                                  | RBP4      | Hs.50223  | 9.70  | 830.00  | 830  | Mm.2605   | 2.23 | 16.75  | 201   |
| Ras homolog gene family, member B                                                                  | RHOB      | Hs.502876 | 2.30  | 29.18   | 496  | Mm.687    | 2.00 | 5.50   | 11    |
| Serine (or cysteine) peptidase inhibitor, clade A (alpha-1 antiproteinase, antitrypsin), member 10 | SERPINA10 | Hs.118620 | 7.20  | 146.00  | 146  | Mm.29094  | 0.06 | 3.16   | 269   |
| Serine (or cysteine) peptidase inhibitor, clade A, member 1a                                       | SERPINA1A | Hs.525557 | 11.01 | 2056.00 | 2056 | Mm.312593 | 1.02 | 26.47  | 11751 |
| Serine (or cysteine) peptidase inhibitor, clade A, member 6                                        | SERPINA6  | Hs.532635 | 1.86  | 5.90    | 496  | Mm.290079 | 9.53 | 736.00 | 736   |
| Serine (or cysteine) peptidase inhibitor, clade C (antithrombin), member 1                         | SERPINC1  | Hs.75599  | 7.81  | 223.00  | 223  | Mm.260770 | 7.68 | 247.63 | 4705  |
| Serine (or cysteine) peptidase inhibitor, clade D, member 1                                        | SERPIND1  | Hs.474270 | 10.90 | 1911.00 | 1911 | Mm.6609   | 2.13 | 9.00   | 648   |
| Serine (or cysteine) peptidase inhibitor, clade F, member 2                                        | SERPINF2  | Hs.159509 | 4.70  | 25.00   | 25   | Mm.279733 | 5.98 | 62.00  | 62    |
| Serine (or cysteine) peptidase inhibitor, clade G, member 1                                        | SERPING1  | Hs.384598 | 1.39  | 11.35   | 4382 | Mm.38888  | 1.46 | 5.38   | 43    |
| Solute carrier family 22 (organic cation transporter), member 1                                    | SLC22A1   | Hs.117367 | 7.56  | 269.57  | 1887 | Mm.594    | 0.05 | 1.11   | 340   |
| Solute carrier family 25 (mitochondrial carrier ornithine transporter), member 15                  | SLC25A15  | Hs.442781 | 6.00  | 63.00   | 63   | Mm.200907 | 4.70 | 25.00  | 25    |
| Solute carrier family 27 (fatty acid transporter), member 5                                        | SLC27A5   | Hs.309583 | 2.09  | 28.56   | 1571 | Mm.10984  | 8.09 | 545.00 | 545   |
| Solute carrier family 2 (facilitated glucose transporter), member 2                                | SLC2A2    | Hs.167584 | 9.43  | 689.00  | 689  | Mm.18443  | 2.42 | 5.69   | 74    |
| Solute carrier family 38, member 3                                                                 | SLC38A3   | Hs.76460  | 9.62  | 785.00  | 785  | Mm.296560 | 1.12 | 3.02   | 136   |
| Solute carrier organic anion transporter family, member 2b1                                        | SLCO2B1   | Hs.7884   | 2.44  | 9.38    | 75   | Mm.11249  | 5.49 | 44.00  | 44    |
| Spermatogenesis associated 13                                                                      | SPATA13   | Hs.131017 | 3.51  | 18.83   | 113  | Mm.149776 | 3.12 | 12.50  | 25    |
| Tryptophan 2,3-dioxygenase                                                                         | TDO2      | Hs.183671 | 3.58  | 11.00   | 11   | Mm.258622 | 5.49 | 67.00  | 134   |
| Transferrin receptor 2                                                                             | TFR2      | Hs.544932 | 6.13  | 69.00   | 69   | Mm.21757  | 4.70 | 25.00  | 25    |
| Transmembrane 4 superfamily member 4                                                               | TM4SF4    | Hs.133527 | 6.38  | 82.00   | 82   | Mm.26618  | 2.90 | 7.82   | 133   |

|                                                       |         |           |       |         |      |           |       |        |     |
|-------------------------------------------------------|---------|-----------|-------|---------|------|-----------|-------|--------|-----|
| Transmembrane serine protease 6                       | TMPRSS6 | Hs.370885 | 6.41  | 84.00   | 84   | Mm.34056  | 4.91  | 29.00  | 29  |
| Transferrin                                           | TF      | Hs.518267 | 2.72  | 7.22    | 65   | Mm.37214  | 4.86  | 28.00  | 28  |
| Thioredoxin domain containing 11                      | TXNDC11 | Hs.313847 | 1.58  | 3.50    | 14   | Mm.291015 | -1.62 | 0.24   | 16  |
| UDP glucuronosyltransferase 2 family, polypeptide B1  | UGT2B1  | Hs.285887 | 8.03  | 260.00  | 260  | Mm.26741  | 4.09  | 16.00  | 16  |
| UDP glucuronosyltransferase 2 family, polypeptide B36 | UGT2B36 | Hs.150207 | 3.94  | 16.89   | 152  | Mm.291575 | 2.58  | 381.00 | 381 |
| Ureidopropionase, beta                                | UPB1    | Hs.474388 | 6.12  | 103.50  | 207  | Mm.441195 | .     | .      | .   |
| Zinc finger, A20 domain containing 2                  | ZA20D2  | Hs.406096 | 1.86  | 17.12   | 137  | Mm.292405 | 1.44  | 4.50   | 18  |
| Zinc finger, CCCH-type with G patch domain            | ZGPAT   | Hs.11900  | 10.06 | 1070.00 | 1070 | Mm.272712 | 0.43  | 4.67   | 56  |

**Table S2B. Liver-specific targets were categorized by into two highly-valued groups: intracellular/membrane and secreted.** Antibodies advertised as validated for western blotting were purchased from the listed vendors.

| Gene symbol | UniGene   | Category                  | Antibody source                | Cat. No.                       |
|-------------|-----------|---------------------------|--------------------------------|--------------------------------|
| ADH4        | Mm.158750 | intracellular or membrane | Aviva Systems Biology          | ARP43573_T100                  |
| AFM         | Mm.348786 | intracellular or membrane | Aviva Systems Biology          | ARP33804_P50                   |
| AGXT        | Mm.7457   | intracellular or membrane | Abcam                          | ab91074                        |
| AHCY        | Mm.330692 | intracellular or membrane | Abcam                          | ab56146                        |
| AHSG        | Mm.197554 | secreted                  | Aviva Systems Biology          | ARP33815_P50                   |
| ALDH1L1     | Mm.30035  | intracellular or membrane | abcam                          | ab56777                        |
| ALDOB       | Mm.218862 | intracellular or membrane | Abnova                         | H00000229-A01                  |
| AMBP        | Mm.2197   | secreted                  | Novus                          | H00000259-M01                  |
| AQP9        | Mm.335570 | intracellular or membrane | ADI                            | AQP91-A                        |
| ARG1        | Mm.154144 | intracellular or membrane | Aviva Systems Biology          | ARP45673_T100/ARP45672_T100    |
| ASGR1       | Mm.6559   | intracellular or membrane | Santa Cruz Biotechnology, Inc. | sc-13467                       |
| ASGR2       | Mm.1357   | intracellular or membrane | Santa Cruz Biotechnology, Inc. | sc-13471                       |
| ASL         | Mm.23869  | intracellular or membrane | Aviva Systems Biology          | ARP41667_T100                  |
| ASS1        | Mm.3217   | intracellular or membrane | Aviva Systems Biology          | ARP41367_T100                  |
| BAAT        | Mm.2859   | intracellular or membrane | Novus                          | H00000570-M02                  |
| BHMT        | Mm.329582 | intracellular or membrane | Aviva Systems Biology          | ARP41474_T100                  |
| COMT        | Mm.100940 | intracellular or membrane | Santa Cruz Biotechnology, Inc. | sc-28116                       |
| CP          | Mm.13787  | secreted                  | abcam                          | ab8813                         |
| CPS1        | Mm.343942 | intracellular or membrane | Abnova                         | H00001373-M01                  |
| DPYS        | Mm.275974 | intracellular or membrane | ISB                            | ISB005-2                       |
| ECH1        | Mm.291776 | intracellular or membrane | Abnova                         | H00001892-M01                  |
| FAH         | Mm.3798   | intracellular or membrane | Aviva Systems Biology          | ARP_41681_T100                 |
| FBP1        | Mm.423078 | intracellular or membrane | Aviva Systems Biology          | H00002203-A01/ARP41406_T100    |
| FGA         | Mm.88793  | secreted                  | Genway                         | 15-288-22856                   |
| FGL1        | Mm.277955 | intracellular or membrane | Novus                          | H00002267-M01                  |
| FTCD        | Mm.36278  | intracellular or membrane | abcam                          | ab5820                         |
| GCDH        | Mm.2475   | intracellular or membrane | Aviva Systems Biology          | ARP_43559_T100                 |
| GJB1        | Mm.21198  | intracellular or membrane | Aviva Systems Biology          | ARP36600_T200                  |
| GLS2        | Mm.30102  | intracellular or membrane | Aviva Systems Biology          | ARP_43562_T100                 |
| GNMT        | Mm.29395  | intracellular or membrane | ISB                            | ISB011-1                       |
| HAAO        | Mm.30100  | intracellular or membrane | Abcam                          | ab77220                        |
| HAL         | Mm.13000  | intracellular or membrane | Aviva Systems Biology          | ARP45694_T100                  |
| HMGCS2      | Mm.289131 | intracellular or membrane | ISB                            | ISB003 2E11, 3A4, 5D9,6B4,7C12 |
| HP          | Mm.26730  | secreted                  | Genway                         | 15-288-20080F                  |
| HPD         | Mm.6584   | intracellular or membrane | ISB                            | ISB021-2                       |
| HPX         | Mm.3485   | secreted                  | Novus                          | H00003263-A01                  |
| KHK         | Mm.22451  | intracellular or membrane | Novus                          | H00003795-M01                  |
| KNG1        | Mm.2160   | intracellular or membrane | Aviva Systems Biology          | ARP45680_P050                  |

|       |           |                           |                       |                                |
|-------|-----------|---------------------------|-----------------------|--------------------------------|
| MAT1A | Mm.14064  | intracellular or membrane | Aviva Systems Biology | ARP41399_T100/ISB029-1         |
| MST1  | Mm.8369   | intracellular or membrane | Novus                 | H00004485-M01                  |
| PLG   | Mm.971    | secreted                  | innovative research   | IASMPLG-GF-1.0mg               |
| PON1  | Mm.389078 | secreted                  | Novus                 | H00005444-A01                  |
| RBP4  | Mm.2605   | secreted                  | Novus/Axxora          | H00005950-M01/ALX-210/437-C100 |
| TDO2  | Mm.258622 | intracellular or membrane | Novus                 | H00006999-A01                  |
| TF    | Mm.37214  | secreted                  | Genway                | 15-288-2009F                   |
| TFR2  | Mm.21757  | intracellular or membrane | HyCult                | HM2135                         |
| UPB1  | Mm.441195 | intracellular or membrane | Aviva Systems Biology | ARP_42467_T100                 |

### Table S3. SPRI of antibody arrays

Table S3A. Map of SPRI microarray Set A containing 792 printed features.

The position of each feature on the microarray is given as a row number and column number. A value of one in the "Sec." column indicates a secreted, liver-specific protein. A value of one in the "Intra." column indicates an intracellular, liver-specific protein.

| No. | Antibody target       | Source plate | Column | Row | Sec. | Intra. |
|-----|-----------------------|--------------|--------|-----|------|--------|
| 1   | Apln                  | A22          | 1      | 1   | 0    | 0      |
| 2   | Nef3                  | B20          | 2      | 1   | 0    | 0      |
| 3   | GCDFP 15              | C18          | 3      | 1   | 0    | 0      |
| 4   | v-Snare vit 1p (D-19) | D16          | 4      | 1   | 0    | 0      |
| 5   | YWHA F                | E14          | 5      | 1   | 0    | 0      |
| 6   | HAGH                  | F12          | 6      | 1   | 0    | 0      |
| 7   | GPC6                  | G10          | 7      | 1   | 0    | 0      |
| 8   | PN18                  | H8           | 8      | 1   | 0    | 0      |
| 9   | CD4                   | I6           | 9      | 1   | 0    | 0      |
| 10  | TCR2                  | J4           | 10     | 1   | 0    | 0      |
| 11  | IkB alpha             | K2           | 11     | 1   | 0    | 0      |
| 12  | IL1 alpha capture     | K24          | 12     | 1   | 0    | 0      |
| 13  | TNF alpha detection   | L22          | 13     | 1   | 0    | 0      |
| 14  | ALDOB                 | M20          | 14     | 1   | 0    | 1      |
| 15  | haptoglobin           | N18          | 15     | 1   | 1    | 0      |
| 16  | RBP4                  | O16          | 16     | 1   | 1    | 0      |
| 17  | ASGRP1/2(FL)          | P14          | 17     | 1   | 0    | 1      |
| 18  | Empty                 | Empty        | 18     | 1   | 0    | 0      |
| 19  | Apln                  | A22          | 19     | 1   | 0    | 0      |
| 20  | Nef3                  | B20          | 20     | 1   | 0    | 0      |
| 21  | GCDFP 15              | C18          | 21     | 1   | 0    | 0      |
| 22  | v-Snare vit 1p (D-19) | D16          | 22     | 1   | 0    | 0      |
| 23  | YWHA F                | E14          | 23     | 1   | 0    | 0      |
| 24  | HAGH                  | F12          | 24     | 1   | 0    | 0      |
| 25  | GPC6                  | G10          | 25     | 1   | 0    | 0      |
| 26  | PN18                  | H8           | 26     | 1   | 0    | 0      |
| 27  | CD4                   | I6           | 27     | 1   | 0    | 0      |
| 28  | TCR2                  | J4           | 28     | 1   | 0    | 0      |
| 29  | IkB alpha             | K2           | 29     | 1   | 0    | 0      |
| 30  | IL1 alpha capture     | K24          | 30     | 1   | 0    | 0      |
| 31  | TNF alpha detection   | L22          | 31     | 1   | 0    | 0      |
| 32  | ALDOB                 | M20          | 32     | 1   | 0    | 1      |
| 33  | haptoglobin           | N18          | 33     | 1   | 1    | 0      |
| 34  | RBP4                  | O16          | 34     | 1   | 1    | 0      |



|    |                   |       |    |   |   |   |
|----|-------------------|-------|----|---|---|---|
| 35 | ASGRP1/2(FL)      | P14   | 35 | 1 | 0 | 1 |
| 36 | Empty             | Empty | 36 | 1 | 0 | 0 |
| 37 | Rgs4              | A20   | 1  | 2 | 0 | 0 |
| 38 | Plat              | B18   | 2  | 2 | 0 | 0 |
| 39 | Eolase            | C16   | 3  | 2 | 0 | 0 |
| 40 | PSA (A67-B/E3)    | D14   | 4  | 2 | 0 | 0 |
| 41 | MRE11A            | E12   | 5  | 2 | 0 | 0 |
| 42 | cyclophilin       | F10   | 6  | 2 | 0 | 0 |
| 43 | E2A               | G8    | 7  | 2 | 0 | 0 |
| 44 | PN16              | H6    | 8  | 2 | 0 | 0 |
| 45 | CD11c             | I4    | 9  | 2 | 0 | 0 |
| 46 | Dendritic         | J2    | 10 | 2 | 0 | 0 |
| 47 | TCR (GL3)         | J24   | 11 | 2 | 0 | 0 |
| 48 | IL1B capture      | K22   | 12 | 2 | 0 | 0 |
| 49 | TNF capture       | L20   | 13 | 2 | 0 | 0 |
| 50 | catalase          | M18   | 14 | 2 | 0 | 1 |
| 51 | ASGPR             | N16   | 15 | 2 | 0 | 1 |
| 52 | ASGPR2            | O14   | 16 | 2 | 0 | 1 |
| 53 | AG                | P12   | 17 | 2 | 0 | 1 |
| 54 | Empty             | Empty | 18 | 2 | 0 | 0 |
| 55 | Rgs4              | A20   | 19 | 2 | 0 | 0 |
| 56 | Plat              | B18   | 20 | 2 | 0 | 0 |
| 57 | Eolase            | C16   | 21 | 2 | 0 | 0 |
| 58 | PSA (A67-B/E3)    | D14   | 22 | 2 | 0 | 0 |
| 59 | MRE11A            | E12   | 23 | 2 | 0 | 0 |
| 60 | cyclophilin       | F10   | 24 | 2 | 0 | 0 |
| 61 | E2A               | G8    | 25 | 2 | 0 | 0 |
| 62 | PN16              | H6    | 26 | 2 | 0 | 0 |
| 63 | CD11c             | I4    | 27 | 2 | 0 | 0 |
| 64 | Dendritic         | J2    | 28 | 2 | 0 | 0 |
| 65 | TCR (GL3)         | J24   | 29 | 2 | 0 | 0 |
| 66 | IL1B capture      | K22   | 30 | 2 | 0 | 0 |
| 67 | TNF capture       | L20   | 31 | 2 | 0 | 0 |
| 68 | catalase          | M18   | 32 | 2 | 0 | 1 |
| 69 | ASGPR             | N16   | 33 | 2 | 0 | 1 |
| 70 | ASGPR2            | O14   | 34 | 2 | 0 | 1 |
| 71 | AG                | P12   | 35 | 2 | 0 | 1 |
| 72 | Empty             | Empty | 36 | 2 | 0 | 0 |
| 73 | Msr2              | A18   | 1  | 3 | 0 | 0 |
| 74 | Isgf3g            | B16   | 2  | 3 | 0 | 0 |
| 75 | PSA               | C14   | 3  | 3 | 0 | 0 |
| 76 | Plasma Kallikrein | D12   | 4  | 3 | 0 | 0 |
| 77 | PTPRK             | E10   | 5  | 3 | 0 | 0 |

|     |                   |       |    |   |   |   |
|-----|-------------------|-------|----|---|---|---|
| 78  | NORG1             | F8    | 6  | 3 | 0 | 0 |
| 79  | C/EBP?            | G6    | 7  | 3 | 0 | 0 |
| 80  | PN14              | H4    | 8  | 3 | 0 | 0 |
| 81  | CD11b             | I2    | 9  | 3 | 0 | 0 |
| 82  | IL8               | I24   | 10 | 3 | 0 | 0 |
| 83  | CD16/CD32         | J22   | 11 | 3 | 0 | 0 |
| 84  | IL6 detection     | K20   | 12 | 3 | 0 | 0 |
| 85  | KC capture        | L18   | 13 | 3 | 0 | 0 |
| 86  | ASGPR2            | M16   | 14 | 3 | 0 | 1 |
| 87  | LCAT              | N14   | 15 | 3 | 1 | 0 |
| 88  | ASGPR1            | O12   | 16 | 3 | 0 | 1 |
| 89  | AG                | P10   | 17 | 3 | 0 | 1 |
| 90  | Empty             | Empty | 18 | 3 | 0 | 0 |
| 91  | Msr2              | A18   | 19 | 3 | 0 | 0 |
| 92  | Isgf3g            | B16   | 20 | 3 | 0 | 0 |
| 93  | PSA               | C14   | 21 | 3 | 0 | 0 |
| 94  | Plasma Kallikrein | D12   | 22 | 3 | 0 | 0 |
| 95  | PTPRK             | E10   | 23 | 3 | 0 | 0 |
| 96  | NORG1             | F8    | 24 | 3 | 0 | 0 |
| 97  | C/EBP?            | G6    | 25 | 3 | 0 | 0 |
| 98  | PN14              | H4    | 26 | 3 | 0 | 0 |
| 99  | CD11b             | I2    | 27 | 3 | 0 | 0 |
| 100 | IL8               | I24   | 28 | 3 | 0 | 0 |
| 101 | CD16/CD32         | J22   | 29 | 3 | 0 | 0 |
| 102 | IL6 detection     | K20   | 30 | 3 | 0 | 0 |
| 103 | KC capture        | L18   | 31 | 3 | 0 | 0 |
| 104 | ASGPR2            | M16   | 32 | 3 | 0 | 1 |
| 105 | LCAT              | N14   | 33 | 3 | 1 | 0 |
| 106 | ASGPR1            | O12   | 34 | 3 | 0 | 1 |
| 107 | AG                | P10   | 35 | 3 | 0 | 1 |
| 108 | Empty             | Empty | 36 | 3 | 0 | 0 |
| 109 | Gc                | A16   | 1  | 4 | 1 | 0 |
| 110 | Rgs4              | B14   | 2  | 4 | 0 | 0 |
| 111 | ATP 6E            | C12   | 3  | 4 | 0 | 0 |
| 112 | Asb-3             | D10   | 4  | 4 | 0 | 0 |
| 113 | Lamin A/C         | E8    | 5  | 4 | 0 | 0 |
| 114 | NERPVR            | F6    | 6  | 4 | 0 | 0 |
| 115 | blm               | G4    | 7  | 4 | 0 | 0 |
| 116 | PN12              | H2    | 8  | 4 | 0 | 0 |
| 117 | Ly-6G             | H24   | 9  | 4 | 0 | 0 |
| 118 | G1                | I22   | 10 | 4 | 0 | 0 |
| 119 | CD3 (T cells)     | J20   | 11 | 4 | 0 | 0 |
| 120 | Isc 15            | K18   | 12 | 4 | 0 | 0 |

|     |                         |       |    |   |   |   |
|-----|-------------------------|-------|----|---|---|---|
| 121 | I-TAC capture           | L16   | 13 | 4 | 0 | 0 |
| 122 | AQP9                    | M14   | 14 | 4 | 0 | 1 |
| 123 | properdin, B factor     | N12   | 15 | 4 | 1 | 0 |
| 124 | plasminogen             | O10   | 16 | 4 | 1 | 0 |
| 125 | Transferrin             | P8    | 17 | 4 | 1 | 0 |
| 126 | Empty                   | Empty | 18 | 4 | 0 | 0 |
| 127 | Gc                      | A16   | 19 | 4 | 1 | 0 |
| 128 | Rgs4                    | B14   | 20 | 4 | 0 | 0 |
| 129 | ATP 6E                  | C12   | 21 | 4 | 0 | 0 |
| 130 | Asb-3                   | D10   | 22 | 4 | 0 | 0 |
| 131 | Lamin A/C               | E8    | 23 | 4 | 0 | 0 |
| 132 | NERPVR                  | F6    | 24 | 4 | 0 | 0 |
| 133 | blm                     | G4    | 25 | 4 | 0 | 0 |
| 134 | PN12                    | H2    | 26 | 4 | 0 | 0 |
| 135 | Ly-6G                   | H24   | 27 | 4 | 0 | 0 |
| 136 | G1                      | I22   | 28 | 4 | 0 | 0 |
| 137 | CD3 (T cells)           | J20   | 29 | 4 | 0 | 0 |
| 138 | Isc 15                  | K18   | 30 | 4 | 0 | 0 |
| 139 | I-TAC capture           | L16   | 31 | 4 | 0 | 0 |
| 140 | AQP9                    | M14   | 32 | 4 | 0 | 1 |
| 141 | properdin, B factor     | N12   | 33 | 4 | 1 | 0 |
| 142 | plasminogen             | O10   | 34 | 4 | 1 | 0 |
| 143 | Transferrin             | P8    | 35 | 4 | 1 | 0 |
| 144 | Empty                   | Empty | 36 | 4 | 0 | 0 |
| 145 | Tln1                    | A14   | 1  | 5 | 0 | 0 |
| 146 | B2m                     | B12   | 2  | 5 | 0 | 0 |
| 147 | Neuron Specific Enolase | C10   | 3  | 5 | 0 | 0 |
| 148 | Odf 2                   | D8    | 4  | 5 | 0 | 0 |
| 149 | JAK 3 (C-21)            | E6    | 5  | 5 | 0 | 0 |
| 150 | TKTL                    | F4    | 6  | 5 | 0 | 0 |
| 151 | APC                     | G2    | 7  | 5 | 0 | 0 |
| 152 | ?-catenin               | G24   | 8  | 5 | 0 | 0 |
| 153 | CD14                    | H22   | 9  | 5 | 0 | 0 |
| 154 | LAMP1                   | I20   | 10 | 5 | 0 | 0 |
| 155 | CD45R/B cell            | J18   | 11 | 5 | 0 | 0 |
| 156 | human lactoferrin       | K16   | 12 | 5 | 0 | 0 |
| 157 | IFN-r detection         | L14   | 13 | 5 | 0 | 0 |
| 158 | C3                      | M12   | 14 | 5 | 1 | 0 |
| 159 | CPS1                    | N10   | 15 | 5 | 0 | 1 |
| 160 | ANGPTL3                 | O8    | 16 | 5 | 0 | 1 |
| 161 | A1BG                    | P6    | 17 | 5 | 1 | 0 |
| 162 | Empty                   | Empty | 18 | 5 | 0 | 0 |
| 163 | Tln1                    | A14   | 19 | 5 | 0 | 0 |

|     |                         |       |    |   |   |   |
|-----|-------------------------|-------|----|---|---|---|
| 164 | B2m                     | B12   | 20 | 5 | 0 | 0 |
| 165 | Neuron Specific Enolase | C10   | 21 | 5 | 0 | 0 |
| 166 | Odf 2                   | D8    | 22 | 5 | 0 | 0 |
| 167 | JAK 3 (C-21)            | E6    | 23 | 5 | 0 | 0 |
| 168 | TKTL                    | F4    | 24 | 5 | 0 | 0 |
| 169 | APC                     | G2    | 25 | 5 | 0 | 0 |
| 170 | ?-catenin               | G24   | 26 | 5 | 0 | 0 |
| 171 | CD14                    | H22   | 27 | 5 | 0 | 0 |
| 172 | LAMP1                   | I20   | 28 | 5 | 0 | 0 |
| 173 | CD45R/B cell            | J18   | 29 | 5 | 0 | 0 |
| 174 | human lactoferrin       | K16   | 30 | 5 | 0 | 0 |
| 175 | IFN-r detection         | L14   | 31 | 5 | 0 | 0 |
| 176 | C3                      | M12   | 32 | 5 | 1 | 0 |
| 177 | CPS1                    | N10   | 33 | 5 | 0 | 1 |
| 178 | ANGPTL3                 | O8    | 34 | 5 | 0 | 1 |
| 179 | A1BG                    | P6    | 35 | 5 | 1 | 0 |
| 180 | Empty                   | Empty | 36 | 5 | 0 | 0 |
| 181 | Apod                    | A12   | 1  | 6 | 0 | 0 |
| 182 | Ncoa2                   | B10   | 2  | 6 | 0 | 0 |
| 183 | Syntenin                | C8    | 3  | 6 | 0 | 0 |
| 184 | TSG 101                 | D6    | 4  | 6 | 0 | 0 |
| 185 | Tenascin-R              | E4    | 5  | 6 | 0 | 0 |
| 186 | NGEPS                   | F2    | 6  | 6 | 0 | 0 |
| 187 | PN10                    | F24   | 7  | 6 | 0 | 0 |
| 188 | PTEN(26H9)              | G22   | 8  | 6 | 0 | 0 |
| 189 | CD4                     | H20   | 9  | 6 | 0 | 0 |
| 190 | CD8a                    | I18   | 10 | 6 | 0 | 0 |
| 191 | CD45-2                  | J16   | 11 | 6 | 0 | 0 |
| 192 | PKB                     | K14   | 12 | 6 | 0 | 0 |
| 193 | mJE detection           | L12   | 13 | 6 | 0 | 0 |
| 194 | MIP-2 capture           | M10   | 14 | 6 | 0 | 0 |
| 195 | ALDH4A1                 | N8    | 15 | 6 | 0 | 1 |
| 196 | albumin                 | O6    | 16 | 6 | 1 | 0 |
| 197 | GJB1                    | P4    | 17 | 6 | 0 | 1 |
| 198 | Empty                   | Empty | 18 | 6 | 0 | 0 |
| 199 | Apod                    | A12   | 19 | 6 | 0 | 0 |
| 200 | Ncoa2                   | B10   | 20 | 6 | 0 | 0 |
| 201 | Syntenin                | C8    | 21 | 6 | 0 | 0 |
| 202 | TSG 101                 | D6    | 22 | 6 | 0 | 0 |
| 203 | Tenascin-R              | E4    | 23 | 6 | 0 | 0 |
| 204 | NGEPS                   | F2    | 24 | 6 | 0 | 0 |
| 205 | PN10                    | F24   | 25 | 6 | 0 | 0 |
| 206 | PTEN(26H9)              | G22   | 26 | 6 | 0 | 0 |

|     |                   |       |    |   |   |   |
|-----|-------------------|-------|----|---|---|---|
| 207 | CD4               | H20   | 27 | 6 | 0 | 0 |
| 208 | CD8a              | I18   | 28 | 6 | 0 | 0 |
| 209 | CD45-2            | J16   | 29 | 6 | 0 | 0 |
| 210 | PKB               | K14   | 30 | 6 | 0 | 0 |
| 211 | mJE detection     | L12   | 31 | 6 | 0 | 0 |
| 212 | MIP-2 capture     | M10   | 32 | 6 | 0 | 0 |
| 213 | ALDH4A1           | N8    | 33 | 6 | 0 | 1 |
| 214 | albumin           | O6    | 34 | 6 | 1 | 0 |
| 215 | GJB1              | P4    | 35 | 6 | 0 | 1 |
| 216 | Empty             | Empty | 36 | 6 | 0 | 0 |
| 217 | Apob              | A10   | 1  | 7 | 1 | 0 |
| 218 | Apob alt          | B8    | 2  | 7 | 1 | 0 |
| 219 | Ubiquitin         | C6    | 3  | 7 | 0 | 0 |
| 220 | Sortilin          | D4    | 4  | 7 | 0 | 0 |
| 221 | a-VASP            | E2    | 5  | 7 | 0 | 0 |
| 222 | STPAP2            | E24   | 6  | 7 | 0 | 0 |
| 223 | PN8               | F22   | 7  | 7 | 0 | 0 |
| 224 | Oct3/4            | G20   | 8  | 7 | 0 | 0 |
| 225 | CD117 (c-kit)     | H18   | 9  | 7 | 0 | 0 |
| 226 | IL6               | I16   | 10 | 7 | 0 | 0 |
| 227 | CD49e             | J14   | 11 | 7 | 0 | 0 |
| 228 | Dyn2              | K12   | 12 | 7 | 0 | 0 |
| 229 | IFN-r capture     | L10   | 13 | 7 | 0 | 0 |
| 230 | MCP-5 captrue     | M8    | 14 | 7 | 0 | 0 |
| 231 | TDO2              | N6    | 15 | 7 | 0 | 1 |
| 232 | TfR2              | O4    | 16 | 7 | 0 | 1 |
| 233 | NF1C              | P2    | 17 | 7 | 0 | 0 |
| 234 | C3 (from chicken) | P24   | 18 | 7 | 1 | 0 |
| 235 | Apob              | A10   | 19 | 7 | 1 | 0 |
| 236 | Apob alt          | B8    | 20 | 7 | 1 | 0 |
| 237 | Ubiquitin         | C6    | 21 | 7 | 0 | 0 |
| 238 | Sortilin          | D4    | 22 | 7 | 0 | 0 |
| 239 | a-VASP            | E2    | 23 | 7 | 0 | 0 |
| 240 | STPAP2            | E24   | 24 | 7 | 0 | 0 |
| 241 | PN8               | F22   | 25 | 7 | 0 | 0 |
| 242 | Oct3/4            | G20   | 26 | 7 | 0 | 0 |
| 243 | CD117 (c-kit)     | H18   | 27 | 7 | 0 | 0 |
| 244 | IL6               | I16   | 28 | 7 | 0 | 0 |
| 245 | CD49e             | J14   | 29 | 7 | 0 | 0 |
| 246 | Dyn2              | K12   | 30 | 7 | 0 | 0 |
| 247 | IFN-r capture     | L10   | 31 | 7 | 0 | 0 |
| 248 | MCP-5 captrue     | M8    | 32 | 7 | 0 | 0 |
| 249 | TDO2              | N6    | 33 | 7 | 0 | 1 |

|     |                   |     |    |   |   |   |
|-----|-------------------|-----|----|---|---|---|
| 250 | TfR2              | O4  | 34 | 7 | 0 | 1 |
| 251 | NF1C              | P2  | 35 | 7 | 0 | 0 |
| 252 | C3 (from chicken) | P24 | 36 | 7 | 1 | 0 |
| 253 | B2m               | A8  | 1  | 8 | 0 | 0 |
| 254 | Nek6              | B6  | 2  | 8 | 0 | 0 |
| 255 | ARGBP2 (NT)       | C4  | 3  | 8 | 0 | 0 |
| 256 | URP1              | D2  | 4  | 8 | 0 | 0 |
| 257 | ZAG (H-21)        | D24 | 5  | 8 | 0 | 0 |
| 258 | IGFBP6            | E22 | 6  | 8 | 0 | 0 |
| 259 | PN6               | F20 | 7  | 8 | 0 | 0 |
| 260 | Nanog             | G18 | 8  | 8 | 0 | 0 |
| 261 | CD152 (CTLA-4)    | H16 | 9  | 8 | 0 | 0 |
| 262 | B7-1              | I14 | 10 | 8 | 0 | 0 |
| 263 | CD32              | J12 | 11 | 8 | 0 | 0 |
| 264 | TCR9              | K10 | 12 | 8 | 0 | 0 |
| 265 | IL10 detection    | L8  | 13 | 8 | 0 | 0 |
| 266 | GM-CSF detection  | M6  | 14 | 8 | 0 | 0 |
| 267 | PON1              | N4  | 15 | 8 | 1 | 0 |
| 268 | GST               | O2  | 16 | 8 | 0 | 0 |
| 269 | ASGR2             | O24 | 17 | 8 | 0 | 1 |
| 270 | C3 (from chicken) | P22 | 18 | 8 | 1 | 0 |
| 271 | B2m               | A8  | 19 | 8 | 0 | 0 |
| 272 | Nek6              | B6  | 20 | 8 | 0 | 0 |
| 273 | ARGBP2 (NT)       | C4  | 21 | 8 | 0 | 0 |
| 274 | URP1              | D2  | 22 | 8 | 0 | 0 |
| 275 | ZAG (H-21)        | D24 | 23 | 8 | 0 | 0 |
| 276 | IGFBP6            | E22 | 24 | 8 | 0 | 0 |
| 277 | PN6               | F20 | 25 | 8 | 0 | 0 |
| 278 | Nanog             | G18 | 26 | 8 | 0 | 0 |
| 279 | CD152 (CTLA-4)    | H16 | 27 | 8 | 0 | 0 |
| 280 | B7-1              | I14 | 28 | 8 | 0 | 0 |
| 281 | CD32              | J12 | 29 | 8 | 0 | 0 |
| 282 | TCR9              | K10 | 30 | 8 | 0 | 0 |
| 283 | IL10 detection    | L8  | 31 | 8 | 0 | 0 |
| 284 | GM-CSF detection  | M6  | 32 | 8 | 0 | 0 |
| 285 | PON1              | N4  | 33 | 8 | 1 | 0 |
| 286 | GST               | O2  | 34 | 8 | 0 | 0 |
| 287 | ASGR2             | O24 | 35 | 8 | 0 | 1 |
| 288 | C3 (from chicken) | P22 | 36 | 8 | 1 | 0 |
| 289 | Gusb              | A6  | 1  | 9 | 0 | 0 |
| 290 | Cldn11            | B4  | 2  | 9 | 0 | 0 |
| 291 | Hist 3H2A         | C2  | 3  | 9 | 0 | 0 |
| 292 | Zip               | C24 | 4  | 9 | 0 | 0 |

|     |                        |     |    |    |   |   |
|-----|------------------------|-----|----|----|---|---|
| 293 | Glial Filament Protein | D22 | 5  | 9  | 0 | 0 |
| 294 | WNK4                   | E20 | 6  | 9  | 0 | 0 |
| 295 | PN4                    | F18 | 7  | 9  | 0 | 0 |
| 296 | LRP-5/6                | G16 | 8  | 9  | 0 | 0 |
| 297 | CD45R/B220             | H14 | 9  | 9  | 0 | 0 |
| 298 | Ly-6G                  | I12 | 10 | 9  | 0 | 0 |
| 299 | Cd49b                  | J10 | 11 | 9  | 0 | 0 |
| 300 | talin                  | K8  | 12 | 9  | 0 | 0 |
| 301 | IL15 detection         | L6  | 13 | 9  | 0 | 0 |
| 302 | TGF-beta1 detection    | M4  | 14 | 9  | 0 | 0 |
| 303 | HSD11B2                | N2  | 15 | 9  | 0 | 1 |
| 304 | ceruloplasmin          | N24 | 16 | 9  | 1 | 0 |
| 305 | AMBP                   | O22 | 17 | 9  | 1 | 0 |
| 306 | C3 (from chicken)      | P20 | 18 | 9  | 1 | 0 |
| 307 | Gusb                   | A6  | 19 | 9  | 0 | 0 |
| 308 | Cldn11                 | B4  | 20 | 9  | 0 | 0 |
| 309 | Hist 3H2A              | C2  | 21 | 9  | 0 | 0 |
| 310 | Zip                    | C24 | 22 | 9  | 0 | 0 |
| 311 | Glial Filament Protein | D22 | 23 | 9  | 0 | 0 |
| 312 | WNK4                   | E20 | 24 | 9  | 0 | 0 |
| 313 | PN4                    | F18 | 25 | 9  | 0 | 0 |
| 314 | LRP-5/6                | G16 | 26 | 9  | 0 | 0 |
| 315 | CD45R/B220             | H14 | 27 | 9  | 0 | 0 |
| 316 | Ly-6G                  | I12 | 28 | 9  | 0 | 0 |
| 317 | Cd49b                  | J10 | 29 | 9  | 0 | 0 |
| 318 | talin                  | K8  | 30 | 9  | 0 | 0 |
| 319 | IL15 detection         | L6  | 31 | 9  | 0 | 0 |
| 320 | TGF-beta1 detection    | M4  | 32 | 9  | 0 | 0 |
| 321 | HSD11B2                | N2  | 33 | 9  | 0 | 1 |
| 322 | ceruloplasmin          | N24 | 34 | 9  | 1 | 0 |
| 323 | AMBP                   | O22 | 35 | 9  | 1 | 0 |
| 324 | C3 (from chicken)      | P20 | 36 | 9  | 1 | 0 |
| 325 | Cd83                   | A4  | 1  | 10 | 0 | 0 |
| 326 | Ctsc                   | B2  | 2  | 10 | 0 | 0 |
| 327 | ubiquitin              | B24 | 3  | 10 | 0 | 0 |
| 328 | MTLR4                  | C22 | 4  | 10 | 0 | 0 |
| 329 | Integrin alpha 3       | D20 | 5  | 10 | 0 | 0 |
| 330 | ADRM1                  | E18 | 6  | 10 | 0 | 0 |
| 331 | PN2                    | F16 | 7  | 10 | 0 | 0 |
| 332 | Laminin Receptor       | G14 | 8  | 10 | 0 | 0 |
| 333 | IFN-r                  | H12 | 9  | 10 | 0 | 0 |
| 334 | F4/80                  | I10 | 10 | 10 | 0 | 0 |
| 335 | m-r                    | J8  | 11 | 10 | 0 | 0 |



|     |                                       |     |    |    |   |   |
|-----|---------------------------------------|-----|----|----|---|---|
| 336 | MyD 88                                | K6  | 12 | 10 | 0 | 0 |
| 337 | IL1 alpha detection                   | L4  | 13 | 10 | 0 | 0 |
| 338 | MIG detection                         | M2  | 14 | 10 | 0 | 0 |
| 339 | HPX                                   | M24 | 15 | 10 | 1 | 0 |
| 340 | fibrinogen                            | N22 | 16 | 10 | 1 | 0 |
| 341 | BAAT                                  | O20 | 17 | 10 | 0 | 1 |
| 342 | albumin detection Ab                  | P18 | 18 | 10 | 1 | 0 |
| 343 | Cd83                                  | A4  | 19 | 10 | 0 | 0 |
| 344 | Ctsc                                  | B2  | 20 | 10 | 0 | 0 |
| 345 | ubiquitin                             | B24 | 21 | 10 | 0 | 0 |
| 346 | MTLR4                                 | C22 | 22 | 10 | 0 | 0 |
| 347 | Integrin alpha 3                      | D20 | 23 | 10 | 0 | 0 |
| 348 | ADRM1                                 | E18 | 24 | 10 | 0 | 0 |
| 349 | PN2                                   | F16 | 25 | 10 | 0 | 0 |
| 350 | Laminin Receptor                      | G14 | 26 | 10 | 0 | 0 |
| 351 | IFN-r                                 | H12 | 27 | 10 | 0 | 0 |
| 352 | F4/80                                 | I10 | 28 | 10 | 0 | 0 |
| 353 | m-r                                   | J8  | 29 | 10 | 0 | 0 |
| 354 | MyD 88                                | K6  | 30 | 10 | 0 | 0 |
| 355 | IL1 alpha detection                   | L4  | 31 | 10 | 0 | 0 |
| 356 | MIG detection                         | M2  | 32 | 10 | 0 | 0 |
| 357 | HPX                                   | M24 | 33 | 10 | 1 | 0 |
| 358 | fibrinogen                            | N22 | 34 | 10 | 1 | 0 |
| 359 | BAAT                                  | O20 | 35 | 10 | 0 | 1 |
| 360 | albumin detection Ab                  | P18 | 36 | 10 | 1 | 0 |
| 361 | C1qc                                  | A2  | 1  | 11 | 0 | 0 |
| 362 | Gfap                                  | A24 | 2  | 11 | 0 | 0 |
| 363 | Atp1b2                                | B22 | 3  | 11 | 0 | 0 |
| 364 | Proteasome Inhibitor Subunit 1<br>P13 | C20 | 4  | 11 | 0 | 0 |
| 365 | AR (441)                              | D18 | 5  | 11 | 0 | 0 |
| 366 | AK2 (N-term)                          | E16 | 6  | 11 | 0 | 0 |
| 367 | HMGCS2                                | F14 | 7  | 11 | 0 | 1 |
| 368 | HDGF                                  | G12 | 8  | 11 | 0 | 0 |
| 369 | PN20                                  | H10 | 9  | 11 | 0 | 0 |
| 370 | CD86                                  | I8  | 10 | 11 | 0 | 0 |
| 371 | CD16/CD32                             | J6  | 11 | 11 | 0 | 0 |
| 372 | IRAK-1                                | K4  | 12 | 11 | 0 | 0 |
| 373 | IL-15 capture                         | L2  | 13 | 11 | 0 | 0 |
| 374 | TGF-beta1 capture                     | L24 | 14 | 11 | 0 | 0 |
| 375 | DPYS                                  | M22 | 15 | 11 | 0 | 1 |
| 376 | ferritin heavy chain                  | N20 | 16 | 11 | 1 | 0 |
| 377 | FGL1                                  | O18 | 17 | 11 | 0 | 1 |

|     |                                    |       |    |    |   |   |
|-----|------------------------------------|-------|----|----|---|---|
| 378 | ASGPR1 (8D7)                       | P16   | 18 | 11 | 0 | 1 |
| 379 | C1qc                               | A2    | 19 | 11 | 0 | 0 |
| 380 | Gfap                               | A24   | 20 | 11 | 0 | 0 |
| 381 | Atp1b2                             | B22   | 21 | 11 | 0 | 0 |
| 382 | Proteasome Inhibitor Subunit 1 P13 | C20   | 22 | 11 | 0 | 0 |
| 383 | AR (441)                           | D18   | 23 | 11 | 0 | 0 |
| 384 | AK2 (N-term)                       | E16   | 24 | 11 | 0 | 0 |
| 385 | HMGCS2                             | F14   | 25 | 11 | 0 | 1 |
| 386 | HDGF                               | G12   | 26 | 11 | 0 | 0 |
| 387 | PN20                               | H10   | 27 | 11 | 0 | 0 |
| 388 | CD86                               | I8    | 28 | 11 | 0 | 0 |
| 389 | CD16/CD32                          | J6    | 29 | 11 | 0 | 0 |
| 390 | IRAK-1                             | K4    | 30 | 11 | 0 | 0 |
| 391 | IL-15 capture                      | L2    | 31 | 11 | 0 | 0 |
| 392 | TGF-beta1 capture                  | L24   | 32 | 11 | 0 | 0 |
| 393 | DPYS                               | M22   | 33 | 11 | 0 | 1 |
| 394 | ferritin heavy chain               | N20   | 34 | 11 | 1 | 0 |
| 395 | FGL1                               | O18   | 35 | 11 | 0 | 1 |
| 396 | ASGPR1 (8D7)                       | P16   | 36 | 11 | 0 | 1 |
| 397 | Cfh                                | A21   | 1  | 12 | 1 | 0 |
| 398 | Lamp1                              | B19   | 2  | 12 | 0 | 0 |
| 399 | Rho D                              | C17   | 3  | 12 | 0 | 0 |
| 400 | Anti-GST                           | D15   | 4  | 12 | 0 | 0 |
| 401 | GADPH probe dye FAM-MGB            | E13   | 5  | 12 | 0 | 0 |
| 402 | PMCA                               | F11   | 6  | 12 | 0 | 0 |
| 403 | FGF4                               | G9    | 7  | 12 | 0 | 0 |
| 404 | PN17                               | H7    | 8  | 12 | 0 | 0 |
| 405 | CD3e                               | I5    | 9  | 12 | 0 | 0 |
| 406 | I-Ab                               | J3    | 10 | 12 | 0 | 0 |
| 407 | NF-kB                              | K1    | 11 | 12 | 0 | 0 |
| 408 | IL10 capture                       | K23   | 12 | 12 | 0 | 0 |
| 409 | MIP2 detection                     | L21   | 13 | 12 | 0 | 0 |
| 410 | catalase                           | M19   | 14 | 12 | 0 | 0 |
| 411 | transferrin                        | N17   | 15 | 12 | 1 | 0 |
| 412 | RBP4                               | O15   | 16 | 12 | 1 | 0 |
| 413 | ASGRP1                             | P13   | 17 | 12 | 0 | 1 |
| 414 | Empty                              | Empty | 18 | 12 | 0 | 0 |
| 415 | Cfh                                | A21   | 19 | 12 | 1 | 0 |
| 416 | Lamp1                              | B19   | 20 | 12 | 0 | 0 |
| 417 | Rho D                              | C17   | 21 | 12 | 0 | 0 |
| 418 | Anti-GST                           | D15   | 22 | 12 | 0 | 0 |
| 419 | GADPH probe dye FAM-MGB            | E13   | 23 | 12 | 0 | 0 |

|     |                  |       |    |    |   |   |
|-----|------------------|-------|----|----|---|---|
| 420 | PMCA             | F11   | 24 | 12 | 0 | 0 |
| 421 | FGF4             | G9    | 25 | 12 | 0 | 0 |
| 422 | PN17             | H7    | 26 | 12 | 0 | 0 |
| 423 | CD3e             | I5    | 27 | 12 | 0 | 0 |
| 424 | I-Ab             | J3    | 28 | 12 | 0 | 0 |
| 425 | NF-kB            | K1    | 29 | 12 | 0 | 0 |
| 426 | IL10 capture     | K23   | 30 | 12 | 0 | 0 |
| 427 | MIP2 detection   | L21   | 31 | 12 | 0 | 0 |
| 428 | catalase         | M19   | 32 | 12 | 0 | 0 |
| 429 | transferrin      | N17   | 33 | 12 | 1 | 0 |
| 430 | RBP4             | O15   | 34 | 12 | 1 | 0 |
| 431 | ASGRP1           | P13   | 35 | 12 | 0 | 1 |
| 432 | Empty            | Empty | 36 | 12 | 0 | 0 |
| 433 | Ptprz1           | A19   | 1  | 13 | 0 | 0 |
| 434 | Ramp3            | B17   | 2  | 13 | 0 | 0 |
| 435 | GDF15            | C15   | 3  | 13 | 0 | 0 |
| 436 | Trp-p8           | D13   | 4  | 13 | 0 | 0 |
| 437 | Kanadaplin       | E11   | 5  | 13 | 0 | 0 |
| 438 | PYPIV            | F9    | 6  | 13 | 0 | 0 |
| 439 | casein kinase 1? | G7    | 7  | 13 | 0 | 0 |
| 440 | PN15             | H5    | 8  | 13 | 0 | 0 |
| 441 | CD69             | I3    | 9  | 13 | 0 | 0 |
| 442 | M8D10.E10        | J1    | 10 | 13 | 0 | 0 |
| 443 | CD40             | J23   | 11 | 13 | 0 | 0 |
| 444 | IL4 detection    | K21   | 12 | 13 | 0 | 0 |
| 445 | KC detection     | L19   | 13 | 13 | 0 | 0 |
| 446 | HMGCS2           | M17   | 14 | 13 | 0 | 1 |
| 447 | ApoB             | N15   | 15 | 13 | 1 | 0 |
| 448 | ASL              | O13   | 16 | 13 | 0 | 1 |
| 449 | AG               | P11   | 17 | 13 | 0 | 1 |
| 450 | Empty            | Empty | 18 | 13 | 0 | 0 |
| 451 | Ptprz1           | A19   | 19 | 13 | 0 | 0 |
| 452 | Ramp3            | B17   | 20 | 13 | 0 | 0 |
| 453 | GDF15            | C15   | 21 | 13 | 0 | 0 |
| 454 | Trp-p8           | D13   | 22 | 13 | 0 | 0 |
| 455 | Kanadaplin       | E11   | 23 | 13 | 0 | 0 |
| 456 | PYPIV            | F9    | 24 | 13 | 0 | 0 |
| 457 | casein kinase 1? | G7    | 25 | 13 | 0 | 0 |
| 458 | PN15             | H5    | 26 | 13 | 0 | 0 |
| 459 | CD69             | I3    | 27 | 13 | 0 | 0 |
| 460 | M8D10.E10        | J1    | 28 | 13 | 0 | 0 |
| 461 | CD40             | J23   | 29 | 13 | 0 | 0 |
| 462 | IL4 detection    | K21   | 30 | 13 | 0 | 0 |

|     |                              |       |    |    |   |   |
|-----|------------------------------|-------|----|----|---|---|
| 463 | KC detection                 | L19   | 31 | 13 | 0 | 0 |
| 464 | HMGCS2                       | M17   | 32 | 13 | 0 | 1 |
| 465 | ApoB                         | N15   | 33 | 13 | 1 | 0 |
| 466 | ASL                          | O13   | 34 | 13 | 0 | 1 |
| 467 | AG                           | P11   | 35 | 13 | 0 | 1 |
| 468 | Empty                        | Empty | 36 | 13 | 0 | 0 |
| 469 | Ncoa2                        | A17   | 1  | 14 | 0 | 0 |
| 470 | Psap                         | B15   | 2  | 14 | 0 | 0 |
| 471 | PERK                         | C13   | 3  | 14 | 0 | 0 |
| 472 | Spectrin beta-1              | D11   | 4  | 14 | 0 | 0 |
| 473 | Sortilin                     | E9    | 5  | 14 | 0 | 0 |
| 474 | RFP2                         | F7    | 6  | 14 | 0 | 0 |
| 475 | C/EBP?                       | G5    | 7  | 14 | 0 | 0 |
| 476 | PN13                         | H3    | 8  | 14 | 0 | 0 |
| 477 | CD1.1, Ly-38                 | I1    | 9  | 14 | 0 | 0 |
| 478 | Cd33/OAV1D                   | I23   | 10 | 14 | 0 | 0 |
| 479 | 4-1 BB (TKS-1)               | J21   | 11 | 14 | 0 | 0 |
| 480 | IL12 detection               | K19   | 12 | 14 | 0 | 0 |
| 481 | IP10 capture                 | L17   | 13 | 14 | 0 | 0 |
| 482 | ASGPR1                       | M15   | 14 | 14 | 0 | 1 |
| 483 | C4                           | N13   | 15 | 14 | 1 | 0 |
| 484 | ferritin heavy chain         | O11   | 16 | 14 | 1 | 0 |
| 485 | transferrin detection Ab alt | P9    | 17 | 14 | 1 | 0 |
| 486 | Empty                        | Empty | 18 | 14 | 0 | 0 |
| 487 | Ncoa2                        | A17   | 19 | 14 | 0 | 0 |
| 488 | Psap                         | B15   | 20 | 14 | 0 | 0 |
| 489 | PERK                         | C13   | 21 | 14 | 0 | 0 |
| 490 | Spectrin beta-1              | D11   | 22 | 14 | 0 | 0 |
| 491 | Sortilin                     | E9    | 23 | 14 | 0 | 0 |
| 492 | RFP2                         | F7    | 24 | 14 | 0 | 0 |
| 493 | C/EBP?                       | G5    | 25 | 14 | 0 | 0 |
| 494 | PN13                         | H3    | 26 | 14 | 0 | 0 |
| 495 | CD1.1, Ly-38                 | I1    | 27 | 14 | 0 | 0 |
| 496 | Cd33/OAV1D                   | I23   | 28 | 14 | 0 | 0 |
| 497 | 4-1 BB (TKS-1)               | J21   | 29 | 14 | 0 | 0 |
| 498 | IL12 detection               | K19   | 30 | 14 | 0 | 0 |
| 499 | IP10 capture                 | L17   | 31 | 14 | 0 | 0 |
| 500 | ASGPR1                       | M15   | 32 | 14 | 0 | 1 |
| 501 | C4                           | N13   | 33 | 14 | 1 | 0 |
| 502 | ferritin heavy chain         | O11   | 34 | 14 | 1 | 0 |
| 503 | transferrin detection Ab alt | P9    | 35 | 14 | 1 | 0 |
| 504 | Empty                        | Empty | 36 | 14 | 0 | 0 |
| 505 | Psap                         | A15   | 1  | 15 | 0 | 0 |

|     |                  |       |    |    |   |   |
|-----|------------------|-------|----|----|---|---|
| 506 | Trem2            | B13   | 2  | 15 | 0 | 0 |
| 507 | PHD4             | C11   | 3  | 15 | 0 | 0 |
| 508 | ROS N-term       | D9    | 4  | 15 | 0 | 0 |
| 509 | IRE alpha        | E7    | 5  | 15 | 0 | 0 |
| 510 | FSTL1            | F5    | 6  | 15 | 0 | 0 |
| 511 | Axin             | G3    | 7  | 15 | 0 | 0 |
| 512 | PN11             | H1    | 8  | 15 | 0 | 0 |
| 513 | TNF              | H23   | 9  | 15 | 0 | 0 |
| 514 | Cd40             | I21   | 10 | 15 | 0 | 0 |
| 515 | CD4              | J19   | 11 | 15 | 0 | 0 |
| 516 | flagellin        | K17   | 12 | 15 | 0 | 0 |
| 517 | I-TAC detection  | L15   | 13 | 15 | 0 | 0 |
| 518 | CRP              | M13   | 14 | 15 | 1 | 0 |
| 519 | ceruloplasmin    | N11   | 15 | 15 | 1 | 0 |
| 520 | AFP              | O9    | 16 | 15 | 1 | 0 |
| 521 | MST1             | P7    | 17 | 15 | 0 | 1 |
| 522 | Empty            | Empty | 18 | 15 | 0 | 0 |
| 523 | Psap             | A15   | 19 | 15 | 0 | 0 |
| 524 | Trem2            | B13   | 20 | 15 | 0 | 0 |
| 525 | PHD4             | C11   | 21 | 15 | 0 | 0 |
| 526 | ROS N-term       | D9    | 22 | 15 | 0 | 0 |
| 527 | IRE alpha        | E7    | 23 | 15 | 0 | 0 |
| 528 | FSTL1            | F5    | 24 | 15 | 0 | 0 |
| 529 | Axin             | G3    | 25 | 15 | 0 | 0 |
| 530 | PN11             | H1    | 26 | 15 | 0 | 0 |
| 531 | TNF              | H23   | 27 | 15 | 0 | 0 |
| 532 | Cd40             | I21   | 28 | 15 | 0 | 0 |
| 533 | CD4              | J19   | 29 | 15 | 0 | 0 |
| 534 | flagellin        | K17   | 30 | 15 | 0 | 0 |
| 535 | I-TAC detection  | L15   | 31 | 15 | 0 | 0 |
| 536 | CRP              | M13   | 32 | 15 | 1 | 0 |
| 537 | ceruloplasmin    | N11   | 33 | 15 | 1 | 0 |
| 538 | AFP              | O9    | 34 | 15 | 1 | 0 |
| 539 | MST1             | P7    | 35 | 15 | 0 | 1 |
| 540 | Empty            | Empty | 36 | 15 | 0 | 0 |
| 541 | Scarb2           | A13   | 1  | 16 | 0 | 0 |
| 542 | Csf1r            | B11   | 2  | 16 | 0 | 0 |
| 543 | Guk 1            | C9    | 3  | 16 | 0 | 0 |
| 544 | RPL 26           | D7    | 4  | 16 | 0 | 0 |
| 545 | Integrin alpha 5 | E5    | 5  | 16 | 0 | 0 |
| 546 | LEMD2            | F3    | 6  | 16 | 0 | 0 |
| 547 | 14-3-3?          | G1    | 7  | 16 | 0 | 0 |
| 548 | YB-1             | G23   | 8  | 16 | 0 | 0 |

|     |                              |       |    |    |   |   |
|-----|------------------------------|-------|----|----|---|---|
| 549 | IL-6                         | H21   | 9  | 16 | 0 | 0 |
| 550 | CD3c                         | I19   | 10 | 16 | 0 | 0 |
| 551 | CD16/CD32                    | J17   | 11 | 16 | 0 | 0 |
| 552 | CDC42                        | K15   | 12 | 16 | 0 | 0 |
| 553 | JE capture                   | L13   | 13 | 16 | 0 | 0 |
| 554 | C3                           | M11   | 14 | 16 | 1 | 0 |
| 555 | ALDH4A1                      | N9    | 15 | 16 | 0 | 1 |
| 556 | albumin                      | O7    | 16 | 16 | 1 | 0 |
| 557 | SEC14L2                      | P5    | 17 | 16 | 0 | 0 |
| 558 | Empty                        | Empty | 18 | 16 | 0 | 0 |
| 559 | Scarb2                       | A13   | 19 | 16 | 0 | 0 |
| 560 | Csf1r                        | B11   | 20 | 16 | 0 | 0 |
| 561 | Guk 1                        | C9    | 21 | 16 | 0 | 0 |
| 562 | RPL 26                       | D7    | 22 | 16 | 0 | 0 |
| 563 | Integrin alpha 5             | E5    | 23 | 16 | 0 | 0 |
| 564 | LEMD2                        | F3    | 24 | 16 | 0 | 0 |
| 565 | 14-3-3?                      | G1    | 25 | 16 | 0 | 0 |
| 566 | YB-1                         | G23   | 26 | 16 | 0 | 0 |
| 567 | IL-6                         | H21   | 27 | 16 | 0 | 0 |
| 568 | CD3c                         | I19   | 28 | 16 | 0 | 0 |
| 569 | CD16/CD32                    | J17   | 29 | 16 | 0 | 0 |
| 570 | CDC42                        | K15   | 30 | 16 | 0 | 0 |
| 571 | JE capture                   | L13   | 31 | 16 | 0 | 0 |
| 572 | C3                           | M11   | 32 | 16 | 1 | 0 |
| 573 | ALDH4A1                      | N9    | 33 | 16 | 0 | 1 |
| 574 | albumin                      | O7    | 34 | 16 | 1 | 0 |
| 575 | SEC14L2                      | P5    | 35 | 16 | 0 | 0 |
| 576 | Empty                        | Empty | 36 | 16 | 0 | 0 |
| 577 | Csf1r                        | A11   | 1  | 17 | 0 | 0 |
| 578 | C4                           | B9    | 2  | 17 | 0 | 0 |
| 579 | Myeloperoxidase              | C7    | 3  | 17 | 0 | 0 |
| 580 | Nuclear Receptor Corepressor | D5    | 4  | 17 | 0 | 0 |
| 581 | ZAG                          | E3    | 5  | 17 | 0 | 0 |
| 582 | PTD                          | F1    | 6  | 17 | 0 | 0 |
| 583 | PN9                          | F23   | 7  | 17 | 0 | 0 |
| 584 | Presenilin 1                 | G21   | 8  | 17 | 0 | 0 |
| 585 | IL-12                        | H19   | 9  | 17 | 0 | 0 |
| 586 | Cd11b                        | I17   | 10 | 17 | 0 | 0 |
| 587 | CD32A                        | J15   | 11 | 17 | 0 | 0 |
| 588 | TGN38                        | K13   | 12 | 17 | 0 | 0 |
| 589 | IP10 detection               | L11   | 13 | 17 | 0 | 0 |
| 590 | RANTES detection             | M9    | 14 | 17 | 0 | 0 |
| 591 | AGT                          | N7    | 15 | 17 | 1 | 0 |

|     |                              |       |    |    |   |   |
|-----|------------------------------|-------|----|----|---|---|
| 592 | transferrin                  | O5    | 16 | 17 | 1 | 0 |
| 593 | AHSG                         | P3    | 17 | 17 | 1 | 0 |
| 594 | Empty                        | Empty | 18 | 17 | 0 | 0 |
| 595 | Csf1r                        | A11   | 19 | 17 | 0 | 0 |
| 596 | C4                           | B9    | 20 | 17 | 1 | 0 |
| 597 | Myeloperoxidase              | C7    | 21 | 17 | 0 | 0 |
| 598 | Nuclear Receptor Corepressor | D5    | 22 | 17 | 0 | 0 |
| 599 | ZAG                          | E3    | 23 | 17 | 0 | 0 |
| 600 | PTD                          | F1    | 24 | 17 | 0 | 0 |
| 601 | PN9                          | F23   | 25 | 17 | 0 | 0 |
| 602 | Presenilin 1                 | G21   | 26 | 17 | 0 | 0 |
| 603 | IL-12                        | H19   | 27 | 17 | 0 | 0 |
| 604 | Cd11b                        | I17   | 28 | 17 | 0 | 0 |
| 605 | CD32A                        | J15   | 29 | 17 | 0 | 0 |
| 606 | TGN38                        | K13   | 30 | 17 | 0 | 0 |
| 607 | IP10 detection               | L11   | 31 | 17 | 0 | 0 |
| 608 | RANTES detection             | M9    | 32 | 17 | 0 | 0 |
| 609 | AGT                          | N7    | 15 | 17 | 1 | 0 |
| 610 | transferrin                  | O5    | 16 | 17 | 1 | 0 |
| 611 | AHSG                         | P3    | 17 | 17 | 1 | 0 |
| 612 | Empty                        | Empty | 18 | 17 | 0 | 0 |
| 613 | Csf1r                        | A11   | 19 | 17 | 0 | 0 |
| 614 | C4                           | B9    | 20 | 17 | 1 | 0 |
| 615 | MGST3                        | C5    | 3  | 18 | 0 | 0 |
| 616 | Intersectin/ESE-1            | D3    | 4  | 18 | 0 | 0 |
| 617 | Zyxin (C-19)                 | E1    | 5  | 18 | 0 | 0 |
| 618 | FOXA1                        | E23   | 6  | 18 | 0 | 0 |
| 619 | PN7                          | F21   | 7  | 18 | 0 | 0 |
| 620 | Nucleoporin p62              | G19   | 8  | 18 | 0 | 0 |
| 621 | IL-10                        | H17   | 9  | 18 | 0 | 0 |
| 622 | IL10                         | I15   | 10 | 18 | 0 | 0 |
| 623 | CD8a                         | J13   | 11 | 18 | 0 | 0 |
| 624 | Rab5                         | K11   | 12 | 18 | 0 | 0 |
| 625 | RANTES capture               | L9    | 13 | 18 | 0 | 0 |
| 626 | MCP-5 capture                | M7    | 14 | 18 | 0 | 0 |
| 627 | TDO2                         | N5    | 15 | 18 | 0 | 1 |
| 628 | TfR2                         | O3    | 16 | 18 | 0 | 1 |
| 629 | Afm                          | P1    | 17 | 18 | 0 | 1 |
| 630 | C3 (from chicken)            | P23   | 18 | 18 | 1 | 0 |
| 631 | C4                           | A9    | 19 | 18 | 1 | 0 |
| 632 | Apod                         | B7    | 20 | 18 | 1 | 0 |
| 633 | MGST3                        | C5    | 21 | 18 | 0 | 0 |
| 634 | Intersectin/ESE-1            | D3    | 22 | 18 | 0 | 0 |

|     |                   |     |    |    |   |   |
|-----|-------------------|-----|----|----|---|---|
| 635 | Zyxin (C-19)      | E1  | 23 | 18 | 0 | 0 |
| 636 | FOXA1             | E23 | 24 | 18 | 0 | 0 |
| 637 | PN7               | F21 | 25 | 18 | 0 | 0 |
| 638 | Nucleoporin p62   | G19 | 26 | 18 | 0 | 0 |
| 639 | IL-10             | H17 | 27 | 18 | 0 | 0 |
| 640 | IL10              | I15 | 28 | 18 | 0 | 0 |
| 641 | CD8a              | J13 | 29 | 18 | 0 | 0 |
| 642 | Rab5              | K11 | 30 | 18 | 0 | 0 |
| 643 | RANTES capture    | L9  | 31 | 18 | 0 | 0 |
| 644 | MCP-5 capture     | M7  | 32 | 18 | 0 | 0 |
| 645 | TDO2              | N5  | 33 | 18 | 0 | 1 |
| 646 | TfR2              | O3  | 34 | 18 | 0 | 1 |
| 647 | Afm               | P1  | 35 | 18 | 0 | 1 |
| 648 | C3 (from chicken) | P23 | 36 | 18 | 1 | 0 |
| 649 | C1qc              | A7  | 1  | 19 | 0 | 0 |
| 650 | Shox2             | B5  | 2  | 19 | 0 | 0 |
| 651 | Emilin-1 (Y-13)   | C3  | 3  | 19 | 0 | 0 |
| 652 | Tenascin C        | D1  | 4  | 19 | 0 | 0 |
| 653 | PrxV              | D23 | 5  | 19 | 0 | 0 |
| 654 | LEMDZ             | E21 | 6  | 19 | 0 | 0 |
| 655 | PN5               | F19 | 7  | 19 | 0 | 0 |
| 656 | Muiti Uqbiquitin  | G17 | 8  | 19 | 0 | 0 |
| 657 | Pir-A/B           | H15 | 9  | 19 | 0 | 0 |
| 658 | FceR1 alpha       | I13 | 10 | 19 | 0 | 0 |
| 659 | CD54              | J11 | 11 | 19 | 0 | 0 |
| 660 | fibronctin        | K9  | 12 | 19 | 0 | 0 |
| 661 | IL12 capture      | L7  | 13 | 19 | 0 | 0 |
| 662 | GM-CSF capture    | M5  | 14 | 19 | 0 | 0 |
| 663 | MST1              | N3  | 15 | 19 | 0 | 1 |
| 664 | GST               | O1  | 16 | 19 | 0 | 0 |
| 665 | ASGR1             | O23 | 17 | 19 | 0 | 1 |
| 666 | C3 (from chicken) | P21 | 18 | 19 | 1 | 0 |
| 667 | C1qc              | A7  | 19 | 19 | 0 | 0 |
| 668 | Shox2             | B5  | 20 | 19 | 0 | 0 |
| 669 | Emilin-1 (Y-13)   | C3  | 21 | 19 | 0 | 0 |
| 670 | Tenascin C        | D1  | 22 | 19 | 0 | 0 |
| 671 | PrxV              | D23 | 23 | 19 | 0 | 0 |
| 672 | LEMDZ             | E21 | 24 | 19 | 0 | 0 |
| 673 | PN5               | F19 | 25 | 19 | 0 | 0 |
| 674 | Muiti Uqbiquitin  | G17 | 26 | 19 | 0 | 0 |
| 675 | Pir-A/B           | H15 | 27 | 19 | 0 | 0 |
| 676 | FceR1 alpha       | I13 | 28 | 19 | 0 | 0 |
| 677 | CD54              | J11 | 29 | 19 | 0 | 0 |



|     |                     |     |    |    |   |   |
|-----|---------------------|-----|----|----|---|---|
| 678 | fibronctin          | K9  | 30 | 19 | 0 | 0 |
| 679 | IL12 capture        | L7  | 31 | 19 | 0 | 0 |
| 680 | GM-CSF capture      | M5  | 32 | 19 | 0 | 0 |
| 681 | MST1                | N3  | 33 | 19 | 0 | 1 |
| 682 | GST                 | O1  | 34 | 19 | 0 | 0 |
| 683 | ASGR1               | O23 | 35 | 19 | 0 | 1 |
| 684 | C3 (from chicken)   | P21 | 36 | 19 | 1 | 0 |
| 685 | Ntng1               | A5  | 1  | 20 | 0 | 0 |
| 686 | Grm1                | B3  | 2  | 20 | 0 | 0 |
| 687 | DEFA1               | C1  | 3  | 20 | 0 | 0 |
| 688 | Map2K2              | C23 | 4  | 20 | 0 | 0 |
| 689 | DJ-1                | D21 | 5  | 20 | 0 | 0 |
| 690 | Ninein              | E19 | 6  | 20 | 0 | 0 |
| 691 | PN3                 | F17 | 7  | 20 | 0 | 0 |
| 692 | LEDGF               | G15 | 8  | 20 | 0 | 0 |
| 693 | IL-12               | H13 | 9  | 20 | 0 | 0 |
| 694 | NK1.1               | I11 | 10 | 20 | 0 | 0 |
| 695 | TLR2                | J9  | 11 | 20 | 0 | 0 |
| 696 | tubulin             | K7  | 12 | 20 | 0 | 0 |
| 697 | IL 1 beta detection | L5  | 13 | 20 | 0 | 0 |
| 698 | TNF alpha detection | M3  | 14 | 20 | 0 | 0 |
| 699 | HSD11B1             | N1  | 15 | 20 | 0 | 1 |
| 700 | arginase I          | N23 | 16 | 20 | 0 | 1 |
| 701 | transferrin coat Ab | O21 | 17 | 20 | 1 | 0 |
| 702 | CRP                 | P19 | 18 | 20 | 1 | 0 |
| 703 | Ntng1               | A5  | 19 | 20 | 0 | 0 |
| 704 | Grm1                | B3  | 20 | 20 | 0 | 0 |
| 705 | DEFA1               | C1  | 21 | 20 | 0 | 0 |
| 706 | Map2K2              | C23 | 22 | 20 | 0 | 0 |
| 707 | DJ-1                | D21 | 23 | 20 | 0 | 0 |
| 708 | Ninein              | E19 | 24 | 20 | 0 | 0 |
| 709 | PN3                 | F17 | 25 | 20 | 0 | 0 |
| 710 | LEDGF               | G15 | 26 | 20 | 0 | 0 |
| 711 | IL-12               | H13 | 27 | 20 | 0 | 0 |
| 712 | NK1.1               | I11 | 28 | 20 | 0 | 0 |
| 713 | TLR2                | J9  | 29 | 20 | 0 | 0 |
| 714 | tubulin             | K7  | 30 | 20 | 0 | 0 |
| 715 | IL 1 beta detection | L5  | 31 | 20 | 0 | 0 |
| 716 | TNF alpha detection | M3  | 32 | 20 | 0 | 0 |
| 717 | HSD11B1             | N1  | 33 | 20 | 0 | 0 |
| 718 | arginase I          | N23 | 34 | 20 | 0 | 1 |
| 719 | transferrin coat Ab | O21 | 35 | 20 | 1 | 0 |
| 720 | CRP                 | P19 | 36 | 20 | 1 | 0 |

|     |                   |     |    |    |   |   |
|-----|-------------------|-----|----|----|---|---|
| 721 | Gc                | A3  | 1  | 21 | 1 | 0 |
| 722 | Trem2             | B1  | 2  | 21 | 0 | 0 |
| 723 | ubiquitin         | B23 | 3  | 21 | 0 | 0 |
| 724 | Ube2N             | C21 | 4  | 21 | 0 | 0 |
| 725 | CD 63             | D19 | 5  | 21 | 0 | 0 |
| 726 | FAAH              | E17 | 6  | 21 | 0 | 0 |
| 727 | PN1               | F15 | 7  | 21 | 0 | 0 |
| 728 | KAP-1             | G13 | 8  | 21 | 0 | 0 |
| 729 | H-2k              | H11 | 9  | 21 | 0 | 0 |
| 730 | I-Ab              | I9  | 10 | 21 | 0 | 0 |
| 731 | m-r               | J7  | 11 | 21 | 0 | 0 |
| 732 | caspase-1         | K5  | 12 | 21 | 0 | 0 |
| 733 | IL4 capture       | L3  | 13 | 21 | 0 | 0 |
| 734 | MIG capture       | M1  | 14 | 21 | 0 | 0 |
| 735 | HPX               | M23 | 15 | 21 | 1 | 0 |
| 736 | antitrypsin       | N21 | 16 | 21 | 1 | 0 |
| 737 | BAAT              | O19 | 17 | 21 | 0 | 1 |
| 738 | albumin coat Ab   | P17 | 18 | 21 | 1 | 0 |
| 739 | Gc                | A3  | 19 | 21 | 1 | 0 |
| 740 | Trem2             | B1  | 20 | 21 | 0 | 0 |
| 741 | ubiquitin         | B23 | 21 | 21 | 0 | 0 |
| 742 | Ube2N             | C21 | 22 | 21 | 0 | 0 |
| 743 | CD 63             | D19 | 23 | 21 | 0 | 0 |
| 744 | FAAH              | E17 | 24 | 21 | 0 | 0 |
| 745 | PN1               | F15 | 25 | 21 | 0 | 0 |
| 746 | KAP-1             | G13 | 26 | 21 | 0 | 0 |
| 747 | H-2k              | H11 | 27 | 21 | 0 | 0 |
| 748 | I-Ab              | I9  | 28 | 21 | 0 | 0 |
| 749 | m-r               | J7  | 29 | 21 | 0 | 0 |
| 750 | caspase-1         | K5  | 30 | 21 | 0 | 0 |
| 751 | IL4 capture       | L3  | 31 | 21 | 0 | 0 |
| 752 | MIG capture       | M1  | 32 | 21 | 0 | 0 |
| 753 | HPX               | M23 | 33 | 21 | 1 | 0 |
| 754 | antitrypsin       | N21 | 34 | 21 | 1 | 0 |
| 755 | BAAT              | O19 | 35 | 21 | 0 | 1 |
| 756 | albumin coat Ab   | P17 | 36 | 21 | 1 | 0 |
| 757 | Cst3              | A1  | 1  | 22 | 0 | 0 |
| 758 | Apoa2             | A23 | 2  | 22 | 1 | 0 |
| 759 | Aldoc             | B21 | 3  | 22 | 0 | 1 |
| 760 | L- Plastin (E-17) | C19 | 4  | 22 | 0 | 0 |
| 761 | Zyxin             | D17 | 5  | 22 | 0 | 0 |
| 762 | TSTA3             | E15 | 6  | 22 | 0 | 0 |
| 763 | NSE               | F13 | 7  | 22 | 0 | 0 |

|     |                   |             |    |    |   |   |
|-----|-------------------|-------------|----|----|---|---|
| 764 | HAI-1             | G11         | 8  | 22 | 0 | 0 |
| 765 | PN19              | H9          | 9  | 22 | 0 | 0 |
| 766 | CD14 (monocyte)   | I7          | 10 | 22 | 0 | 0 |
| 767 | CD3e              | J5          | 11 | 22 | 0 | 0 |
| 768 | Actin             | K3          | 12 | 22 | 0 | 0 |
| 769 | IL6 MP 520F3      | L1          | 13 | 22 | 0 | 0 |
| 770 | MIP2 capture      | L23         | 14 | 22 | 0 | 0 |
| 771 | DPYS              | M21         | 15 | 22 | 0 | 1 |
| 772 | serum amyloid A   | N19         | 16 | 22 | 0 | 0 |
| 773 | FGL1              | O17         | 17 | 22 | 0 | 1 |
| 774 | ASGPR2            | P15         | 18 | 22 | 0 | 1 |
| 775 | Cst3              | A1          | 19 | 22 | 0 | 0 |
| 776 | Apoa2             | A23         | 20 | 22 | 1 | 0 |
| 777 | Aldoc             | B21         | 21 | 22 | 0 | 1 |
| 778 | L- Plastin (E-17) | C19         | 22 | 22 | 0 | 0 |
| 779 | Zyxin             | D17         | 23 | 22 | 0 | 0 |
| 780 | TSTA3             | E15         | 24 | 22 | 0 | 0 |
| 781 | NSE               | F13         | 25 | 22 | 0 | 0 |
| 782 | HAI-1             | G11         | 26 | 22 | 0 | 0 |
| 783 | PN19              | H9          | 27 | 22 | 0 | 0 |
| 784 | CD14 (monocyte)   | I7          | 28 | 22 | 0 | 0 |
| 785 | CD3e              | J5          | 29 | 22 | 0 | 0 |
| 786 | Actin             | K3          | 30 | 22 | 0 | 0 |
| 787 | IL6 MP 520F3      | L1          | 31 | 22 | 0 | 0 |
| 788 | MIP2 capture      | L23         | 32 | 22 | 0 | 0 |
| 789 | DPYS              | M21         | 33 | 22 | 0 | 1 |
| 790 | serum amyloid A   | N19         | 34 | 22 | 0 | 0 |
| 791 | FGL1              | O17         | 35 | 22 | 0 | 1 |
| 792 | ASGPR2            | P15         | 36 | 22 | 0 | 1 |
| 793 | Background        | Background1 | 0  | 0  | 0 | 0 |
| 794 | Background        | Background2 | 0  | 0  | 0 | 0 |
| 795 | Background        | Background3 | 0  | 0  | 0 | 0 |
| 796 | Background        | Background4 | 0  | 0  | 0 | 0 |
| 797 | Background        | Background5 | 0  | 0  | 0 | 0 |
| 798 | Background        | Background6 | 0  | 0  | 0 | 0 |

**Table S3B. Description of SPRI microarray Set B containing 50 printed features.** NCBI UniGene numbers are provided for the human form of the target protein. The types of antigen recognized by the antibody is given in the "Antigen" column using the abbreviations H, M, R, and P for human, mouse, rat, and pig, respectively, and based on data from the manufacturers. The "Host" column indicates the host used to raise the antibody.

| Position | Antibody target    | UniGene ID | Internal ID | Clonality | Host    | Antigen | Vendor               | Catalog       |
|----------|--------------------|------------|-------------|-----------|---------|---------|----------------------|---------------|
| 0        | Background         | NA         | BG          | NA        | NA      | NA      | NA                   | NA            |
| 1        | C3                 | Mm.19131   | Hu1         | Poly      | Goat    | M       | Immun. Consult. Lab. | GC3-90A       |
| 2        | CRP                | Mm.260770  | Hu3         | Mono      | Mouse   | H,M,P   | R&D systems          | MAB1707       |
| 3        | AQP9               | Mm.335570  | Hu4         | Poly      | Rabbit  | R,M,H   | ADI                  | AQP91-A       |
| 4        | ASGR1              | Mm.6559    | Hu5         | Poly      | Goat    | H,M,R   | Santa Cruz Bio.      | sc-13467      |
| 5        | Background         | NA         | BG          | NA        | NA      | NA      | NA                   | NA            |
| 6        | ASGR2              | Mm.1357    | Hu6         | Poly      | Goat    | M,R,H   | Santa Cruz Bio.      | sc-13471      |
| 7        | HMGCS2             | Mm.289131  | Hu7         | Poly      | Chicken | H,M,R   | Genway               | 15-288-22653  |
| 8        | CAT (Catalase)     | Mm.2605    | Hu8         | Poly      | Rabbit  | H,M     | Calbiochem           | 219010        |
| 9        | DPYS               | Mm.275974  | Hu11        | NA        | NA      | NA      | NA                   | NA            |
| 10       | Background         | NA         | BG          | NA        | NA      | NA      | NA                   | NA            |
| 11       | HPX                | Mm.3485    | Hu13        | Poly      | Mouse   | H       | Novus                | H00001807-A01 |
| 12       | HSD11B1            | Mm.13000   | Hu15        | Poly      | Mouse   | H       | Novus                | H00003290-A01 |
| 13       | MST1               | Mm.8369    | Hu69        | NA        | NA      | NA      | NA                   | NA            |
| 14       | PON1               | Mm.389078  | Hu18        | Poly      | Mouse   | H       | Novus                | H00005444-A01 |
| 15       | Background         | NA         | BG          | NA        | NA      | NA      | NA                   | NA            |
| 16       | TDO2               | Mm.258622  | Hu19        | Poly      | Mouse   | H       | Novus                | H00006999-A01 |
| 17       | ALDH4A1            | Mm.4517    | Hu22        | Poly      | Mouse   | H       | Abnova               | H00008659-A01 |
| 18       | ARG1 (Arginase)    | Mm.154144  | Hu37        | Mono      | Mouse   | M,R     | BD                   | 610708        |
| 19       | CP (Ceruloplasmin) | Mm.13787   | Hu38        | Mono      | Mouse   | H,M,R   | BD                   | 611488        |
| 20       | Background         | NA         | BG          | NA        | NA      | NA      | NA                   | NA            |
| 21       | GST                | Mm.37214   | Hu40        | Mono      | Mouse   | ALL     | Cell Signaling       | 2624          |
| 22       | TFR2               | Mm.21757   | Hu42        | Poly      | Rabbit  | M       | ADI                  | TFR21-A       |
| 23       | TF (Transferrin)   | Mm.37214   | Hu31        | Poly      | Chicken | H,R,M   | Genway               | 15-288-20009F |
| 24       | ALB (Albumin)      | Mm.16773   | Hu45        | Poly      | Goat    | M       | Immun. Consult. Lab. | GAL-90A       |
| 25       | Background         | NA         | BG          | NA        | NA      | NA      | NA                   | NA            |
| 26       | ASGR2              | Mm.1357    | Hu77        | Poly      | Goat    | H       | Santa Cruz Bio.      | sc-13472      |
| 27       | TF (Transferrin)   | Mm.37214   | Hu43        | Poly      | Goat    | M       | Immun. Consult. Lab. | GTX-90A       |
| 28       | TF (Transferrin)   | Mm.37214   | Hu81        | Mono      | Mouse   | H       | AbD Serotec          | 9100-1055     |

|    |                      |           |       |      |         |       |                        |               |
|----|----------------------|-----------|-------|------|---------|-------|------------------------|---------------|
| 29 | ALB<br>(Albumin)     | Mm.16773  | HuAAC | NA   | NA      | NA    | NA                     | NA            |
| 30 | Background           | NA        | BG    | NA   | NA      | NA    | NA                     | NA            |
| 31 | PLG<br>(Plasminogen) | Mm.971    | Hu48  | Poly | Rabbit  | M     | Innovative<br>Research | IASMPLG-GF    |
| 32 | PLG<br>(Plasminogen) | Mm.971    | Hu131 | Mono | Rat     | M     | R&D Systems            | MAB742        |
| 33 | GNMT                 | Mm.29395  | Hu101 | Poly | Rabbit  | H     | Abgent                 | AP1076a       |
| 34 | RBP4                 | Mm.2605   | Hu53  | Mono | Mouse   | H     | Novus                  | H00005950-M01 |
| 35 | Background           | NA        | BG    | NA   | NA      | NA    | NA                     | NA            |
| 36 | CPS1                 | Mm.343942 | Hu24  | Mono | Mouse   | H     | Abnova                 | H00001373-M01 |
| 37 | ALDOB                | Mm.218862 | Hu10  | Mono | Mouse   | H     | Novus                  | H00000229-M01 |
| 38 | FGA<br>(Fibrinogen)  | Mm.88793  | Hu36  | Poly | Chicken | H,R,M | Genway                 | 15-288-22856  |
| 39 | FGL1                 | Mm.277955 | Hu55  | Mono | Mouse   | H     | Novus                  | H00002267-M01 |
| 40 | Background           | NA        | BG    | NA   | NA      | NA    | NA                     | NA            |
| 41 | HP<br>(Haptoglobin)  | Mm.26730  | Hu32  | Poly | Chicken | H,R,M | Genway                 | 15-288-20080F |
| 42 | MST1                 | Mm.8369   | Hu69  | Mono | Mouse   | H     | Novus                  | H00004485-M01 |
| 43 | ADH4                 | Mm.158750 | Hu112 | Mono | Mouse   | H     | Novus                  | H00000127-M01 |
| 44 | ASGR1                | Mm.6559   | Hu75  | Poly | Goat    | M,R   | Santa Cruz<br>Bio.     | sc-13469      |
| 45 | Background           | NA        | BG    | NA   | NA      | NA    | NA                     | NA            |
| 46 | KNG1                 | Mm.2160   | Hu106 | Poly | Rabbit  | H     | Atlas<br>Antibodies    | HPA001616     |
| 47 | AST (GOT1)           | Mm.423078 | Hu87  | Poly | sheep   | P     | ABR                    | PA1-23063     |
| 48 | ALT (GPT1)           | Mm.30130  | Hu88  | Mono | Mouse   | H     | Novus                  | H00002875-M03 |
| 49 | BAAT                 | Mm.2859   | Hu104 | Poly | Rabbit  | H     | Bethyl Lab.            | A300-727A     |

**Table S3C. Profiling the time course with SPRI.** Relative concentrations of the targeted proteins were determined by curve-fitting the binding responses of six mouse plasma samples. Concentrations c0-c5 correspond to samples taken 1, 3, 12, 24, 48, and 72 hours after treatment with APAP. Rmax, kon, and koff indicate the calculated maximal SPR response, kinetic on-rate and kinetic off-rate, respectively. The Rmax parameter floor was set to 20; values of 20 indicate no binding was detected.

| Position | Antibody target | c0       | c1       | c2       | c3       | c4       | c5       | Rmax | kon    | koff     |
|----------|-----------------|----------|----------|----------|----------|----------|----------|------|--------|----------|
| 0        | Background      | 1.56e-06 | 4.9e-08  | 2.27e-07 | 1.02e-12 | 1e-12    | 3.94e-07 | 20   | 1820   | 0.00114  |
| 1        | C3              | 1.47e-06 | 1.04e-06 | 9.87e-07 | 9.22e-07 | 1.06e-06 | 1.08e-06 | 103  | 10400  | 0.000514 |
| 2        | CRP             | 1.28e-06 | 1.53e-12 | 3.42e-07 | 1.07e-12 | 1.5e-12  | 8.37e-07 | 420  | 10     | 1e-05    |
| 3        | AQP9            | 1.19e-11 | 1.49e-11 | 1.56e-11 | 1.56e-11 | 1.52e-11 | 1.68e-11 | 20   | 10     | 0.1      |
| 4        | ASGR1           | 1.1e-06  | 3.55e-06 | 4.65e-06 | 1.92e-06 | 1.3e-06  | 1.12e-06 | 289  | 1180   | 0.000116 |
| 5        | Background      | 1.42e-06 | 7.45e-09 | 1.24e-07 | 1e-12    | 1e-12    | 5.6e-07  | 20   | 1590   | 0.0014   |
| 6        | ASGR2           | 1.07e-06 | 3.38e-06 | 4.88e-06 | 1.92e-06 | 1.43e-06 | 1.17e-06 | 216  | 982    | 1e-05    |
| 7        | HMGCS2          | 1.23e-06 | 6.67e-06 | 6.35e-06 | 3.78e-06 | 1.34e-06 | 8.61e-07 | 148  | 1200   | 0.000336 |
| 8        | CAT             | 1.62e-06 | 2.52e-06 | 9.51e-07 | 2.73e-06 | 9.16e-07 | 4.88e-09 | 1660 | 10     | 1e-05    |
| 9        | DPYS            | 1.1e-06  | 1.99e-06 | 2.2e-06  | 1.12e-06 | 9.74e-07 | 1.12e-06 | 90.3 | 1150   | 0.000307 |
| 10       | Background      | 1.51e-06 | 1e-12    | 1.44e-07 | 1e-12    | 1e-12    | 4.94e-07 | 20   | 2160   | 0.00132  |
| 11       | HPX             | 1.18e-06 | 9.82e-07 | 9.39e-07 | 5.69e-07 | 8.56e-07 | 9.43e-07 | 20   | 1210   | 0.00119  |
| 12       | HSD11B1         | 1.3e-06  | 9.8e-07  | 5.6e-07  | 4.66e-07 | 3.91e-07 | 7.42e-07 | 20   | 2170   | 0.00577  |
| 13       | MST1            | 2.92e-06 | 1.29e-06 | 5.82e-07 | 5.36e-07 | 3.27e-07 | 3.48e-07 | 20   | 8810   | 0.00153  |
| 14       | PON1            | 1.28e-06 | 1.42e-06 | 7.07e-07 | 8.07e-07 | 5.87e-07 | 9.76e-07 | 60   | 573    | 0.00267  |
| 15       | Background      | 1.78e-06 | 1.38e-06 | 5.41e-07 | 2.27e-12 | 2.36e-12 | 3.17e-12 | 20   | 489    | 0.00209  |
| 16       | TDO2            | 1.8e-06  | 1.79e-06 | 8.25e-07 | 7.37e-07 | 5.31e-07 | 6.17e-07 | 27.6 | 6540   | 0.000677 |
| 17       | ALDH4A1         | 1.18e-06 | 9.11e-07 | 7.46e-07 | 9.01e-07 | 7.59e-07 | 1.01e-06 | 20   | 2110   | 0.000353 |
| 18       | ARG1            | 1.42e-06 | 2.4e-06  | 1.03e-06 | 6.02e-07 | 1e-12    | 4.39e-07 | 20   | 344    | 0.00182  |
| 19       | CP              | 1.34e-11 | 1.74e-11 | 1.5e-11  | 2.27e-11 | 1.02e-11 | 6.3e-12  | 20   | 10     | 0.1      |
| 20       | Background      | 1.64e-06 | 8.08e-07 | 7.64e-07 | 1e-12    | 1e-12    | 1.24e-07 | 20   | 819    | 0.00188  |
| 21       | GST             | 1.44e-06 | 1.79e-06 | 1.06e-06 | 2.09e-06 | 8.18e-07 | 3.63e-07 | 1100 | 10     | 1e-05    |
| 22       | TFR2            | 1.29e-06 | 1.22e-06 | 8.23e-07 | 1.09e-06 | 9.8e-07  | 6.72e-07 | 3000 | 10     | 1e-05    |
| 23       | TF              | 1.39e-06 | 1.34e-06 | 8.49e-07 | 8.9e-07  | 1.32e-06 | 1.28e-06 | 363  | 14200  | 0.00163  |
| 24       | ALB             | 1.82e-06 | 2.17e-06 | 2.24e-06 | 2.64e-06 | 2.26e-06 | 2.24e-06 | 211  | 100000 | 0.000992 |
| 25       | Background      | 1.56e-06 | 1.76e-07 | 2.61e-07 | 1.08e-12 | 1e-12    | 3.74e-07 | 20   | 1650   | 0.00123  |
| 26       | ASGR2           | 1.06e-06 | 1.06e-06 | 1.12e-06 | 9.01e-07 | 1.58e-06 | 1.17e-06 | 151  | 679    | 1e-05    |
| 27       | TF              | 1.53e-06 | 1.47e-06 | 1.06e-06 | 1e-06    | 1.16e-06 | 1.3e-06  | 136  | 21200  | 0.0011   |
| 28       | TF              | 1.43e-06 | 1.42e-06 | 8.82e-07 | 8.07e-07 | 1.17e-06 | 1.31e-06 | 80.6 | 13600  | 0.000312 |
| 29       | ALB             | 1.53e-06 | 2.04e-06 | 2.39e-06 | 2.96e-06 | 2.7e-06  | 2.86e-06 | 84.2 | 100000 | 0.000535 |
| 30       | Background      | 1.51e-06 | 5.55e-08 | 1.43e-07 | 1.05e-12 | 1e-12    | 4.63e-07 | 20   | 1970   | 0.0014   |
| 31       | PLG             | 1.23e-06 | 1.32e-06 | 5.26e-07 | 3.82e-07 | 1.27e-06 | 1.4e-06  | 341  | 8510   | 0.000489 |
| 32       | PLG             | 1.42e-06 | 1.45e-06 | 7.26e-07 | 5.77e-07 | 1.1e-06  | 1.32e-06 | 61.2 | 12000  | 0.000122 |
| 33       | GNMT            | 1.2e-06  | 2.8e-06  | 2.14e-06 | 3.69e-06 | 1.35e-06 | 9.06e-07 | 177  | 849    | 0.000145 |
| 34       | RBP4            | 1.51e-06 | 1.45e-06 | 6.86e-07 | 7.88e-07 | 1.16e-06 | 1.31e-06 | 119  | 16900  | 0.000612 |
| 35       | Background      | 1.4e-06  | 8.12e-08 | 1.17e-07 | 1e-12    | 1.01e-12 | 5.92e-07 | 20   | 1530   | 0.0011   |

|    |            |          |          |          |          |          |          |      |      |          |
|----|------------|----------|----------|----------|----------|----------|----------|------|------|----------|
| 36 | CPS1       | 1.17e-06 | 1.72e-06 | 2.23e-06 | 1.14e-06 | 1.13e-06 | 1.21e-06 | 87   | 4660 | 0.000284 |
| 37 | ALDOB      | 1.3e-06  | 2.64e-06 | 1.95e-06 | 2.83e-06 | 1.29e-06 | 7.44e-07 | 82.6 | 1400 | 0.000302 |
| 38 | FGA        | 1.45e-06 | 1.02e-06 | 1.01e-06 | 9.83e-07 | 1.06e-06 | 1.11e-06 | 108  | 9400 | 0.000124 |
| 39 | FGL1       | 1.38e-06 | 3.74e-07 | 4.05e-07 | 1e-12    | 1.36e-09 | 6.59e-07 | 20   | 2070 | 0.000874 |
| 40 | Background | 1.45e-06 | 3.33e-08 | 1.49e-07 | 1e-12    | 1e-12    | 5.3e-07  | 20   | 1790 | 0.00142  |
| 41 | HP         | 3.77e-06 | 6.91e-06 | 2.86e-06 | 1.61e-07 | 2.05e-12 | 1.85e-12 | 144  | 10   | 1e-05    |
| 42 | MST1       | 1.46e-06 | 2.04e-06 | 1.58e-06 | 1.58e-06 | 9.82e-07 | 5.15e-07 | 20   | 2290 | 0.00515  |
| 43 | ADH4       | 2.22e-06 | 7.56e-07 | 1.35e-12 | 7.45e-08 | 1e-12    | 1e-12    | 20   | 523  | 0.00308  |
| 44 | ASGR1      | 1.08e-06 | 1.2e-06  | 1.15e-06 | 1.05e-06 | 1.37e-06 | 1.15e-06 | 269  | 1070 | 8.4e-05  |
| 45 | Background | 1.48e-06 | 1e-12    | 1.9e-07  | 1e-12    | 1e-12    | 4.91e-07 | 20   | 1730 | 0.00137  |
| 46 | KNG1       | 2.4e-06  | 1.88e-06 | 7.72e-07 | 7.79e-07 | 2.9e-07  | 3.82e-07 | 20   | 7670 | 0.00166  |
| 47 | AST        | 1.36e-06 | 6.81e-07 | 1.58e-07 | 1e-06    | 7.78e-07 | 6.09e-07 | 20   | 1050 | 0.00194  |
| 48 | ALT        | 1.39e-06 | 9.18e-07 | 6.24e-07 | 9.57e-07 | 5.28e-07 | 5.89e-07 | 20   | 1690 | 0.00394  |
| 49 | BAAT       | 2.18e-12 | 2.46e-12 | 1.88e-12 | 1.85e-12 | 2e-12    | 1.21e-12 | 20   | 10   | 0.1      |

## Table S4. iTRAQ

**Table S4A. Peptides designed for iTRAQ analysis.** Three peptides were designed for each liver-specific target. Of the 85 peptides, 69 were successfully detected by MS.

| Gene Symbol | UniGene ID | Peptide Sequence    | Detected in MS |  | Gene Symbol | UniGene ID | Peptide Sequence    | Detected in MS |
|-------------|------------|---------------------|----------------|--|-------------|------------|---------------------|----------------|
| ADH4        | Mm.158750  | VDEMTIPTVDVILGR     | YES            |  | CRP         | Mm.260770  | AQGDVFIKPOLWS       | YES            |
| ADH4        | Mm.158750  | SINGTFFGGWK         | YES            |  | CRP         | Mm.260770  | AFVFPK              | no             |
| ADH4        | Mm.158750  | VDDEANLER           | YES            |  | FAH         | Mm.3798    | ASLQNLLSASQAR       | YES            |
| ALDOB       | Mm.218862  | ELSEIAQR            | YES            |  | FAH         | Mm.3798    | AHEHIFGMVLMNDWSAR   | YES            |
| ALDOB       | Mm.218862  | LSFSYGR             | YES            |  | FAH         | Mm.3798    | HLFTGPALSK          | YES            |
| ALDOB       | Mm.218862  | DSQGNLFR            | no             |  | FGA         | Mm.88793   | EINLQDYEGHQK        | YES            |
| APOA1       | Mm.26743   | VAPLGAELQESAR       | YES            |  | FGA         | Mm.88793   | LEVDDIDIK           | YES            |
| APOA1       | Mm.26743   | TQLAPHSEQMR         | YES            |  | FGA         | Mm.88793   | MELERPGK            | no             |
| APOA1       | Mm.26743   | LSPVAEEFR           | YES            |  | FGG         | Mm.16422   | YEALLLTHETSIR       | YES            |
| AQP9        | Mm.335570  | AEPAENMLEK          | YES            |  | FGG         | Mm.16422   | DSVQIHDTTGK         | YES            |
| AQP9        | Mm.335570  | HELSVIM             | YES            |  | FGG         | Mm.16422   | TLEDILFR            | YES            |
| AQP9        | Mm.335570  | NLGVPR              | no             |  | FTCD        | Mm.36278   | TASQLIDMSK          | YES            |
| ASGR1       | Mm.6559    | DEQNFLQR            | YES            |  | FTCD        | Mm.36278   | LFVLEEEHR           | YES            |
| ASGR1       | Mm.6559    | SLSCQMAAFR          | YES            |  | FTCD        | Mm.36278   | AGEYEALPEK          | YES            |
| ASGR1       | Mm.6559    | WNDDVCR             | no             |  | GCDH        | Mm.2475    | ATPEMVSMMLK         | YES            |
| ASGR2       | Mm.1357    | ADHSTLLFHLK         | YES            |  | GCDH        | Mm.2475    | IQFGVPLAR           | YES            |
| ASGR2       | Mm.1357    | IENPHWK             | YES            |  | GCDH        | Mm.2475    | DILGGNGISDEYHVIR    | YES            |
| ASGR2       | Mm.1357    | HFPMDLR             | no             |  | GCHFR       | Mm.86373   | SVLGNNFYEYVNDPPR    | YES            |
| ASL         | Mm.23869   | AEMQQLQLGLDK        | YES            |  | GCHFR       | Mm.86373   | VLSMTGVGQTLVWCLHKK  | YES            |
| ASL         | Mm.23869   | VAEWEAQGTFK         | YES            |  | GCHFR       | Mm.86373   | MPYLLISTQIR         | no             |
| ASL         | Mm.23869   | ELIGEAAAGK          | YES            |  | GNMT        | Mm.29395   | AHMVTLDYTVQVPGTGR   | YES            |
| ASS1        | Mm.3217    | YLLGTSLARPCAR       | YES            |  | GNMT        | Mm.29395   | VWQLYIGDTR          | YES            |
| ASS1        | Mm.3217    | FAELVYTGFWHSPECFVIR | no             |  | GNMT        | Mm.29395   | LSYYPHCLASFTELVR    | no             |
| ASS1        | Mm.3217    | MPEFYNR             | no             |  | GPT1 (ALT)  | Mm.30130   | LTEQVFNEAPGIR       | YES            |
| AZGP1       | Mm.30061   | AYLEEECPMLK         | YES            |  | GPT1 (ALT)  | Mm.30130   | ALELEQELR           | YES            |
| AZGP1       | Mm.30061   | GFSQSLSVQWDR        | YES            |  | GPT1 (ALT)  | Mm.30130   | GGYVEVVNMDAEVQK     | no             |
| AZGP1       | Mm.30061   | DENNVVAQPQ          | YES            |  | HPD         | Mm.6584    | DIAFEVEDCDHIVQK     | YES            |
| C3          | Mm.19131   | ACEPGVDYVYK         | YES            |  | HPD         | Mm.6584    | FLHFHSVTFWVGNAK     | no             |
| C3          | Mm.19131   | DLELLASGVDR         | YES            |  | HPD         | Mm.6584    | EMGDHLVK            | no             |
| C3          | Mm.19131   | EYVLPSEVR           | YES            |  | PCYT2       | Mm.21439   | ELAFLEATK           | YES            |
| CAT         | Mm.2605    | LCENIAGHLK          | YES            |  | PCYT2       | Mm.21439   | AMGDYLIVGVHTDEELAVK | YES            |
| CAT         | Mm.2605    | LFAYPDTHR           | YES            |  | PCYT2       | Mm.21439   | MLLVTK              | no             |
| CAT         | Mm.2605    | HMNGYGSHTFK         | no             |  | PEMT        | Mm.2731    | SHCFTQAMMSQPK       | YES            |
| CFB         | Mm.653     | DLEIEEVLHHPK        | YES            |  | PLG         | Mm.971     | VILGAHEEYIR         | YES            |



|      |           |                 |     |  |      |           |               |     |
|------|-----------|-----------------|-----|--|------|-----------|---------------|-----|
| CFB  | Mm.653    | LNQISYEDHK      | YES |  | PLG  | Mm.971    | GTVSVTVSGK    | YES |
| CFB  | Mm.653    | LEDIVTYHCSR     | YES |  | PLG  | Mm.971    | WEYCDIPR      | YES |
| CP   | Mm.13787  | DTANLFPHK       | YES |  | PON1 | Mm.389078 | LLIGTVFHK     | YES |
| CP   | Mm.13787  | IYTFHAHGVTYTK   | no  |  | PON1 | Mm.389078 | IQNILSEDPK    | YES |
| CP   | Mm.13787  | IYHSHVDAPK      | no  |  | PON1 | Mm.389078 | ILLMDLNK      | YES |
| CPS1 | Mm.343942 | VLGTSVESIMATEDR | YES |  | TF   | Mm.37214  | KPVDQYEDCYLAR | YES |
| CPS1 | Mm.343942 | FLGVAEQLHNEGFK  | YES |  | TF   | Mm.37214  | IPSHAVVAR     | YES |
| CPS1 | Mm.343942 | SIFSAVLDELK     | YES |  | TF   | Mm.37214  | HTTIFEVLPEK   | YES |
| CRP  | Mm.260770 | ESDTSYVSLEAESK  | YES |  |      |           |               |     |

**Table S4B. Peptides identification scores.**

The precursor charge, mass/charge ratio, and PeptideProphet probability score for each peptide sequence assigned is tabulated.

| PeptideProphet probability | spectrum                                | precursor charge | m/z      | peptide sequence | target peptide | gene symbol   |
|----------------------------|-----------------------------------------|------------------|----------|------------------|----------------|---------------|
| 0.3927                     | QS20070624_P0149_HY109_01.01265.01265.2 | 2                | 521.5353 | AGAEPAPER        | no             | KNG1          |
| 0.9253                     | QS20070624_P0149_HY109_01.01318.01318.2 | 2                | 482.991  | ASETLTAQ         | no             | APOA1         |
| 0.9538                     | QS20070624_P0149_HY109_01.01319.01319.2 | 2                | 629.6321 | DENNVVAQPQ       | YES            | AZGP1         |
| 0.8769                     | QS20070624_P0149_HY109_01.01373.01373.2 | 2                | 545.5778 | ELSEIAQR         | YES            | ALDOB         |
| 0.9752                     | QS20070624_P0149_HY109_01.01393.01393.2 | 2                | 597.6117 | DEQNFLQR         | YES            | ASGR1         |
| 0.998                      | QS20070624_P0149_HY109_01.01401.01401.2 | 2                | 716.2396 | VNADEVGGEALGR    | no             | HBB-B1        |
| 0.996                      | QS20070624_P0149_HY109_01.01466.01466.2 | 2                | 792.8734 | APQVSTPTLVEAAR   | no             | ALB           |
| 0.9946                     | QS20070624_P0149_HY109_01.01489.01489.2 | 2                | 725.7626 | QLEQQVEEFR       | no             | APOA4         |
| 1                          | QS20070624_P0149_HY109_01.01493.01493.2 | 2                | 743.3071 | VAPLGAELQESAR    | YES            | APOA1         |
| 0.9967                     | QS20070624_P0149_HY109_01.01513.01513.2 | 2                | 716.7537 | ATIDQNLEDLR      | no             | APOA4         |
| 0.8798                     | QS20070624_P0149_HY109_01.01543.01543.2 | 2                | 743.3071 | VAPLGAELQESAR    | YES            | APOA1         |
| 0.9989                     | QS20070624_P0149_HY109_01.01633.01633.2 | 2                | 865.9026 | DTCFSTEGPNLVTR   | no             | ALB           |
| 0.9976                     | QS20070624_P0149_HY109_01.01749.01749.2 | 2                | 556.0868 | VNSILGCSQ        | no             | HPXN          |
| 0.9826                     | QS20070624_P0149_HY109_02.00389.00389.2 | 2                | 610.6294 | EATTEQQLR        | no             | BHMT          |
| 0.9587                     | QS20070624_P0149_HY109_02.00394.00394.2 | 2                | 609.1291 | DGGQTAPASIR      | no             | GSN           |
| 0.1402                     | QS20070624_P0149_HY109_02.00407.00407.2 | 2                | 536.106  | RVAPLVK          | no             | FADS3         |
| 0.6058                     | QS20070624_P0149_HY109_02.00409.00409.2 | 2                | 529.0875 | RLNSPIGR         | no             | POLR2B        |
| 0.9936                     | QS20070624_P0149_HY109_02.00413.00413.2 | 2                | 629.6321 | DENNVVAQPQ       | YES            | AZGP1         |
| 0.2177                     | QS20070624_P0149_HY109_02.00415.00415.2 | 2                | 524.0234 | GSAPANETR        | no             | 1700084C01RIK |
| 0.9935                     | QS20070624_P0149_HY109_02.00417.00417.2 | 2                | 603.1004 | VDDEANLER        | YES            | ADH4          |
| 0.9746                     | QS20070624_P0149_HY109_02.00418.00418.2 | 2                | 628.6691 | LQDQPNIQR        | no             | PZP           |
| 0.887                      | QS20070624_P0149_HY109_02.00422.00422.2 | 2                | 482.991  | ASETLTAQ         | no             | APOA1         |
| 0.6357                     | QS20070624_P0149_HY109_02.00442.00442.2 | 2                | 494.5328 | LQELQGR          | no             | APOA1         |
| 0.9903                     | QS20070624_P0149_HY109_02.00447.00447.2 | 2                | 777.8169 | FSTSQSLPASQTR    | no             | MUG1          |
| 0.9181                     | QS20070624_P0149_HY109_02.00453.00453.2 | 2                | 545.5778 | ELSEIAQR         | YES            | ALDOB         |
| 0.9594                     | QS20070624_P0149_HY109_02.00471.00471.2 | 2                | 534.5527 | EDVELYR          | no             | APOA1         |
| 0.9935                     | QS20070624_P0149_HY109_02.00478.00478.2 | 2                | 597.6117 | DEQNFLQR         | YES            | ASGR1         |
| 0.4854                     | QS20070624_P0149_HY109_02.00479.00479.2 | 2                | 555.6162 | QLYTAITR         | no             | LBA1          |
| 1                          | QS20070624_P0149_HY109_02.00481.00481.2 | 2                | 716.2396 | VNADEVGGEALGR    | no             | HBB-B1        |
| 0.3073                     | QS20070624_P0149_HY109_02.00491.00491.2 | 2                | 597.6117 | DEQNFLQR         | YES            | ASGR1         |
| 0.1807                     | QS20070624_P0149_HY109_02.00494.00494.2 | 2                | 636.133  | LNSANGHEER       | no             | RBM39         |
| 0.9716                     | QS20070624_P0149_HY109_02.00517.00517.2 | 2                | 679.243  | FNPVTGEVPPR      | no             | HPXN          |
| 0.2136                     | QS20070624_P0149_HY109_02.00537.00537.2 | 2                | 532.56   | EVSAWATR         | no             | NUP155        |
| 0.9974                     | QS20070624_P0149_HY109_02.00541.00541.2 | 2                | 792.8734 | APQVSTPTLVEAAR   | no             | ALB           |
| 0.2941                     | QS20070624_P0149_HY109_02.00542.00542.2 | 2                | 815.9079 | DQTGGVLLVELSLR   | no             | TECTB         |
| 1                          | QS20070624_P0149_HY109_02.00565.00565.2 | 2                | 743.3071 | VAPLGAELQESAR    | YES            | APOA1         |
| 0.9944                     | QS20070624_P0149_HY109_02.00566.00566.2 | 2                | 725.7626 | QLEQQVEEFR       | no             | APOA4         |
| 0.182                      | QS20070624_P0149_HY109_02.00575.00575.3 | 3                | 585.929  | GDATVSYEDLPTAK   | no             | EG665146      |
| 0.9937                     | QS20070624_P0149_HY109_02.00583.00583.2 | 2                | 596.6456 | LSPVAEEFR        | YES            | APOA1         |
| 0.8837                     | QS20070624_P0149_HY109_02.00587.00587.2 | 2                | 679.243  | FNPVTGEVPPR      | no             | HPXN          |
| 0.9978                     | QS20070624_P0149_HY109_02.00590.00590.2 | 2                | 716.7537 | ATIDQNLEDLR      | no             | APOA4         |
| 0.4675                     | QS20070624_P0149_HY109_02.00593.00593.2 | 2                | 884.4833 | VLGTSELAPAVFFK   | no             | SCML2         |
| 0.9848                     | QS20070624_P0149_HY109_02.00607.00607.2 | 2                | 651.1658 | CCTLPEDQQR       | no             | ALB           |

|        |                                         |   |          |                          |     |               |
|--------|-----------------------------------------|---|----------|--------------------------|-----|---------------|
| 0.1032 | QS20070624_P0149_HY109_02.00610.00610.2 | 2 | 644.1978 | ALINSVQQNR               | no  | 2410003A14RIK |
| 1      | QS20070624_P0149_HY109_02.00613.00613.2 | 2 | 743.3071 | VAPLGAELQESAR            | YES | APOA1         |
| 0.9958 | QS20070624_P0149_HY109_02.00615.00615.2 | 2 | 887.9819 | MQQVEASLQPETLR           | no  | SERPINA3C     |
| 0.9891 | QS20070624_P0149_HY109_02.00623.00623.2 | 2 | 623.1761 | ALELEQELR                | YES | GPT1          |
| 0.3116 | QS20070624_P0149_HY109_02.00626.00626.2 | 2 | 635.6822 | SGVFPSNYVR               | no  | ITSN1         |
| 0.2225 | QS20070624_P0149_HY109_02.00651.00651.3 | 3 | 625.7054 | LCLMSGHEHQMSSK           | no  | DNAHC3        |
| 1      | QS20070624_P0149_HY109_02.00657.00657.2 | 2 | 809.882  | LTEQVFNEAPGIR            | YES | GPT1          |
| 0.9389 | QS20070624_P0149_HY109_02.00662.00662.2 | 2 | 617.6436 | DYFVSCPGR                | no  | HPXN          |
| 1      | QS20070624_P0149_HY109_02.00673.00673.2 | 2 | 865.9026 | DTCFSTEGPNLVTR           | no  | ALB           |
| 0.1955 | QS20070624_P0149_HY109_02.00674.00674.2 | 2 | 809.882  | LTEQVFNEAPGIR            | YES | GPT1          |
| 0.9976 | QS20070624_P0149_HY109_02.00685.00685.2 | 2 | 777.8181 | GFSQSLSVQWDR             | YES | AZGP1         |
| 0.9986 | QS20070624_P0149_HY109_02.00694.00694.2 | 2 | 752.3163 | ASLQNLLSASQAR            | YES | FAH           |
| 0.1577 | QS20070624_P0149_HY109_02.00695.00695.2 | 2 | 730.7682 | AQFGGQVLHSK              | no  | C79407        |
| 0.9838 | QS20070624_P0149_HY109_02.00698.00698.2 | 2 | 809.882  | LTEQVFNEAPGIR            | YES | GPT1          |
| 0.9835 | QS20070624_P0149_HY109_02.00699.00699.2 | 2 | 672.7439 | DAGTIAGLNVLR             | no  | HSPA8         |
| 0.988  | QS20070624_P0149_HY109_02.00701.00701.2 | 2 | 666.7152 | DLELLASGVDR              | YES | C3            |
| 0.8871 | QS20070624_P0149_HY109_02.00723.00723.2 | 2 | 573.162  | IQFVPLAR                 | YES | GCDH          |
| 0.9998 | QS20070624_P0149_HY109_02.00733.00733.3 | 3 | 829.2358 | TSCPPPPQINTQVIETVK       | no  | CFH           |
| 0.9211 | QS20070624_P0149_HY109_02.00754.00754.2 | 2 | 752.3163 | ASLQNLLSASQAR            | YES | FAH           |
| 0.2151 | QS20070624_P0149_HY109_02.00802.00802.2 | 2 | 735.8227 | GLPAPGPYSTPLR            | no  | RARA          |
| 0.1888 | QS20070624_P0149_HY109_02.00807.00807.2 | 2 | 741.79   | LWFGLSVDEK               | no  | DYSF          |
| 0.9383 | QS20070624_P0149_HY109_02.00813.00813.2 | 2 | 692.2604 | EYVLPSEVR                | YES | C3            |
| 0.2099 | QS20070624_P0149_HY109_02.00814.00814.2 | 2 | 843.9107 | LGATSSDVIEMK             | no  | SKIV2L2       |
| 0.9989 | QS20070624_P0149_HY109_02.00841.00841.2 | 2 | 876.9557 | VLGTSVESIMATEDR          | YES | CPS1          |
| 1      | QS20070624_P0149_HY109_02.00853.00853.2 | 2 | 931.471  | GECQSEGVLFFQGNR          | no  | HPXN          |
| 0.5679 | QS20070624_P0149_HY109_02.00867.00867.2 | 2 | 867.4261 | DNLSPLGQLTER             | no  | F2            |
| 0.9917 | QS20070624_P0149_HY109_02.00889.00889.2 | 2 | 666.7152 | DLELLASGVDR              | YES | C3            |
| 1      | QS20070624_P0149_HY109_02.00922.00922.3 | 3 | 731.4444 | SVLGNNFYEYYVNDPPR        | YES | GCHFR         |
| 0.928  | QS20070624_P0149_HY109_02.00933.00933.2 | 2 | 463.9891 | AVCEPFA                  | no  | MBL1          |
| 0.9981 | QS20070624_P0149_HY109_02.00947.00947.3 | 3 | 711.7682 | TVQDALSSVQESDIAVVAR      | no  | APOC3         |
| 0.9999 | QS20070624_P0149_HY109_02.00949.00949.3 | 3 | 711.7682 | TVQDALSSVQESDIAVVAR      | no  | APOC3         |
| 0.9939 | QS20070624_P0149_HY109_02.00951.00951.2 | 2 | 769.8386 | FVEGLPINDFSR             | no  | MDH1          |
| 0.9958 | QS20070624_P0149_HY109_02.00971.00971.2 | 2 | 945.9888 | EYCGVPGDGYEELIR          | no  | AMB           |
| 1      | QS20070624_P0149_HY109_02.00979.00979.3 | 3 | 731.4444 | SVLGNNFYEYYVNDPPR        | YES | GCHFR         |
| 0.9998 | QS20070624_P0149_HY109_02.01001.01001.3 | 3 | 731.4444 | SVLGNNFYEYYVNDPPR        | YES | GCHFR         |
| 0.9977 | QS20070624_P0149_HY109_02.01033.01033.2 | 2 | 824.9602 | LQALSPELLAPVPR           | no  | LRG1          |
| 0.413  | QS20070624_P0149_HY109_02.01042.01042.3 | 3 | 882.4009 | FVALFYTIITPMLNPLIYTLR    | no  | OLFR1388      |
| 1      | QS20070624_P0149_HY109_02.01045.01045.3 | 3 | 731.4444 | SVLGNNFYEYYVNDPPR        | YES | GCHFR         |
| 0.4539 | QS20070624_P0149_HY109_02.01046.01046.3 | 3 | 809.8521 | DLGSQTPQALTFNDGMSEVK     | no  | ZFP161        |
| 0.9874 | QS20070624_P0149_HY109_02.01047.01047.2 | 2 | 786.374  | VTIGLLSLDDPQR            | no  | ITI4          |
| 0.9998 | QS20070624_P0149_HY109_02.01071.01071.3 | 3 | 731.4444 | SVLGNNFYEYYVNDPPR        | YES | GCHFR         |
| 0.6454 | QS20070624_P0149_HY109_02.01085.01085.2 | 2 | 681.7781 | LVLDPYLLK                | no  | MRPS17        |
| 0.1927 | QS20070624_P0149_HY109_02.01111.01111.2 | 2 | 622.7356 | LLTCFMGLR                | no  | OASIA         |
| 0.1922 | QS20070624_P0149_HY109_02.01113.01113.3 | 3 | 858.1888 | HSQAEELGLEQPEAEETEEK     | no  | CEP164        |
| 1      | QS20070624_P0149_HY109_02.01205.01205.3 | 3 | 763.1722 | AVLDVAETGTEAAAAATGVIGGIR | no  | SERPINA3K     |
| 0.4385 | QS20070624_P0149_HY109_02.01221.01221.3 | 3 | 601.3171 | NGQYELIQLHGK             | no  | OCRL          |
| 1      | QS20070624_P0149_HY109_02.01273.01273.3 | 3 | 763.1722 | AVLDVAETGTEAAAAATGVIGGIR | no  | SERPINA3K     |
| 0.9996 | QS20070624_P0149_HY109_02.01375.01375.3 | 3 | 763.1722 | AVLDVAETGTEAAAAATGVIGGIR | no  | SERPINA3K     |
| 0.9998 | QS20070624_P0149_HY109_02.01386.01386.3 | 3 | 763.1722 | AVLDVAETGTEAAAAATGVIGGIR | no  | SERPINA3K     |

|        |                                         |   |          |                             |     |               |
|--------|-----------------------------------------|---|----------|-----------------------------|-----|---------------|
| 0.9629 | QS20070624_P0149_HY109_02.01393.01393.2 | 2 | 623.6465 | ETAFFELSSA                  | no  | MDH1          |
| 0.9818 | QS20070624_P0149_HY109_02.01401.01401.3 | 3 | 763.1722 | AVLDVAETGTEAAAAATGVIGGIR    | no  | SERPINA3K     |
| 0.9928 | QS20070624_P0149_HY109_02.01433.01433.2 | 2 | 783.3514 | YVNWIQQTIAAN                | no  | 2210010C04RIK |
| 0.3281 | QS20070624_P0149_HY109_02.01493.01493.2 | 2 | 783.3514 | YVNWIQQTIAAN                | no  | 2210010C04RIK |
| 0.9003 | QS20070624_P0149_HY109_02.01498.01498.3 | 3 | 763.1722 | AVLDVAETGTEAAAAATGVIGGIR    | no  | SERPINA3K     |
| 0.9995 | QS20070624_P0149_HY109_02.01526.01526.3 | 3 | 763.1722 | AVLDVAETGTEAAAAATGVIGGIR    | no  | SERPINA3K     |
| 0.9994 | QS20070624_P0149_HY109_02.01539.01539.3 | 3 | 763.1722 | AVLDVAETGTEAAAAATGVIGGIR    | no  | SERPINA3K     |
| 0.7647 | QS20070624_P0149_HY109_02.01650.01650.3 | 3 | 621.3164 | GECQSEGVLFFQGNR             | no  | HPXN          |
| 0.9985 | QS20070624_P0149_HY109_02.01769.01769.2 | 2 | 587.6569 | LLDVAELGSL                  | no  | LRG1          |
| 0.3794 | QS20070624_P0149_HY109_02.01821.01821.3 | 3 | 602.6128 | NCGYPGISPEDCASR             | no  | TFF2          |
| 1      | QS20070624_P0149_HY109_02.01825.01825.3 | 3 | 861.5891 | ELGSPGGISLETIDAAFSPGSSR     | no  | HPXN          |
| 0.9996 | QS20070624_P0149_HY109_02.01857.01857.3 | 3 | 861.5891 | ELGSPGGISLETIDAAFSPGSSR     | no  | HPXN          |
| 0.6249 | QS20070624_P0149_HY109_02.02010.02010.3 | 3 | 763.1722 | AVLDVAETGTEAAAAATGVIGGIR    | no  | SERPINA3K     |
| 0.9896 | QS20070624_P0149_HY109_03.00469.00469.3 | 3 | 497.1644 | DSVQIHDHTGK                 | YES | FGG           |
| 0.2045 | QS20070624_P0149_HY109_03.00470.00470.2 | 2 | 590.6021 | SVTVQETK                    | no  | KNG1          |
| 0.9919 | QS20070624_P0149_HY109_03.00486.00486.3 | 3 | 622.2762 | EESQAPEEAGSSGLGK            | no  | LOC433368     |
| 1      | QS20070624_P0149_HY109_03.00488.00488.2 | 2 | 612.1363 | GTVSVTVSGK                  | YES | PLG           |
| 0.3598 | QS20070624_P0149_HY109_03.00496.00496.2 | 2 | 562.056  | VGASTQSGK                   | no  | PITX2         |
| 1      | QS20070624_P0149_HY109_03.00497.00497.2 | 2 | 612.1363 | GTVSVTVSGK                  | YES | PLG           |
| 0.9916 | QS20070624_P0149_HY109_03.00516.00516.2 | 2 | 890.4024 | QAEFHVDESTTVK               | no  | SERPINA1E     |
| 0.8775 | QS20070624_P0149_HY109_03.00528.00528.2 | 2 | 588.6079 | ELIGEAAAGK                  | YES | ASL           |
| 0.1872 | QS20070624_P0149_HY109_03.00529.00529.2 | 2 | 834.8956 | SQAYLIGSIGVSGK              | no  | LOC676640     |
| 0.9882 | QS20070624_P0149_HY109_03.00536.00536.2 | 2 | 698.2063 | AGEYEALPEK                  | YES | FTCD          |
| 0.6123 | QS20070624_P0149_HY109_03.00540.00540.3 | 3 | 791.1791 | SGHEIWEFMSFTPAVK            | no  | NR1D2         |
| 1      | QS20070624_P0149_HY109_03.00549.00549.2 | 2 | 917.4021 | ESDTSYVLEAESK               | YES | CRP           |
| 1      | QS20070624_P0149_HY109_03.00552.00552.2 | 2 | 716.2396 | VNADEVGGEALGR               | no  | HBB-B1        |
| 1      | QS20070624_P0149_HY109_03.00553.00553.2 | 2 | 716.2396 | VNADEVGGEALGR               | no  | HBB-B1        |
| 0.9997 | QS20070624_P0149_HY109_03.00556.00556.3 | 3 | 569.8861 | TCVADESAANCDK               | no  | ALB           |
| 1      | QS20070624_P0149_HY109_03.00557.00557.2 | 2 | 854.3255 | TCVADESAANCDK               | no  | ALB           |
| 0.8593 | QS20070624_P0149_HY109_03.00558.00558.2 | 2 | 938.0545 | LCLMSGEHQMSK                | no  | DNAHC3        |
| 0.8477 | QS20070624_P0149_HY109_03.00565.00565.2 | 2 | 750.7849 | AAEVWMDDFK                  | no  | GALNT9        |
| 0.2813 | QS20070624_P0149_HY109_03.00572.00572.2 | 2 | 772.8612 | ADEEQLLVTLR                 | no  | LOC672646     |
| 0.9986 | QS20070624_P0149_HY109_03.00576.00576.2 | 2 | 701.2301 | DIPVDSPELK                  | no  | KNG1          |
| 0.1834 | QS20070624_P0149_HY109_03.00577.00577.2 | 2 | 775.3355 | AFNVELAQAGIK                | no  | 2310030N02RIK |
| 0.6309 | QS20070624_P0149_HY109_03.00578.00578.3 | 3 | 1137.534 | GVFMAGEEDGSLPQDHSESPQLDVLFK | no  | UNKNOWN       |
| 0.9915 | QS20070624_P0149_HY109_03.00580.00580.2 | 2 | 744.7909 | SVIVEPEGIEK                 | no  | PZP           |
| 1      | QS20070624_P0149_HY109_03.00581.00581.2 | 2 | 855.3858 | YMCENQATISSK                | no  | ALB           |
| 1      | QS20070624_P0149_HY109_03.00584.00584.2 | 2 | 888.9442 | AISESGVVINTNVGK             | no  | ES1           |
| 0.9987 | QS20070624_P0149_HY109_03.00585.00585.2 | 2 | 792.8734 | APQVSTPTLVEAAR              | no  | ALB           |
| 0.2685 | QS20070624_P0149_HY109_03.00586.00586.3 | 3 | 614.2982 | YFFDFLDEQAEK                | no  | PLXNB2        |
| 0.9131 | QS20070624_P0149_HY109_03.00590.00590.2 | 2 | 626.6515 | VNEAACDIAR                  | no  | BHMT          |
| 1      | QS20070624_P0149_HY109_03.00592.00592.2 | 2 | 691.7378 | TASQLIDMSK                  | YES | FTCD          |
| 1      | QS20070624_P0149_HY109_03.00593.00593.2 | 2 | 792.3223 | DFTPAAQAAFQK                | no  | HBB-B1        |
| 1      | QS20070624_P0149_HY109_03.00604.00604.2 | 2 | 743.3071 | VAPLGAELQESAR               | YES | APOA1         |
| 0.9925 | QS20070624_P0149_HY109_03.00605.00605.2 | 2 | 725.7626 | QLEQQVEEFR                  | no  | APOA4         |
| 0.3755 | QS20070624_P0149_HY109_03.00608.00608.2 | 2 | 773.8568 | FPLLQDQKR                   | no  | UNKNOWN       |
| 1      | QS20070624_P0149_HY109_03.00609.00609.3 | 3 | 645.6703 | KPVDQYEDCYLAR               | YES | TF            |
| 1      | QS20070624_P0149_HY109_03.00612.00612.2 | 2 | 886.4827 | VGQPGAAGVPSPMCPGR           | no  | AHSG          |
| 0.9981 | QS20070624_P0149_HY109_03.00613.00613.2 | 2 | 596.6456 | LSPVAEEFR                   | YES | APOA1         |

|        |                                         |   |          |                     |     |           |
|--------|-----------------------------------------|---|----------|---------------------|-----|-----------|
| 0.9984 | QS20070624_P0149_HY109_03.00616.00616.2 | 2 | 765.8327 | SLAPLTVGVQEK        | no  | APOA4     |
| 0.8948 | QS20070624_P0149_HY109_03.00617.00617.2 | 2 | 626.6568 | VINDFVEK            | no  | SP11-6    |
| 0.1051 | QS20070624_P0149_HY109_03.00622.00622.2 | 2 | 604.6266 | INNQFGNTR           | no  | MAGEE2    |
| 0.9813 | QS20070624_P0149_HY109_03.00624.00624.2 | 2 | 723.2582 | IQNLSSEDPK          | YES | PON1      |
| 0.8684 | QS20070624_P0149_HY109_03.00629.00629.2 | 2 | 723.2582 | IQNLSSEDPK          | YES | PON1      |
| 1      | QS20070624_P0149_HY109_03.00630.00630.2 | 2 | 789.8109 | ACEPGVDYVYK         | YES | C3        |
| 0.9679 | QS20070624_P0149_HY109_03.00636.00636.2 | 2 | 627.6647 | QLTSFIEK            | no  | GC        |
| 0.9982 | QS20070624_P0149_HY109_03.00638.00638.2 | 2 | 692.2669 | ITCPPPVPK           | no  | APOH      |
| 1      | QS20070624_P0149_HY109_03.00644.00644.3 | 3 | 754.1109 | AADKDTCFSTEGPNLVTR  | no  | ALB       |
| 0.4838 | QS20070624_P0149_HY109_03.00645.00645.2 | 2 | 716.7537 | ATIDQNLEDLR         | no  | APOA4     |
| 0.7108 | QS20070624_P0149_HY109_03.00648.00648.2 | 2 | 699.7298 | LSISGDYNLK          | no  | SERPINA1B |
| 0.9881 | QS20070624_P0149_HY109_03.00649.00649.2 | 2 | 661.187  | SELLESLNK           | no  | PZP       |
| 1      | QS20070624_P0149_HY109_03.00652.00652.2 | 2 | 698.288  | ATPEMVSMK           | YES | GCDH      |
| 0.9915 | QS20070624_P0149_HY109_03.00653.00653.2 | 2 | 689.7359 | YNILPVADGK          | no  | PZP       |
| 0.9916 | QS20070624_P0149_HY109_03.00656.00656.2 | 2 | 623.1761 | ALELEQELR           | YES | GPT1      |
| 1      | QS20070624_P0149_HY109_03.00658.00658.2 | 2 | 698.288  | ATPEMVSMK           | YES | GCDH      |
| 1      | QS20070624_P0149_HY109_03.00662.00662.2 | 2 | 801.3504 | NLAPLVEDVQSK        | no  | APOA4     |
| 1      | QS20070624_P0149_HY109_03.00664.00664.2 | 2 | 777.8016 | VAEEWAQGTK          | YES | ASL       |
| 0.1727 | QS20070624_P0149_HY109_03.00665.00665.2 | 2 | 647.1602 | AILTESENK           | no  | GOLGA4    |
| 0.3289 | QS20070624_P0149_HY109_03.00668.00668.3 | 3 | 632.6725 | QWGLLCDLLEQDK       | no  | EVC       |
| 0.996  | QS20070624_P0149_HY109_03.00672.00672.2 | 2 | 693.2738 | VLIVEPEGIK          | no  | MUG1      |
| 0.9952 | QS20070624_P0149_HY109_03.00676.00676.2 | 2 | 634.6564 | VDGALCLDK           | no  | HPXN      |
| 0.9281 | QS20070624_P0149_HY109_03.00677.00677.2 | 2 | 689.2203 | VPDITTEWK           | no  | PZP       |
| 0.1954 | QS20070624_P0149_HY109_03.00680.00680.2 | 2 | 740.7594 | NTLDSISSNIK         | no  | PROM1     |
| 0.9963 | QS20070624_P0149_HY109_03.00681.00681.2 | 2 | 727.7723 | GNLFMDINNK          | no  | KNG1      |
| 0.99   | QS20070624_P0149_HY109_03.00682.00682.2 | 2 | 753.3074 | LPDLPNGYVTK         | no  | PZP       |
| 0.9983 | QS20070624_P0149_HY109_03.00685.00685.2 | 2 | 668.2183 | NPITSVDAAFR         | no  | HPXN      |
| 0.4245 | QS20070624_P0149_HY109_03.00688.00688.2 | 2 | 848.9516 | AEMLEIVQAIYK        | no  | NCALD     |
| 1      | QS20070624_P0149_HY109_03.00689.00689.2 | 2 | 809.882  | LTEQVFNEAPGIR       | YES | GPT1      |
| 0.8375 | QS20070624_P0149_HY109_03.00690.00690.2 | 2 | 825.8651 | GSQLLSSGSDGLLK      | no  | TBL3      |
| 0.9878 | QS20070624_P0149_HY109_03.00693.00693.2 | 2 | 617.2229 | TLMSPLGTR           | no  | SP11-6    |
| 1      | QS20070624_P0149_HY109_03.00696.00696.2 | 2 | 765.2967 | DFANVYVDAVK         | no  | APOA1     |
| 1      | QS20070624_P0149_HY109_03.00700.00700.2 | 2 | 752.3163 | ASLQNLSSASQAR       | YES | FAH       |
| 0.9938 | QS20070624_P0149_HY109_03.00701.00701.2 | 2 | 617.6436 | DYFVSCPGR           | no  | HPXN      |
| 0.868  | QS20070624_P0149_HY109_03.00702.00702.2 | 2 | 632.684  | GPDSVFLIK           | no  | HPXN      |
| 0.994  | QS20070624_P0149_HY109_03.00704.00704.2 | 2 | 711.2929 | MNEETASLLLR         | no  | ES1       |
| 0.9797 | QS20070624_P0149_HY109_03.00705.00705.2 | 2 | 952.0179 | DILGGNGISDEYHVIR    | YES | GCDH      |
| 0.9894 | QS20070624_P0149_HY109_03.00708.00708.2 | 2 | 573.162  | IQFVPLAR            | YES | GCDH      |
| 0.1184 | QS20070624_P0149_HY109_03.00710.00710.2 | 2 | 1013.563 | EVVCTENLTPWKK       | no  | PIGT      |
| 1      | QS20070624_P0149_HY109_03.00721.00721.2 | 2 | 655.6968 | ELAFLEATK           | YES | PCYT2     |
| 1      | QS20070624_P0149_HY109_03.00728.00728.2 | 2 | 655.6968 | ELAFLEATK           | YES | PCYT2     |
| 0.2888 | QS20070624_P0149_HY109_03.00729.00729.2 | 2 | 610.1572 | ENLEISLTR           | no  | CDC25A    |
| 0.9984 | QS20070624_P0149_HY109_03.00730.00730.2 | 2 | 719.7622 | LVQEVTDFAK          | no  | ALB       |
| 0.999  | QS20070624_P0149_HY109_03.00733.00733.3 | 3 | 437.467  | ELAFLEATK           | YES | PCYT2     |
| 0.9913 | QS20070624_P0149_HY109_03.00734.00734.2 | 2 | 777.8181 | GFSQSLSVQWDR        | YES | AZGP1     |
| 0.9752 | QS20070624_P0149_HY109_03.00736.00736.2 | 2 | 752.3163 | ASLQNLSSASQAR       | YES | FAH       |
| 0.9998 | QS20070624_P0149_HY109_03.00737.00737.3 | 3 | 729.7716 | DQSPASHEIATNLGDFALR | no  | SERPINA1D |
| 0.9973 | QS20070624_P0149_HY109_03.00741.00741.2 | 2 | 845.3829 | ETFTYEWTVPK         | no  | CP        |
| 0.1939 | QS20070624_P0149_HY109_03.00742.00742.2 | 2 | 660.673  | DAEVGSNLVK          | no  | BCMO1     |

|        |                                         |   |          |                              |     |           |
|--------|-----------------------------------------|---|----------|------------------------------|-----|-----------|
| 0.9986 | QS20070624_P0149_HY109_03.00744.00744.2 | 2 | 952.0013 | FSSSTFEQVNLVVK               | no  | GC        |
| 0.9975 | QS20070624_P0149_HY109_03.00745.00745.2 | 2 | 736.8652 | MSLVLPPTVVK                  | no  | MUG2      |
| 0.9302 | QS20070624_P0149_HY109_03.00748.00748.2 | 2 | 732.8105 | TLDNDIMLIK                   | no  | TRY10L    |
| 0.9954 | QS20070624_P0149_HY109_03.00749.00749.2 | 2 | 688.7662 | ALVQQLEQFR                   | no  | APOA4     |
| 0.4194 | QS20070624_P0149_HY109_03.00753.00753.2 | 2 | 732.8105 | TLDNDIMLIK                   | no  | TRY10L    |
| 0.9944 | QS20070624_P0149_HY109_03.00757.00757.2 | 2 | 666.7152 | DLELLASGVDR                  | YES | C3        |
| 0.7297 | QS20070624_P0149_HY109_03.00758.00758.2 | 2 | 648.6798 | VSLFGSNGNTR                  | no  | PNLIPRP1  |
| 0.9607 | QS20070624_P0149_HY109_03.00761.00761.2 | 2 | 633.1762 | LPECLEVK                     | no  | APOH      |
| 0.9927 | QS20070624_P0149_HY109_03.00772.00772.3 | 3 | 816.8531 | ALYQTEAFTADFQQPTEAK          | no  | SERPINA3K |
| 1      | QS20070624_P0149_HY109_03.00776.00776.2 | 2 | 1146.706 | IFNNGADLSGITEENAPLK          | no  | SPI1-6    |
| 0.9627 | QS20070624_P0149_HY109_03.00781.00781.2 | 2 | 692.2604 | EYVLPSEFVR                   | YES | C3        |
| 1      | QS20070624_P0149_HY109_03.00788.00788.2 | 2 | 986.0389 | LSQTFPNADFAEITK              | no  | ALB       |
| 0.4326 | QS20070624_P0149_HY109_03.00789.00789.3 | 3 | 930.0032 | SMVLDVVFVLEGSDEVGEANFNK      | no  | VWF       |
| 0.9706 | QS20070624_P0149_HY109_03.00793.00793.2 | 2 | 545.6222 | LCAIPNLR                     | no  | ALB       |
| 1      | QS20070624_P0149_HY109_03.00797.00797.2 | 2 | 1133.193 | IFNSGADLSGITEENAPLK          | no  | SERPINA1E |
| 0.8697 | QS20070624_P0149_HY109_03.00798.00798.2 | 2 | 624.7137 | ILLMDLNK                     | YES | PON1      |
| 0.1032 | QS20070624_P0149_HY109_03.00800.00800.2 | 2 | 956.4397 | NSFCCTELNEENK                | no  | SETD2     |
| 0.1691 | QS20070624_P0149_HY109_03.00801.00801.2 | 2 | 695.6535 | SDTGSSGEAYK                  | no  | PARL      |
| 1      | QS20070624_P0149_HY109_03.00804.00804.2 | 2 | 831.9012 | AEMQQILQGLDK                 | YES | ASL       |
| 1      | QS20070624_P0149_HY109_03.00806.00806.2 | 2 | 876.9557 | VLGTSVESIMATEDR              | YES | CPS1      |
| 0.9753 | QS20070624_P0149_HY109_03.00808.00808.2 | 2 | 678.1751 | DFWDNLEK                     | no  | APOA1     |
| 1      | QS20070624_P0149_HY109_03.00809.00809.2 | 2 | 863.8484 | ENYGELADCCCK                 | no  | ALB       |
| 0.931  | QS20070624_P0149_HY109_03.00810.00810.2 | 2 | 752.3163 | ASLQNLLSASQAR                | YES | FAH       |
| 0.1436 | QS20070624_P0149_HY109_03.00814.00814.3 | 3 | 640.3653 | SHSGEFALDSILLK               | no  | LRRRC61   |
| 0.9823 | QS20070624_P0149_HY109_03.00818.00818.2 | 2 | 889.9519 | LFVDPSPQGLEVTGK              | no  | ITH4      |
| 1      | QS20070624_P0149_HY109_03.00821.00821.2 | 2 | 931.471  | GECQSEGVLFQGNR               | no  | HPXN      |
| 0.9983 | QS20070624_P0149_HY109_03.00828.00828.2 | 2 | 889.4607 | AQGDVFIKPOLWS                | YES | CRP       |
| 0.9985 | QS20070624_P0149_HY109_03.00829.00829.2 | 2 | 831.4058 | LEEDVLPENGIK                 | no  | SERPINA3K |
| 1      | QS20070624_P0149_HY109_03.00830.00830.2 | 2 | 851.4332 | TVQGAFFGVVPYK                | no  | PZP       |
| 1      | QS20070624_P0149_HY109_03.00832.00832.2 | 2 | 812.907  | LGEYGFQNAIVR                 | no  | ALB       |
| 0.9946 | QS20070624_P0149_HY109_03.00833.00833.2 | 2 | 629.7252 | LVVLPFPFK                    | no  | FETUB     |
| 1      | QS20070624_P0149_HY109_03.00840.00840.2 | 2 | 698.2674 | VWQLYIGDTR                   | YES | GNMT      |
| 0.6938 | QS20070624_P0149_HY109_03.00842.00842.2 | 2 | 945.5261 | FAPPQPAEPWSFVK               | no  | ES1       |
| 0.6323 | QS20070624_P0149_HY109_03.00844.00844.2 | 2 | 678.7292 | VDQALPQERR                   | no  | DIP2C     |
| 1      | QS20070624_P0149_HY109_03.00848.00848.2 | 2 | 895.4491 | AYLEEECEPEMLK                | YES | AZGP1     |
| 1      | QS20070624_P0149_HY109_03.00849.00849.2 | 2 | 1096.663 | SVLGNFYEYYVNDPPR             | YES | GCHFR     |
| 0.9302 | QS20070624_P0149_HY109_03.00852.00852.2 | 2 | 617.1541 | LEVDIDIK                     | YES | FGA       |
| 0.9866 | QS20070624_P0149_HY109_03.00853.00853.2 | 2 | 831.9012 | AEMQQILQGLDK                 | YES | ASL       |
| 0.7592 | QS20070624_P0149_HY109_03.00857.00857.3 | 3 | 1019.423 | GEPGKPGPPGLPGSGGGAISTATYTVPR | no  | C1QL1     |
| 0.7348 | QS20070624_P0149_HY109_03.00860.00860.2 | 2 | 625.1859 | ILLMDNKK                     | no  | LRRTM2    |
| 0.9941 | QS20070624_P0149_HY109_03.00868.00868.3 | 3 | 731.4444 | SVLGNFYEYYVNDPPR             | YES | GCHFR     |
| 1      | QS20070624_P0149_HY109_03.00881.00881.3 | 3 | 699.3895 | DIAFEVEDCDHIVQK              | YES | HPD       |
| 0.6974 | QS20070624_P0149_HY109_03.00882.00882.2 | 2 | 764.3104 | DFQLFSSPLGK                  | no  | TF        |
| 0.272  | QS20070624_P0149_HY109_03.00882.00882.3 | 3 | 764.8062 | IFNNGADLSGITEENAPLK          | no  | SPI1-6    |
| 0.9584 | QS20070624_P0149_HY109_03.00884.00884.2 | 2 | 889.4607 | AQGDVFIKPOLWS                | YES | CRP       |
| 0.9917 | QS20070624_P0149_HY109_03.00885.00885.2 | 2 | 666.7152 | DLELLASGVDR                  | YES | C3        |
| 1      | QS20070624_P0149_HY109_03.00886.00886.2 | 2 | 1146.706 | IFNNGADLSGITEENAPLK          | no  | SPI1-6    |
| 0.2873 | QS20070624_P0149_HY109_03.00888.00888.2 | 2 | 945.9888 | EYCGVPGDGYEELIR              | no  | AMBP      |
| 0.3588 | QS20070624_P0149_HY109_03.00890.00890.3 | 3 | 701.3898 | GYGGYGGCCRPSCYGR             | no  | #N/A      |

|        |                                         |   |          |                                     |     |           |
|--------|-----------------------------------------|---|----------|-------------------------------------|-----|-----------|
| 0.8037 | QS20070624_P0149_HY109_03.00892.00892.2 | 2 | 973.5057 | GTVDFSGAEYIDELR                     | no  | XPNPEP2   |
| 0.9802 | QS20070624_P0149_HY109_03.00893.00893.2 | 2 | 751.7866 | SINGTFFGGWK                         | YES | ADH4      |
| 0.9976 | QS20070624_P0149_HY109_03.00897.00897.2 | 2 | 824.9602 | LQALSPELLAPVPR                      | no  | LRG1      |
| 0.9744 | QS20070624_P0149_HY109_03.00913.00913.2 | 2 | 772.8024 | DGTIEIPSCFK                         | no  | APOH      |
| 0.9672 | QS20070624_P0149_HY109_03.00920.00920.2 | 2 | 617.1541 | LEVVDIDK                            | YES | FGA       |
| 0.9972 | QS20070624_P0149_HY109_03.00922.00922.2 | 2 | 837.3767 | DQYELLCLDNTR                        | no  | TF        |
| 1      | QS20070624_P0149_HY109_03.00926.00926.2 | 2 | 1096.663 | SVLGNNFYEYVNDPPR                    | YES | GCHFR     |
| 0.9875 | QS20070624_P0149_HY109_03.00929.00929.3 | 3 | 939.6555 | DDNPSLPPFERPEAEAMCTSFK              | no  | ALB       |
| 0.9868 | QS20070624_P0149_HY109_03.00933.00933.3 | 3 | 939.6555 | DDNPSLPPFERPEAEAMCTSFK              | no  | ALB       |
| 0.9963 | QS20070624_P0149_HY109_03.00938.00938.2 | 2 | 857.3874 | QEDFELLCPDGTR                       | no  | TF        |
| 0.8995 | QS20070624_P0149_HY109_03.00942.00942.3 | 3 | 729.8079 | YMLVPSQLYTETPEK                     | no  | MUG1      |
| 0.4177 | QS20070624_P0149_HY109_03.00944.00944.3 | 3 | 601.6553 | VTDVMLCAGEMGGGK                     | no  | EGFBP2    |
| 1      | QS20070624_P0149_HY109_03.00973.00973.2 | 2 | 1025.05  | LSSSDEEDFLYVDIK                     | no  | MUG1      |
| 0.9868 | QS20070624_P0149_HY109_03.00977.00977.2 | 2 | 747.3397 | DIPVNPCLYIR                         | no  | SERPINC1  |
| 0.9932 | QS20070624_P0149_HY109_03.00978.00978.2 | 2 | 685.7845 | NLQEILIGAVR                         | no  | EGFR      |
| 0.5102 | QS20070624_P0149_HY109_03.00981.00981.2 | 2 | 900.8438 | AFEEEEEEENK                         | no  | ZBTB38    |
| 0.9561 | QS20070624_P0149_HY109_03.00993.00993.2 | 2 | 710.3218 | LLVVYPWQR                           | no  | HBB-B1    |
| 0.2829 | QS20070624_P0149_HY109_03.01004.01004.2 | 2 | 633.1779 | VQLFSSAPK                           | no  | CEP164    |
| 1      | QS20070624_P0149_HY109_03.01005.01005.3 | 3 | 757.1474 | VPNAMSVDDEVLSVTACGK                 | no  | MUG1      |
| 0.9765 | QS20070624_P0149_HY109_03.01012.01012.3 | 3 | 731.4444 | SVLGNNFYEYVNDPPR                    | YES | GCHFR     |
| 1      | QS20070624_P0149_HY109_03.01014.01014.2 | 2 | 1096.663 | SVLGNNFYEYVNDPPR                    | YES | GCHFR     |
| 0.9588 | QS20070624_P0149_HY109_03.01020.01020.3 | 3 | 504.2128 | SIFSAVLDELK                         | YES | CPS1      |
| 0.2722 | QS20070624_P0149_HY109_03.01024.01024.2 | 2 | 794.8878 | TLVVLGEDETIVR                       | no  | SMCR8     |
| 0.9712 | QS20070624_P0149_HY109_03.01025.01025.2 | 2 | 824.8732 | QFEDFTVYVYGER                       | no  | CP        |
| 0.9994 | QS20070624_P0149_HY109_03.01028.01028.3 | 3 | 638.3342 | TDVTQQLSTLFQDK                      | no  | APOA4     |
| 0.9999 | QS20070624_P0149_HY109_03.01033.01033.3 | 3 | 757.1474 | VPNAMSVDDEVLSVTACGK                 | no  | MUG1      |
| 1      | QS20070624_P0149_HY109_03.01034.01034.3 | 3 | 687.3647 | FDEFSSQGCAPGYEK                     | no  | TF        |
| 0.9993 | QS20070624_P0149_HY109_03.01036.01036.3 | 3 | 638.3342 | TDVTQQLSTLFQDK                      | no  | APOA4     |
| 0.9996 | QS20070624_P0149_HY109_03.01037.01037.3 | 3 | 666.0605 | EIPAWIPLDPAANTK                     | no  | AZGP1     |
| 0.9991 | QS20070624_P0149_HY109_03.01052.01052.3 | 3 | 1084.494 | STCAQLENPSVETLPESTFEPVPIQAK         | no  | AGT       |
| 0.9991 | QS20070624_P0149_HY109_03.01056.01056.3 | 3 | 560.2889 | SLCTELQGTVAIPR                      | no  | MBL1      |
| 0.1262 | QS20070624_P0149_HY109_03.01062.01062.2 | 2 | 822.4287 | LEDSELLAQPFLLR                      | no  | LRG1      |
| 0.9122 | QS20070624_P0149_HY109_03.01078.01078.2 | 2 | 734.2827 | VPFDPDLTFK                          | no  | SERPINA3N |
| 0.993  | QS20070624_P0149_HY109_03.01084.01084.2 | 2 | 740.8331 | DIFTGLIGPMK                         | no  | CP        |
| 0.9985 | QS20070624_P0149_HY109_03.01094.01094.2 | 2 | 770.3527 | FVFGTTPEDILR                        | no  | THBS1     |
| 0.8042 | QS20070624_P0149_HY109_03.01096.01096.2 | 2 | 951.0381 | RDIECLQPLTHLK                       | no  | AW456874  |
| 0.9999 | QS20070624_P0149_HY109_03.01109.01109.3 | 3 | 634.7081 | AAPQLPMEELVLSLK                     | no  | AFM       |
| 0.9984 | QS20070624_P0149_HY109_03.01120.01120.2 | 2 | 726.2894 | TMEEILEGLK                          | no  | SERPINA3K |
| 0.9793 | QS20070624_P0149_HY109_03.01128.01128.3 | 3 | 706.7529 | AEGIPFYDYDVALVK                     | no  | CFB       |
| 0.9391 | QS20070624_P0149_HY109_03.01133.01133.2 | 2 | 576.141  | TLEDILFR                            | YES | FGG       |
| 1      | QS20070624_P0149_HY109_03.01136.01136.3 | 3 | 763.1722 | AVLDVAETGTEAAAATGVIGGIR             | no  | SERPINA3K |
| 1      | QS20070624_P0149_HY109_03.01138.01138.3 | 3 | 673.0522 | DLAPTNVDFAFNLYK                     | no  | SERPINA6  |
| 0.9967 | QS20070624_P0149_HY109_03.01154.01154.2 | 2 | 890.4607 | SPQELLCGASLISDR                     | no  | F2        |
| 0.807  | QS20070624_P0149_HY109_03.01165.01165.2 | 2 | 890.4607 | SPQELLCGASLISDR                     | no  | F2        |
| 0.2178 | QS20070624_P0149_HY109_03.01185.01185.3 | 3 | 1173.966 | MPGGPGAPSPAASSGSSRAAPSGIAACPLSPPLAR | no  | OTOP1     |
| 0.9999 | QS20070624_P0149_HY109_03.01188.01188.3 | 3 | 738.4822 | LENYPIPELGPNDVLLK                   | no  | SORD      |
| 0.1405 | QS20070624_P0149_HY109_03.01189.01189.2 | 2 | 657.6723 | DHVTANQLK                           | no  | NBEA      |
| 0.9998 | QS20070624_P0149_HY109_03.01194.01194.3 | 3 | 638.0005 | AEDTSEIDSEIAALR                     | no  | MBL2      |
| 1      | QS20070624_P0149_HY109_03.01200.01200.3 | 3 | 850.9095 | DQSPASHEIATNLGDFAIPLYR              | no  | SP11-6    |

|        |                                         |   |          |                          |     |               |
|--------|-----------------------------------------|---|----------|--------------------------|-----|---------------|
| 0.1922 | QS20070624_P0149_HY109_03.01206.01206.2 | 2 | 869.4091 | CLDGSTPMHAGASSGR         | no  | GM1082        |
| 0.5358 | QS20070624_P0149_HY109_03.01212.01212.3 | 3 | 784.8368 | HRPGALTTNGINPDTSTEIGR    | no  | 1810044A24RIK |
| 0.8332 | QS20070624_P0149_HY109_03.01224.01224.3 | 3 | 757.4621 | YFDSFGDLSASAIMGNAK       | no  | HBB-B1        |
| 0.9997 | QS20070624_P0149_HY109_03.01228.01228.3 | 3 | 869.6125 | LFQEEFPGIPYPPDAAVECHR    | no  | HPXN          |
| 0.9972 | QS20070624_P0149_HY109_03.01229.01229.3 | 3 | 619.3613 | TLNLAQNLLTQLPK           | no  | CPN2          |
| 1      | QS20070624_P0149_HY109_03.01232.01232.2 | 2 | 1135.69  | YFDSFGDLSASAIMGNAK       | no  | HBB-B1        |
| 0.6905 | QS20070624_P0149_HY109_03.01234.01234.3 | 3 | 869.6125 | LFQEEFPGIPYPPDAAVECHR    | no  | HPXN          |
| 0.3343 | QS20070624_P0149_HY109_03.01236.01236.2 | 2 | 1134.805 | FLGISLVTLWFQVAWAK        | no  | UNKNOWN       |
| 0.9935 | QS20070624_P0149_HY109_03.01248.01248.3 | 3 | 757.4621 | YFDSFGDLSASAIMGNAK       | no  | HBB-B1        |
| 0.9831 | QS20070624_P0149_HY109_03.01256.01256.2 | 2 | 716.7614 | LCENIAGHLK               | YES | CAT           |
| 0.5562 | QS20070624_P0149_HY109_03.01262.01262.3 | 3 | 806.2013 | GQVASCAPPLEILNGEINGAK    | no  | CFH           |
| 0.8451 | QS20070624_P0149_HY109_03.01268.01268.3 | 3 | 902.3559 | LLSYLDVEGNSINMVQMTFLK    | no  | COL11A1       |
| 0.9996 | QS20070624_P0149_HY109_03.01274.01274.3 | 3 | 720.7808 | ANVGFLPPFPTLDPEEK        | no  | AFM           |
| 0.9531 | QS20070624_P0149_HY109_03.01276.01276.3 | 3 | 902.3559 | LLSYLDVEGNSINMVQMTFLK    | no  | COL11A1       |
| 1      | QS20070624_P0149_HY109_03.01280.01280.3 | 3 | 720.7808 | ANVGFLPPFPTLDPEEK        | no  | AFM           |
| 0.9998 | QS20070624_P0149_HY109_03.01281.01281.3 | 3 | 693.0996 | APFALQVNTLPLNFDK         | no  | PZP           |
| 0.9997 | QS20070624_P0149_HY109_03.01312.01312.3 | 3 | 763.1722 | AVLDVAETGTEAAAAATGVIGGIR | no  | SERPINA3K     |
| 0.9998 | QS20070624_P0149_HY109_03.01321.01321.3 | 3 | 693.0996 | APFALQVNTLPLNFDK         | no  | PZP           |
| 1      | QS20070624_P0149_HY109_03.01336.01336.3 | 3 | 919.2894 | DLSPODQFNLIIFSGEANQWK    | no  | ITI14         |
| 1      | QS20070624_P0149_HY109_03.01337.01337.3 | 3 | 919.2894 | DLSPODQFNLIIFSGEANQWK    | no  | ITI14         |
| 1      | QS20070624_P0149_HY109_03.01340.01340.3 | 3 | 919.2894 | DLSPODQFNLIIFSGEANQWK    | no  | ITI14         |
| 0.3252 | QS20070624_P0149_HY109_03.01358.01358.3 | 3 | 838.2255 | ENPETEEDVGPVQHIYELR      | no  | ITGAV         |
| 0.9999 | QS20070624_P0149_HY109_03.01360.01360.3 | 3 | 726.4558 | LFDSDPITVVLPEEVSK        | no  | CLU           |
| 0.9981 | QS20070624_P0149_HY109_03.01361.01361.2 | 2 | 902.029  | VDEMTIPTVDVILGR          | YES | ADH4          |
| 1      | QS20070624_P0149_HY109_03.01372.01372.2 | 2 | 902.029  | VDEMTIPTVDVILGR          | YES | ADH4          |
| 1      | QS20070624_P0149_HY109_03.01374.01374.2 | 2 | 902.029  | VDEMTIPTVDVILGR          | YES | ADH4          |
| 0.9958 | QS20070624_P0149_HY109_03.01394.01394.3 | 3 | 763.1722 | AVLDVAETGTEAAAAATGVIGGIR | no  | SERPINA3K     |
| 0.9756 | QS20070624_P0149_HY109_03.01402.01402.3 | 3 | 763.1722 | AVLDVAETGTEAAAAATGVIGGIR | no  | SERPINA3K     |
| 0.9999 | QS20070624_P0149_HY109_03.01408.01408.3 | 3 | 833.8525 | ISFDPQDTFESEFYLDEK       | no  | SERPINA3K     |
| 0.2704 | QS20070624_P0149_HY109_03.01417.01417.2 | 2 | 730.7682 | AQFGGQVLHSK              | no  | C79407        |
| 0.972  | QS20070624_P0149_HY109_03.01425.01425.2 | 2 | 783.3514 | YVNWQQTIAAN              | no  | 2210010C04RIK |
| 0.9982 | QS20070624_P0149_HY109_03.01436.01436.2 | 2 | 902.029  | VDEMTIPTVDVILGR          | YES | ADH4          |
| 0.2749 | QS20070624_P0149_HY109_03.01453.01453.2 | 2 | 851.8556 | TSSSLDNCQSQR             | no  | UNKNOWN       |
| 0.9993 | QS20070624_P0149_HY109_03.01458.01458.3 | 3 | 763.1722 | AVLDVAETGTEAAAAATGVIGGIR | no  | SERPINA3K     |
| 0.28   | QS20070624_P0149_HY109_03.01460.01460.3 | 3 | 771.1504 | GDDDVFNPTNLLLEFLSDR      | no  | B3GNT7        |
| 1      | QS20070624_P0149_HY109_03.01464.01464.3 | 3 | 833.8525 | ISFDPQDTFESEFYLDEK       | no  | SERPINA3K     |
| 1      | QS20070624_P0149_HY109_03.01476.01476.3 | 3 | 833.8525 | ISFDPQDTFESEFYLDEK       | no  | SERPINA3K     |
| 0.9999 | QS20070624_P0149_HY109_03.01481.01481.3 | 3 | 833.8525 | ISFDPQDTFESEFYLDEK       | no  | SERPINA3K     |
| 0.9996 | QS20070624_P0149_HY109_03.01482.01482.3 | 3 | 716.4676 | TGLLSGLDIMEVNPTLTK       | no  | ARG1          |
| 0.9995 | QS20070624_P0149_HY109_03.01484.01484.3 | 3 | 716.4676 | TGLLSGLDIMEVNPTLTK       | no  | ARG1          |
| 1      | QS20070624_P0149_HY109_03.01496.01496.3 | 3 | 833.8525 | ISFDPQDTFESEFYLDEK       | no  | SERPINA3K     |
| 0.1482 | QS20070624_P0149_HY109_03.01504.01504.2 | 2 | 565.6467 | EMVEMLFS                 | no  | KPNA6         |
| 0.2479 | QS20070624_P0149_HY109_03.01505.01505.3 | 3 | 865.0389 | IATVMYTVVTPMMPFIYSLR     | no  | LOC639450     |
| 1      | QS20070624_P0149_HY109_03.01529.01529.3 | 3 | 772.1855 | APVVMGSSEDEVQEFLEIYR     | no  | FBP1          |
| 0.2054 | QS20070624_P0149_HY109_03.01532.01532.2 | 2 | 816.409  | DFIFTVMEDLR              | no  | 4732429D16RIK |
| 0.9998 | QS20070624_P0149_HY109_03.01538.01538.3 | 3 | 822.1851 | LSEDEDCILYSSWLAEK        | no  | MUG1          |
| 1      | QS20070624_P0149_HY109_03.01540.01540.3 | 3 | 822.1851 | LSEDEDCILYSSWLAEK        | no  | MUG1          |
| 1      | QS20070624_P0149_HY109_03.01545.01545.3 | 3 | 798.5211 | ISEDCLYLNISPADLTK        | no  | ES1           |
| 0.9842 | QS20070624_P0149_HY109_03.01570.01570.3 | 3 | 655.6969 | DLADELALVDVMEDEK         | no  | LDHA          |



|        |                                         |   |          |                            |    |               |
|--------|-----------------------------------------|---|----------|----------------------------|----|---------------|
| 1      | QS20070624_P0149_HY109_03.01573.01573.3 | 3 | 718.1117 | EQLQDMGLIDLFSPEK           | no | SERPINC1      |
| 0.5553 | QS20070624_P0149_HY109_03.01596.01596.2 | 2 | 565.6467 | EMVEMLFS                   | no | KPNA6         |
| 0.997  | QS20070624_P0149_HY109_03.01597.01597.3 | 3 | 892.2436 | EVVSLTEEECAEGADPTCYDTR     | no | GC            |
| 0.9999 | QS20070624_P0149_HY109_03.01601.01601.3 | 3 | 892.2436 | EVVSLTEEECAEGADPTCYDTR     | no | GC            |
| 1      | QS20070624_P0149_HY109_03.01605.01605.3 | 3 | 833.5254 | GGDSGFVADLSFLDLDPAGNK      | no | C7            |
| 1      | QS20070624_P0149_HY109_03.01608.01608.3 | 3 | 833.5254 | GGDSGFVADLSFLDLDPAGNK      | no | C7            |
| 0.996  | QS20070624_P0149_HY109_03.01622.01622.3 | 3 | 763.1722 | AVLDVAETGTEAAAAATGVIGGIR   | no | SERPINA3K     |
| 0.9988 | QS20070624_P0149_HY109_03.01637.01637.3 | 3 | 833.5254 | GGDSGFVADLSFLDLDPAGNK      | no | C7            |
| 0.9164 | QS20070624_P0149_HY109_03.01660.01660.3 | 3 | 833.5254 | GGDSGFVADLSFLDLDPAGNK      | no | C7            |
| 1      | QS20070624_P0149_HY109_03.01668.01668.3 | 3 | 758.1732 | IIIQGSPPVQMAEDAVIDGER      | no | C3            |
| 0.9976 | QS20070624_P0149_HY109_03.01672.01672.3 | 3 | 727.1304 | DIQQWEYVPLGPFGLK           | no | FAH           |
| 0.5022 | QS20070624_P0149_HY109_03.01674.01674.3 | 3 | 742.1432 | LNAGEVVIGDGGVFVALEK        | no | BHMT          |
| 0.9993 | QS20070624_P0149_HY109_03.01705.01705.3 | 3 | 648.4008 | IGVAIGDQILDLSVIK           | no | FAH           |
| 0.9999 | QS20070624_P0149_HY109_03.01709.01709.3 | 3 | 760.1569 | TDFANWASSLANAPALISQR       | no | C9            |
| 0.2443 | QS20070624_P0149_HY109_03.01710.01710.3 | 3 | 826.247  | WNQQQLDDLYLIAICHR          | no | DCPS          |
| 0.2342 | QS20070624_P0149_HY109_03.01712.01712.2 | 2 | 783.3514 | YVNWIIQQTIAAN              | no | 2210010C04RIK |
| 0.9989 | QS20070624_P0149_HY109_03.01713.01713.3 | 3 | 801.9083 | ALQEGNFQTPFVIVPLTDLR       | no | AOB           |
| 0.1489 | QS20070624_P0149_HY109_03.01730.01730.2 | 2 | 689.2726 | FLPQLPMDK                  | no | LOC381255     |
| 0.992  | QS20070624_P0149_HY109_03.01732.01732.2 | 2 | 587.6569 | LLDVAELGSL                 | no | LRG1          |
| 0.5857 | QS20070624_P0149_HY109_03.01772.01772.3 | 3 | 763.1722 | AVLDVAETGTEAAAAATGVIGGIR   | no | SERPINA3K     |
| 1      | QS20070624_P0149_HY109_03.01776.01776.3 | 3 | 775.5463 | LSISGNYNLETMSPLGITR        | no | SERPINA1E     |
| 1      | QS20070624_P0149_HY109_03.01782.01782.3 | 3 | 861.5891 | ELGSPPGISLETIDAAFSCPGSSR   | no | HPXN          |
| 0.9998 | QS20070624_P0149_HY109_03.01784.01784.3 | 3 | 810.2006 | TANDAIQDMLCDMEGLPQK        | no | AFM           |
| 1      | QS20070624_P0149_HY109_03.01788.01788.3 | 3 | 861.5891 | ELGSPPGISLETIDAAFSCPGSSR   | no | HPXN          |
| 1      | QS20070624_P0149_HY109_03.01789.01789.2 | 2 | 1291.88  | ELGSPPGISLETIDAAFSCPGSSR   | no | HPXN          |
| 0.2546 | QS20070624_P0149_HY109_03.01790.01790.2 | 2 | 708.7618 | LFHGGLAGDK                 | no | RABEPK        |
| 1      | QS20070624_P0149_HY109_03.01800.01800.3 | 3 | 861.5891 | ELGSPPGISLETIDAAFSCPGSSR   | no | HPXN          |
| 1      | QS20070624_P0149_HY109_03.01810.01810.3 | 3 | 810.2006 | TANDAIQDMLCDMEGLPQK        | no | AFM           |
| 1      | QS20070624_P0149_HY109_03.01830.01830.3 | 3 | 778.8431 | IVNDDFSQVADVLVEDGVVR       | no | DPYS          |
| 1      | QS20070624_P0149_HY109_03.01833.01833.3 | 3 | 778.8431 | IVNDDFSQVADVLVEDGVVR       | no | DPYS          |
| 0.2137 | QS20070624_P0149_HY109_03.01837.01837.3 | 3 | 676.0658 | DGFPAATAANCLATGVR          | no | EYA1          |
| 0.9992 | QS20070624_P0149_HY109_03.01840.01840.3 | 3 | 763.1722 | AVLDVAETGTEAAAAATGVIGGIR   | no | SERPINA3K     |
| 0.1907 | QS20070624_P0149_HY109_03.01841.01841.3 | 3 | 627.6944 | AEQQVQVQIPQALR             | no | SP2           |
| 1      | QS20070624_P0149_HY109_03.01849.01849.3 | 3 | 861.5891 | ELGSPPGISLETIDAAFSCPGSSR   | no | HPXN          |
| 0.9984 | QS20070624_P0149_HY109_03.01852.01852.3 | 3 | 763.1722 | AVLDVAETGTEAAAAATGVIGGIR   | no | SERPINA3K     |
| 0.9997 | QS20070624_P0149_HY109_03.01856.01856.3 | 3 | 861.5891 | ELGSPPGISLETIDAAFSCPGSSR   | no | HPXN          |
| 0.9994 | QS20070624_P0149_HY109_03.01857.01857.3 | 3 | 763.1722 | AVLDVAETGTEAAAAATGVIGGIR   | no | SERPINA3K     |
| 0.3117 | QS20070624_P0149_HY109_03.01860.01860.3 | 3 | 815.9256 | EFQLDPTQELIFPELMR          | no | AOX3          |
| 0.9576 | QS20070624_P0149_HY109_03.01861.01861.3 | 3 | 778.8431 | IVNDDFSQVADVLVEDGVVR       | no | DPYS          |
| 0.9939 | QS20070624_P0149_HY109_03.01873.01873.3 | 3 | 845.9359 | VYIYGNDLGLPPIDLDDK         | no | GPLD1         |
| 0.5771 | QS20070624_P0149_HY109_03.01885.01885.2 | 2 | 820.4375 | RSHFVLIAGEPLR              | no | PIR           |
| 0.9985 | QS20070624_P0149_HY109_03.01898.01898.3 | 3 | 763.1722 | AVLDVAETGTEAAAAATGVIGGIR   | no | SERPINA3K     |
| 0.2156 | QS20070624_P0149_HY109_03.01901.01901.3 | 3 | 818.9088 | SSGVALSIAVGLLECTFPNTGAR    | no | SEC23A        |
| 0.966  | QS20070624_P0149_HY109_03.01910.01910.3 | 3 | 700.1447 | FALEIPVEFSMVPMAK           | no | MUG1          |
| 0.9998 | QS20070624_P0149_HY109_03.01914.01914.3 | 3 | 763.1722 | AVLDVAETGTEAAAAATGVIGGIR   | no | SERPINA3K     |
| 0.3161 | QS20070624_P0149_HY109_03.01917.01917.2 | 2 | 565.6467 | EMVEMLFS                   | no | KPNA6         |
| 0.6875 | QS20070624_P0149_HY109_03.01924.01924.3 | 3 | 669.7458 | QGFIDLPEFPFGLLEPR          | no | BHMT          |
| 0.9977 | QS20070624_P0149_HY109_03.01933.01933.3 | 3 | 763.1722 | AVLDVAETGTEAAAAATGVIGGIR   | no | SERPINA3K     |
| 1      | QS20070624_P0149_HY109_03.01945.01945.3 | 3 | 969.7254 | DGGIPADPNINFLSTGASDAIVTMLK | no | GPT1          |

|        |                                         |   |          |                              |    |               |
|--------|-----------------------------------------|---|----------|------------------------------|----|---------------|
| 0.9998 | QS20070624_P0149_HY109_03.01948.01948.3 | 3 | 969.7254 | DGGIPADPNNIFLSTGASDAIVTMLK   | no | GPT1          |
| 0.993  | QS20070624_P0149_HY109_03.01964.01964.3 | 3 | 763.1722 | AVLDVAETGTEAAAAATGVIGGIR     | no | SERPINA3K     |
| 0.9985 | QS20070624_P0149_HY109_03.01980.01980.3 | 3 | 763.1722 | AVLDVAETGTEAAAAATGVIGGIR     | no | SERPINA3K     |
| 0.9996 | QS20070624_P0149_HY109_03.01985.01985.3 | 3 | 763.1722 | AVLDVAETGTEAAAAATGVIGGIR     | no | SERPINA3K     |
| 0.9927 | QS20070624_P0149_HY109_03.01994.01994.3 | 3 | 583.3278 | DIASGLIGLILCK                | no | CP            |
| 0.9999 | QS20070624_P0149_HY109_03.02002.02002.3 | 3 | 919.0024 | QVLALCVYPNLLSSPDFPEDAK       | no | GPT1          |
| 0.9996 | QS20070624_P0149_HY109_03.02004.02004.3 | 3 | 909.9813 | LNEDMACSVAGITSDANVLTNELR     | no | PSMA4         |
| 0.9759 | QS20070624_P0149_HY109_03.02034.02034.2 | 2 | 684.2363 | SIIGYVEELEA                  | no | LIFR          |
| 0.9322 | QS20070624_P0149_HY109_03.02050.02050.3 | 3 | 763.1722 | AVLDVAETGTEAAAAATGVIGGIR     | no | SERPINA3K     |
| 0.9998 | QS20070624_P0149_HY109_03.02062.02062.3 | 3 | 763.1722 | AVLDVAETGTEAAAAATGVIGGIR     | no | SERPINA3K     |
| 0.9969 | QS20070624_P0149_HY109_03.02066.02066.3 | 3 | 763.1722 | AVLDVAETGTEAAAAATGVIGGIR     | no | SERPINA3K     |
| 0.1855 | QS20070624_P0149_HY109_03.02092.02092.2 | 2 | 939.5781 | VGLLEALLPGQPEAVAR            | no | GSS           |
| 1      | QS20070624_P0149_HY109_03.02093.02093.3 | 3 | 835.5554 | SDDLQCVFITLLPNENCAK          | no | KLK1B26       |
| 1      | QS20070624_P0149_HY109_03.02104.02104.3 | 3 | 835.5554 | SDDLQCVFITLLPNENCAK          | no | KLK1B26       |
| 0.9297 | QS20070624_P0149_HY109_03.02128.02128.3 | 3 | 763.1722 | AVLDVAETGTEAAAAATGVIGGIR     | no | SERPINA3K     |
| 0.9997 | QS20070624_P0149_HY109_03.02158.02158.3 | 3 | 763.1722 | AVLDVAETGTEAAAAATGVIGGIR     | no | SERPINA3K     |
| 0.2043 | QS20070624_P0149_HY109_03.02165.02165.2 | 2 | 1266.438 | TAALLTTMMSVTGVSGVLDTR        | no | BC021785      |
| 1      | QS20070624_P0149_HY109_03.02181.02181.3 | 3 | 979.4154 | ATGGGLQPLPGGIPGTEALGGLLNLGDK | no | 5430413K10RIK |
| 0.9992 | QS20070624_P0149_HY109_03.02196.02196.3 | 3 | 763.1722 | AVLDVAETGTEAAAAATGVIGGIR     | no | SERPINA3K     |
| 0.9997 | QS20070624_P0149_HY109_03.02224.02224.3 | 3 | 763.1722 | AVLDVAETGTEAAAAATGVIGGIR     | no | SERPINA3K     |
| 0.9973 | QS20070624_P0149_HY109_03.02240.02240.3 | 3 | 763.1722 | AVLDVAETGTEAAAAATGVIGGIR     | no | SERPINA3K     |
| 1      | QS20070624_P0149_HY109_03.02253.02253.3 | 3 | 867.3237 | EPGQDLVVLSLPTPEFIPSFR        | no | C3            |
| 1      | QS20070624_P0149_HY109_03.02256.02256.3 | 3 | 867.3237 | EPGQDLVVLSLPTPEFIPSFR        | no | C3            |
| 1      | QS20070624_P0149_HY109_03.02261.02261.3 | 3 | 867.3237 | EPGQDLVVLSLPTPEFIPSFR        | no | C3            |
| 1      | QS20070624_P0149_HY109_03.02269.02269.3 | 3 | 867.3237 | EPGQDLVVLSLPTPEFIPSFR        | no | C3            |
| 0.6023 | QS20070624_P0149_HY109_03.02272.02272.2 | 2 | 755.3299 | KSVEFLLLK                    | no | EG245391      |
| 0.9999 | QS20070624_P0149_HY109_03.02273.02273.3 | 3 | 763.1722 | AVLDVAETGTEAAAAATGVIGGIR     | no | SERPINA3K     |
| 0.2766 | QS20070624_P0149_HY109_03.02274.02274.3 | 3 | 772.1562 | QCEELGAFTESMVVYVYCPN         | no | C3            |
| 0.2752 | QS20070624_P0149_HY109_03.02276.02276.2 | 2 | 755.3299 | KSVEFLLLK                    | no | EG245391      |
| 0.9999 | QS20070624_P0149_HY109_03.02317.02317.3 | 3 | 974.4349 | LTAQPAPSPEDLTLSMSTIMWLTK     | no | MUG1          |
| 0.9996 | QS20070624_P0149_HY109_03.02336.02336.3 | 3 | 763.1722 | AVLDVAETGTEAAAAATGVIGGIR     | no | SERPINA3K     |
| 0.9999 | QS20070624_P0149_HY109_03.02344.02344.3 | 3 | 763.1722 | AVLDVAETGTEAAAAATGVIGGIR     | no | SERPINA3K     |
| 0.9985 | QS20070624_P0149_HY109_03.02368.02368.3 | 3 | 763.1722 | AVLDVAETGTEAAAAATGVIGGIR     | no | SERPINA3K     |
| 0.3719 | QS20070624_P0149_HY109_03.02376.02376.2 | 2 | 667.7217 | AISSVETLIEGA                 | no | CAPN9         |
| 1      | QS20070624_P0149_HY109_03.02404.02404.3 | 3 | 763.1722 | AVLDVAETGTEAAAAATGVIGGIR     | no | SERPINA3K     |
| 0.9993 | QS20070624_P0149_HY109_03.02413.02413.3 | 3 | 763.1722 | AVLDVAETGTEAAAAATGVIGGIR     | no | SERPINA3K     |
| 0.9998 | QS20070624_P0149_HY109_03.02422.02422.3 | 3 | 763.1722 | AVLDVAETGTEAAAAATGVIGGIR     | no | SERPINA3K     |
| 0.9994 | QS20070624_P0149_HY109_03.02437.02437.3 | 3 | 770.1646 | IPESGGDNGVDFIFELIGGAR        | no | THBS1         |
| 1      | QS20070624_P0149_HY109_03.02454.02454.3 | 3 | 695.1457 | LPIICFDYGMVPISAPR            | no | MUG1          |
| 1      | QS20070624_P0149_HY109_03.02474.02474.3 | 3 | 763.1722 | AVLDVAETGTEAAAAATGVIGGIR     | no | SERPINA3K     |
| 0.9995 | QS20070624_P0149_HY109_03.02488.02488.3 | 3 | 763.1722 | AVLDVAETGTEAAAAATGVIGGIR     | no | SERPINA3K     |
| 0.9971 | QS20070624_P0149_HY109_03.02564.02564.3 | 3 | 763.1722 | AVLDVAETGTEAAAAATGVIGGIR     | no | SERPINA3K     |
| 0.4956 | QS20070624_P0149_HY109_03.02624.02624.3 | 3 | 763.1722 | AVLDVAETGTEAAAAATGVIGGIR     | no | SERPINA3K     |
| 0.9999 | QS20070624_P0149_HY109_03.02633.02633.3 | 3 | 763.1722 | AVLDVAETGTEAAAAATGVIGGIR     | no | SERPINA3K     |
| 0.9956 | QS20070624_P0149_HY109_03.02676.02676.3 | 3 | 763.1722 | AVLDVAETGTEAAAAATGVIGGIR     | no | SERPINA3K     |
| 0.9958 | QS20070624_P0149_HY109_03.02692.02692.3 | 3 | 763.1722 | AVLDVAETGTEAAAAATGVIGGIR     | no | SERPINA3K     |
| 0.9995 | QS20070624_P0149_HY109_03.02716.02716.3 | 3 | 763.1722 | AVLDVAETGTEAAAAATGVIGGIR     | no | SERPINA3K     |
| 0.1386 | QS20070624_P0149_HY109_03.02749.02749.3 | 3 | 911.6707 | RDVDNGLSLVIFSDWYNTSVMR       | no | MBTPS1        |
| 0.9999 | QS20070624_P0149_HY109_03.02761.02761.3 | 3 | 763.1722 | AVLDVAETGTEAAAAATGVIGGIR     | no | SERPINA3K     |

|        |                                         |   |          |                                |     |               |
|--------|-----------------------------------------|---|----------|--------------------------------|-----|---------------|
| 0.341  | QS20070624_P0149_HY109_03.02844.02844.3 | 3 | 1178.411 | FLVLLALAGLLAFLSLSLQFFHLIPVSATK | no  | ACPL2         |
| 0.9999 | QS20070624_P0149_HY109_03.02904.02904.3 | 3 | 763.1722 | AVLDVAETGTEAAAAATGVIGGIR       | no  | SERPINA3K     |
| 0.9999 | QS20070624_P0149_HY109_03.03045.03045.3 | 3 | 763.1722 | AVLDVAETGTEAAAAATGVIGGIR       | no  | SERPINA3K     |
| 0.9989 | QS20070624_P0149_HY109_03.03225.03225.3 | 3 | 941.7088 | AQNVPLPVSTLVEFVIAATDCTAK       | no  | AHSG          |
| 0.1807 | QS20070624_P0149_HY109_03.03261.03261.2 | 2 | 732.8105 | TLDNDIMLIK                     | no  | TRY10L        |
| 0.9989 | QS20070624_P0149_HY109_03.03292.03292.3 | 3 | 763.1722 | AVLDVAETGTEAAAAATGVIGGIR       | no  | SERPINA3K     |
| 0.9997 | QS20070624_P0149_HY109_03.03349.03349.3 | 3 | 763.1722 | AVLDVAETGTEAAAAATGVIGGIR       | no  | SERPINA3K     |
| 0.9944 | QS20070624_P0149_HY109_04.01288.01288.3 | 3 | 362.0428 | VVDPTHK                        | no  | SERPINA1A     |
| 1      | QS20070624_P0149_HY109_04.01295.01295.3 | 3 | 611.9637 | VSTVTTHSSDSEVPSR               | no  | CLU           |
| 0.9986 | QS20070624_P0149_HY109_04.01304.01304.2 | 2 | 702.1962 | AEPANLEK                       | YES | AQP9          |
| 1      | QS20070624_P0149_HY109_04.01315.01315.2 | 2 | 612.1363 | GTVSVTVSGK                     | YES | PLG           |
| 0.2679 | QS20070624_P0149_HY109_04.01317.01317.2 | 2 | 562.056  | VGASTQSGK                      | no  | PITX2         |
| 1      | QS20070624_P0149_HY109_04.01323.01323.3 | 3 | 512.5215 | LNQISYEDHK                     | YES | CFB           |
| 1      | QS20070624_P0149_HY109_04.01327.01327.3 | 3 | 512.5215 | LNQISYEDHK                     | YES | CFB           |
| 0.9999 | QS20070624_P0149_HY109_04.01333.01333.3 | 3 | 579.5822 | LGDASTYADGVHNK                 | no  | APOA4         |
| 1      | QS20070624_P0149_HY109_04.01337.01337.3 | 3 | 593.9373 | QAEFHVDESTTVK                  | no  | SERPINA1E     |
| 1      | QS20070624_P0149_HY109_04.01341.01341.2 | 2 | 890.4024 | QAEFHVDESTTVK                  | no  | SERPINA1E     |
| 0.9916 | QS20070624_P0149_HY109_04.01351.01351.2 | 2 | 698.2063 | AGEYEALPEK                     | YES | FTCD          |
| 1      | QS20070624_P0149_HY109_04.01352.01352.2 | 2 | 837.8722 | IGGHGAEYGAEALER                | no  | HBA-A1        |
| 0.9911 | QS20070624_P0149_HY109_04.01355.01355.2 | 2 | 931.4537 | KDPSSNDPLTETIR                 | no  | MUG1          |
| 0.9999 | QS20070624_P0149_HY109_04.01356.01356.3 | 3 | 444.4606 | DTANLFPHK                      | YES | CP            |
| 0.8686 | QS20070624_P0149_HY109_04.01357.01357.3 | 3 | 429.1324 | LSVSQVVHK                      | no  | SERPINA3K     |
| 0.9969 | QS20070624_P0149_HY109_04.01363.01363.2 | 2 | 881.8886 | EINLDQYEGHQK                   | YES | FGA           |
| 0.9962 | QS20070624_P0149_HY109_04.01364.01364.3 | 3 | 508.865  | KVINDFVEK                      | no  | SPI1-6        |
| 0.8498 | QS20070624_P0149_HY109_04.01384.01384.2 | 2 | 801.8657 | HTTIFEVLPEK                    | YES | TF            |
| 0.9967 | QS20070624_P0149_HY109_04.01385.01385.2 | 2 | 854.3255 | TCVADESAANCDK                  | no  | ALB           |
| 0.9621 | QS20070624_P0149_HY109_04.01388.01388.2 | 2 | 660.6509 | TNCDLYEK                       | no  | ALB           |
| 1      | QS20070624_P0149_HY109_04.01391.01391.2 | 2 | 917.4021 | ESDTSYVLEAESK                  | YES | CRP           |
| 1      | QS20070624_P0149_HY109_04.01396.01396.3 | 3 | 822.4909 | KFPDPENTEEAEFHVDK              | no  | SERPINA1B     |
| 0.995  | QS20070624_P0149_HY109_04.01405.01405.3 | 3 | 422.1225 | LFAYPDTHR                      | YES | CAT           |
| 0.89   | QS20070624_P0149_HY109_04.01411.01411.3 | 3 | 708.7719 | SPEGPVSRVATLPSRPK              | no  | USP36         |
| 0.9992 | QS20070624_P0149_HY109_04.01412.01412.3 | 3 | 597.9409 | TCGDIPELEHGS AK                | no  | CFH           |
| 0.8567 | QS20070624_P0149_HY109_04.01413.01413.2 | 2 | 855.3858 | YMCENQATISSK                   | no  | ALB           |
| 0.9997 | QS20070624_P0149_HY109_04.01415.01415.3 | 3 | 465.851  | LTEVPALVHK                     | no  | PZP           |
| 1      | QS20070624_P0149_HY109_04.01416.01416.3 | 3 | 654.7044 | AGPWTEAAVEHPEAVR               | no  | BHMT          |
| 1      | QS20070624_P0149_HY109_04.01419.01419.2 | 2 | 691.7378 | TASQLIDMSK                     | YES | FTCD          |
| 0.1611 | QS20070624_P0149_HY109_04.01421.01421.2 | 2 | 698.2728 | LTEVPALVHK                     | no  | PZP           |
| 0.1533 | QS20070624_P0149_HY109_04.01423.01423.2 | 2 | 952.9689 | KAWSSQDEVSSHVR                 | no  | PLEKHG3       |
| 0.7437 | QS20070624_P0149_HY109_04.01427.01427.2 | 2 | 487.5191 | LSFSYGR                        | YES | ALDOB         |
| 0.4438 | QS20070624_P0149_HY109_04.01432.01432.2 | 2 | 608.6352 | SASGASEPPLR                    | no  | 1110038F14RIK |
| 0.9942 | QS20070624_P0149_HY109_04.01439.01439.2 | 2 | 487.0546 | HELSVIM                        | YES | AQP9          |
| 0.9921 | QS20070624_P0149_HY109_04.01441.01441.2 | 2 | 596.6456 | LSPVAEEFR                      | YES | APOA1         |
| 0.9905 | QS20070624_P0149_HY109_04.01444.01444.2 | 2 | 631.1824 | QTALAEVVK                      | no  | ALB           |
| 0.5781 | QS20070624_P0149_HY109_04.01451.01451.3 | 3 | 612.0011 | ILGPSKPVCAEIK                  | no  | 2810046L04RIK |
| 1      | QS20070624_P0149_HY109_04.01452.01452.3 | 3 | 701.7221 | SGAQATWTEVSWPHEK               | no  | HPXN          |
| 1      | QS20070624_P0149_HY109_04.01455.01455.2 | 2 | 1130.663 | AADKDTCFSTEGPNLVTR             | no  | ALB           |
| 1      | QS20070624_P0149_HY109_04.01457.01457.2 | 2 | 789.8109 | ACEPGVDVYVK                    | YES | C3            |
| 0.9828 | QS20070624_P0149_HY109_04.01459.01459.2 | 2 | 723.2582 | IQNILSEDPK                     | YES | PON1          |
| 0.9889 | QS20070624_P0149_HY109_04.01481.01481.2 | 2 | 623.1761 | ALELEQELR                      | YES | GPT1          |

|        |                                         |   |          |                       |     |               |
|--------|-----------------------------------------|---|----------|-----------------------|-----|---------------|
| 1      | QS20070624_P0149_HY109_04.01483.01483.2 | 2 | 995.6093 | AHMVTLDYTVQVPGTGR     | YES | GNMT          |
| 0.9985 | QS20070624_P0149_HY109_04.01488.01488.2 | 2 | 777.8016 | VAEEWAQGTFK           | YES | ASL           |
| 0.4443 | QS20070624_P0149_HY109_04.01489.01489.2 | 2 | 698.288  | ATPEMVSMK             | YES | GCDH          |
| 1      | QS20070624_P0149_HY109_04.01492.01492.3 | 3 | 703.0855 | ANLMHNLGGEEVSVACK     | no  | AHSG          |
| 0.2715 | QS20070624_P0149_HY109_04.01509.01509.3 | 3 | 639.6706 | NYISNSAQSNGLMK        | no  | NRXN3         |
| 0.3338 | QS20070624_P0149_HY109_04.01512.01512.2 | 2 | 580.1755 | GAPPLPIPR             | no  | WIPF1         |
| 1      | QS20070624_P0149_HY109_04.01517.01517.3 | 3 | 796.8357 | QQLGPNSEVESHLSFLEK    | no  | APOA4         |
| 0.9994 | QS20070624_P0149_HY109_04.01521.01521.3 | 3 | 581.5978 | GTFASELHCCK           | no  | HBB-B1        |
| 1      | QS20070624_P0149_HY109_04.01547.01547.3 | 3 | 544.5789 | DLQILAEFHEK           | no  | SERPINA3K     |
| 0.9811 | QS20070624_P0149_HY109_04.01548.01548.2 | 2 | 573.162  | IQFVPLAR              | YES | GCDH          |
| 0.9649 | QS20070624_P0149_HY109_04.01549.01549.2 | 2 | 652.72   | SLSCQMAAFR            | YES | ASGR1         |
| 0.9875 | QS20070624_P0149_HY109_04.01552.01552.2 | 2 | 652.72   | SLSCQMAAFR            | YES | ASGR1         |
| 0.9985 | QS20070624_P0149_HY109_04.01555.01555.2 | 2 | 655.6968 | ELAFLEATK             | YES | PCYT2         |
| 0.9983 | QS20070624_P0149_HY109_04.01563.01563.2 | 2 | 719.7622 | LVQEVDFAK             | no  | ALB           |
| 0.9947 | QS20070624_P0149_HY109_04.01565.01565.2 | 2 | 777.8181 | GFSQSLVQWDR           | YES | AZGP1         |
| 0.8998 | QS20070624_P0149_HY109_04.01588.01588.2 | 2 | 732.8105 | TLDNDIMLIK            | no  | TRY10L        |
| 0.9975 | QS20070624_P0149_HY109_04.01591.01591.2 | 2 | 674.7812 | PYLLISTQIR            | no  | GCHFR         |
| 0.9985 | QS20070624_P0149_HY109_04.01597.01597.3 | 3 | 621.2863 | ECCHGDLECADDR         | no  | ALB           |
| 0.9273 | QS20070624_P0149_HY109_04.01600.01600.2 | 2 | 692.2604 | EYVLPSEVR             | YES | C3            |
| 0.5455 | QS20070624_P0149_HY109_04.01611.01611.2 | 2 | 749.1865 | AEDEGSTEEGK           | no  | TCEAL5        |
| 0.9735 | QS20070624_P0149_HY109_04.01612.01612.2 | 2 | 545.6222 | LCAIPNLR              | no  | ALB           |
| 1      | QS20070624_P0149_HY109_04.01616.01616.3 | 3 | 591.6321 | CSPDPGLTALLSDHR       | no  | HPXN          |
| 0.9803 | QS20070624_P0149_HY109_04.01619.01619.2 | 2 | 636.6681 | WEYCDIPR              | YES | PLG           |
| 0.8558 | QS20070624_P0149_HY109_04.01620.01620.2 | 2 | 624.7137 | ILLMDLNK              | YES | PON1          |
| 1      | QS20070624_P0149_HY109_04.01623.01623.2 | 2 | 751.7866 | SINGTFFGGWK           | YES | ADH4          |
| 1      | QS20070624_P0149_HY109_04.01625.01625.3 | 3 | 780.4744 | FPSLHGDCVALPNGDDGECR  | no  | KNG1          |
| 0.9218 | QS20070624_P0149_HY109_04.01627.01627.2 | 2 | 617.1541 | LEVVIDIK              | YES | FGA           |
| 0.9882 | QS20070624_P0149_HY109_04.01628.01628.2 | 2 | 863.8484 | ENYGELADCCTK          | no  | ALB           |
| 1      | QS20070624_P0149_HY109_04.01635.01635.2 | 2 | 831.9012 | AEMQQQLQGLDK          | YES | ASL           |
| 0.9873 | QS20070624_P0149_HY109_04.01639.01639.3 | 3 | 725.4274 | AETFTFHSDICTLPEK      | no  | ALB           |
| 0.3514 | QS20070624_P0149_HY109_04.01641.01641.2 | 2 | 730.2791 | ILSDMFSTEK            | no  | ES1           |
| 0.5323 | QS20070624_P0149_HY109_04.01647.01647.2 | 2 | 674.7812 | PYLLISTQIR            | no  | GCHFR         |
| 0.1013 | QS20070624_P0149_HY109_04.01648.01648.2 | 2 | 638.1959 | LSAVVQELK             | no  | BICD1         |
| 0.9975 | QS20070624_P0149_HY109_04.01651.01651.2 | 2 | 889.4607 | AQGDVFIKPLWS          | YES | CRP           |
| 0.9989 | QS20070624_P0149_HY109_04.01652.01652.2 | 2 | 698.2674 | VWQLYIGDTR            | YES | GNMT          |
| 0.9942 | QS20070624_P0149_HY109_04.01653.01653.2 | 2 | 666.187  | AWFSEAFGK             | no  | APOC1         |
| 0.3302 | QS20070624_P0149_HY109_04.01655.01655.2 | 2 | 655.7197 | FLQPEFIK              | no  | UNKNOWN       |
| 0.9925 | QS20070624_P0149_HY109_04.01657.01657.2 | 2 | 578.1581 | YVIEFIAR              | no  | KNG1          |
| 1      | QS20070624_P0149_HY109_04.01663.01663.2 | 2 | 812.907  | LGEYGFQNAILVR         | no  | ALB           |
| 0.9157 | QS20070624_P0149_HY109_04.01665.01665.2 | 2 | 629.7252 | LVVLPFPGK             | no  | FETUB         |
| 1      | QS20070624_P0149_HY109_04.01672.01672.2 | 2 | 706.7737 | VCNELAMLGK            | no  | GC            |
| 0.9989 | QS20070624_P0149_HY109_04.01677.01677.2 | 2 | 729.7572 | ALSCLESSWK            | no  | MUG1          |
| 1      | QS20070624_P0149_HY109_04.01685.01685.3 | 3 | 682.7329 | VITAFNDGLNHLDSLK      | no  | HBB-B1        |
| 0.9988 | QS20070624_P0149_HY109_04.01687.01687.2 | 2 | 895.4491 | AYLEEECEPEMLK         | YES | AZGP1         |
| 0.5243 | QS20070624_P0149_HY109_04.01688.01688.2 | 2 | 625.1859 | ILLMDNKK              | no  | LRRTM2        |
| 1      | QS20070624_P0149_HY109_04.01695.01695.3 | 3 | 699.3895 | DIAFEVEDCDHIVQK       | YES | HPD           |
| 0.2655 | QS20070624_P0149_HY109_04.01697.01697.2 | 2 | 913.4565 | GQAGA AVPGGGGGGGEVAVR | no  | C630007C17RIK |
| 0.9997 | QS20070624_P0149_HY109_04.01705.01705.3 | 3 | 586.6307 | DLEIEEVLPHPK          | YES | CFB           |
| 0.9828 | QS20070624_P0149_HY109_04.01716.01716.2 | 2 | 686.772  | LLWENGLLR             | no  | C3            |

|        |                                         |   |          |                         |     |               |
|--------|-----------------------------------------|---|----------|-------------------------|-----|---------------|
| 0.9832 | QS20070624_P0149_HY109_04.01719.01719.2 | 2 | 751.7866 | SINGTFFGGWK             | YES | ADH4          |
| 0.6349 | QS20070624_P0149_HY109_04.01729.01729.3 | 3 | 514.5653 | FLASVSTVLTSK            | no  | HBA-A1        |
| 0.9561 | QS20070624_P0149_HY109_04.01736.01736.3 | 3 | 829.2089 | LGEHNINVLGNEQFVNAAK     | no  | UNKNOWN       |
| 0.618  | QS20070624_P0149_HY109_04.01748.01748.3 | 3 | 829.2089 | LGEHNINVLGNEQFVNAAK     | no  | UNKNOWN       |
| 0.9999 | QS20070624_P0149_HY109_04.01753.01753.3 | 3 | 939.6555 | DDNPSLPPFERPEAEAMCTSFK  | no  | ALB           |
| 0.9996 | QS20070624_P0149_HY109_04.01759.01759.3 | 3 | 939.6555 | DDNPSLPPFERPEAEAMCTSFK  | no  | ALB           |
| 0.9981 | QS20070624_P0149_HY109_04.01763.01763.3 | 3 | 699.3895 | DIAFEVEDCDHIVQK         | YES | HPD           |
| 0.1449 | QS20070624_P0149_HY109_04.01767.01767.2 | 2 | 662.7101 | ILSSCPEIK               | no  | PROSC         |
| 0.5144 | QS20070624_P0149_HY109_04.01771.01771.2 | 2 | 817.83   | ACDMEFCSACK             | no  | RNF144        |
| 0.2786 | QS20070624_P0149_HY109_04.01781.01781.2 | 2 | 655.1989 | SEPCLLDWR               | no  | LIFR          |
| 0.7355 | QS20070624_P0149_HY109_04.01783.01783.3 | 3 | 598.6271 | ENEFFIVTQTCK            | no  | KNG1          |
| 0.9968 | QS20070624_P0149_HY109_04.01796.01796.3 | 3 | 786.1462 | DMQDGFDISHPWICDK        | no  | LRG1          |
| 0.9999 | QS20070624_P0149_HY109_04.01799.01799.3 | 3 | 786.1462 | DMQDGFDISHPWICDK        | no  | LRG1          |
| 0.1601 | QS20070624_P0149_HY109_04.01813.01813.2 | 2 | 590.5832 | HSGYNSVK                | no  | UNKNOWN       |
| 0.9952 | QS20070624_P0149_HY109_04.01817.01817.2 | 2 | 685.7845 | NLQEILIGAVR             | no  | EGFR          |
| 0.9864 | QS20070624_P0149_HY109_04.01824.01824.2 | 2 | 710.3218 | LLVVYPWTQR              | no  | HBB-B1        |
| 0.9441 | QS20070624_P0149_HY109_04.01825.01825.2 | 2 | 747.3397 | DIPVNPLCIYR             | no  | SERPINC1      |
| 0.8451 | QS20070624_P0149_HY109_04.01832.01832.2 | 2 | 850.3778 | DEELSCSVLELK            | no  | SERPINA3K     |
| 0.8543 | QS20070624_P0149_HY109_04.01841.01841.2 | 2 | 633.1779 | VQLFSSAPK               | no  | CEP164        |
| 0.9998 | QS20070624_P0149_HY109_04.01856.01856.3 | 3 | 699.3895 | DIAFEVEDCDHIVQK         | YES | HPD           |
| 0.6557 | QS20070624_P0149_HY109_04.01876.01876.2 | 2 | 594.1858 | LPLPALFK                | no  | SERPINF2      |
| 0.9461 | QS20070624_P0149_HY109_04.01884.01884.2 | 2 | 734.2827 | VFPDPLDTFK              | no  | SERPINA3N     |
| 0.9706 | QS20070624_P0149_HY109_04.01891.01891.2 | 2 | 689.2803 | ELISQFLNR               | no  | SERPINA1D     |
| 0.841  | QS20070624_P0149_HY109_04.01893.01893.2 | 2 | 751.7866 | SINGTFFGGWK             | YES | ADH4          |
| 0.1251 | QS20070624_P0149_HY109_04.01893.01893.3 | 3 | 750.8132 | AMGDYLVGVHTDEEIAK       | YES | PCYT2         |
| 0.9986 | QS20070624_P0149_HY109_04.01903.01903.2 | 2 | 726.2894 | TMEIELEGLK              | no  | SERPINA3K     |
| 0.9864 | QS20070624_P0149_HY109_04.01911.01911.2 | 2 | 730.289  | TGWSFLPTCR              | no  | APOH          |
| 0.9358 | QS20070624_P0149_HY109_04.01921.01921.2 | 2 | 789.4131 | MSPYINLIPLK             | no  | C9            |
| 0.9946 | QS20070624_P0149_HY109_04.01928.01928.2 | 2 | 895.4491 | AYLEEECEPEMLK           | YES | AZGP1         |
| 0.9952 | QS20070624_P0149_HY109_04.01936.01936.2 | 2 | 812.3108 | WTDCFCQDK               | no  | C8A           |
| 0.9665 | QS20070624_P0149_HY109_04.01947.01947.2 | 2 | 576.141  | TLEDILFR                | YES | FGG           |
| 1      | QS20070624_P0149_HY109_04.01964.01964.3 | 3 | 763.1722 | AVLDVAETGTEAAAATGVIGGIR | no  | SERPINA3K     |
| 0.7948 | QS20070624_P0149_HY109_04.01973.01973.2 | 2 | 726.2894 | TMEIELEGLK              | no  | SERPINA3K     |
| 0.3235 | QS20070624_P0149_HY109_04.01976.01976.2 | 2 | 991.5493 | EDLVYLTSDSPNVLK         | no  | RG9MTD2       |
| 1      | QS20070624_P0149_HY109_04.01993.01993.3 | 3 | 782.1765 | EVEPGTLCVAGWGVVTHAGR    | no  | CFD           |
| 0.9853 | QS20070624_P0149_HY109_04.01995.01995.2 | 2 | 732.8025 | DLTFYLIK                | no  | PZP           |
| 1      | QS20070624_P0149_HY109_04.01999.01999.3 | 3 | 850.9095 | DQSPASHEIATNLGDFAIPLYR  | no  | SPII-6        |
| 0.9988 | QS20070624_P0149_HY109_04.02000.02000.2 | 2 | 895.4491 | AYLEEECEPEMLK           | YES | AZGP1         |
| 0.6718 | QS20070624_P0149_HY109_04.02011.02011.2 | 2 | 696.2359 | ETFMDCLEGR              | no  | F2            |
| 0.4197 | QS20070624_P0149_HY109_04.02015.02015.3 | 3 | 784.8368 | HRPGALTNGINPDTSTEIGR    | no  | 181004A24RIK  |
| 0.6546 | QS20070624_P0149_HY109_04.02033.02033.2 | 2 | 518.0623 | ERPCLAR                 | no  | 4632411J06RIK |
| 0.9994 | QS20070624_P0149_HY109_04.02043.02043.3 | 3 | 750.8132 | AMGDYLVGVHTDEEIAK       | YES | PCYT2         |
| 0.9999 | QS20070624_P0149_HY109_04.02047.02047.3 | 3 | 750.8132 | AMGDYLVGVHTDEEIAK       | YES | PCYT2         |
| 0.9999 | QS20070624_P0149_HY109_04.02059.02059.3 | 3 | 699.3895 | DIAFEVEDCDHIVQK         | YES | HPD           |
| 1      | QS20070624_P0149_HY109_04.02067.02067.3 | 3 | 850.9095 | DQSPASHEIATNLGDFAIPLYR  | no  | SPII-6        |
| 1      | QS20070624_P0149_HY109_04.02071.02071.3 | 3 | 869.6125 | LFQEEFPGIPPDAAVECHR     | no  | HPXN          |
| 0.9995 | QS20070624_P0149_HY109_04.02081.02081.3 | 3 | 757.4621 | YFDSFGDLSSASAIMGNAK     | no  | HBB-B1        |
| 0.9829 | QS20070624_P0149_HY109_04.02111.02111.2 | 2 | 671.2418 | ADYLALVFER              | no  | QSCN6         |
| 1      | QS20070624_P0149_HY109_04.02135.02135.3 | 3 | 850.9095 | DQSPASHEIATNLGDFAIPLYR  | no  | SPII-6        |

|        |                                         |   |          |                              |     |               |
|--------|-----------------------------------------|---|----------|------------------------------|-----|---------------|
| 0.2562 | QS20070624_P0149_HY109_04.02136.02136.3 | 3 | 710.7559 | TSLAVTASIPSSYTSVEK           | no  | NUP210        |
| 0.9119 | QS20070624_P0149_HY109_04.02172.02172.2 | 2 | 747.7943 | NLFDELVLDK                   | no  | MUG1          |
| 0.7817 | QS20070624_P0149_HY109_04.02184.02184.3 | 3 | 639.3649 | YQIPNDLQCVFIK                | no  | KLK1B27       |
| 0.9663 | QS20070624_P0149_HY109_04.02187.02187.2 | 2 | 794.8886 | EEIVYLPCIYR                  | no  | SELENBP1      |
| 1      | QS20070624_P0149_HY109_04.02204.02204.3 | 3 | 850.9095 | DQSPASHEIATNLGDFAIISLYR      | no  | SPI1-6        |
| 0.9043 | QS20070624_P0149_HY109_04.02207.02207.2 | 2 | 902.029  | VDEMTIPTVDVILGR              | YES | ADH4          |
| 0.9979 | QS20070624_P0149_HY109_04.02216.02216.3 | 3 | 556.6044 | EGNTWLTAFVLK                 | no  | MUG1          |
| 1      | QS20070624_P0149_HY109_04.02220.02220.3 | 3 | 966.0324 | VLGPDSAANLELINTWVAENTNHK     | no  | SERPING1      |
| 0.9733 | QS20070624_P0149_HY109_04.02223.02223.2 | 2 | 834.403  | EGNTWLTAFVLK                 | no  | MUG1          |
| 1      | QS20070624_P0149_HY109_04.02227.02227.3 | 3 | 966.0324 | VLGPDSAANLELINTWVAENTNHK     | no  | SERPING1      |
| 1      | QS20070624_P0149_HY109_04.02231.02231.3 | 3 | 966.0324 | VLGPDSAANLELINTWVAENTNHK     | no  | SERPING1      |
| 0.9979 | QS20070624_P0149_HY109_04.02235.02235.3 | 3 | 699.3895 | DIAFEVEDCDHIVQK              | YES | HPD           |
| 0.9999 | QS20070624_P0149_HY109_04.02243.02243.3 | 3 | 850.9095 | DQSPASHEIATNLGDFAIISLYR      | no  | SPI1-6        |
| 0.3221 | QS20070624_P0149_HY109_04.02253.02253.3 | 3 | 795.5332 | AEDLAPGDISSFLTAALYK          | no  | UNKNOWN       |
| 1      | QS20070624_P0149_HY109_04.02255.02255.3 | 3 | 833.8525 | ISFDPQDTFESEFYLDEK           | no  | SERPINA3K     |
| 1      | QS20070624_P0149_HY109_04.02267.02267.3 | 3 | 833.8525 | ISFDPQDTFESEFYLDEK           | no  | SERPINA3K     |
| 1      | QS20070624_P0149_HY109_04.02271.02271.3 | 3 | 850.9095 | DQSPASHEIATNLGDFAIISLYR      | no  | SPI1-6        |
| 0.5052 | QS20070624_P0149_HY109_04.02272.02272.2 | 2 | 783.3514 | YVNWVQQTIAAN                 | no  | 2210010C04RIK |
| 0.2944 | QS20070624_P0149_HY109_04.02287.02287.2 | 2 | 820.4375 | RSHFVLIAGEPLR                | no  | PIR           |
| 0.3521 | QS20070624_P0149_HY109_04.02289.02289.3 | 3 | 850.9095 | DQSPASHEIATNLGDFAIISLYR      | no  | SPI1-6        |
| 0.997  | QS20070624_P0149_HY109_04.02301.02301.2 | 2 | 755.8156 | SIFSAYLDELK                  | YES | CPS1          |
| 1      | QS20070624_P0149_HY109_04.02328.02328.3 | 3 | 1117.838 | THHTCPDCPSIDLSNPSALEAATESLAK | no  | FETUB         |
| 1      | QS20070624_P0149_HY109_04.02335.02335.3 | 3 | 1117.838 | THHTCPDCPSIDLSNPSALEAATESLAK | no  | FETUB         |
| 0.8939 | QS20070624_P0149_HY109_04.02357.02357.3 | 3 | 597.3018 | AYLEEECPPEMLK                | YES | AZGP1         |
| 0.9999 | QS20070624_P0149_HY109_04.02361.02361.3 | 3 | 850.9095 | DQSPASHEIATNLGDFAIISLYR      | no  | SPI1-6        |
| 0.9661 | QS20070624_P0149_HY109_04.02368.02368.3 | 3 | 750.1513 | VWCTWPAPLGVSPGTVK            | no  | LIFR          |
| 0.8674 | QS20070624_P0149_HY109_04.02375.02375.3 | 3 | 661.0564 | GVAWSNPFPECVIVK              | no  | C4BP          |
| 0.9761 | QS20070624_P0149_HY109_04.02381.02381.2 | 2 | 834.9116 | DFLIPVAWYEDR                 | no  | HGD           |
| 1      | QS20070624_P0149_HY109_04.02403.02403.3 | 3 | 798.5211 | ISEDCLYLNISPADLTK            | no  | ES1           |
| 1      | QS20070624_P0149_HY109_04.02407.02407.3 | 3 | 798.5211 | ISEDCLYLNISPADLTK            | no  | ES1           |
| 0.8322 | QS20070624_P0149_HY109_04.02424.02424.3 | 3 | 850.9095 | DQSPASHEIATNLGDFAIISLYR      | no  | SPI1-6        |
| 0.9701 | QS20070624_P0149_HY109_04.02435.02435.2 | 2 | 802.8508 | GNTLEEILEGLK                 | no  | SERPINA3M     |
| 0.9832 | QS20070624_P0149_HY109_04.02436.02436.3 | 3 | 900.6188 | LSVLCQDNYLTQDSEEMVCK         | no  | CFH           |
| 0.467  | QS20070624_P0149_HY109_04.02443.02443.3 | 3 | 799.1664 | NGSGELGYGEVVISLEKPGGR        | no  | SALL2         |
| 0.9988 | QS20070624_P0149_HY109_04.02503.02503.2 | 2 | 877.9569 | DVFLGTFLYEYSR                | no  | ALB           |
| 0.9109 | QS20070624_P0149_HY109_04.02545.02545.3 | 3 | 761.5731 | QVLLIFLLLVGAGSEPRR           | no  | PCDHB22       |
| 1      | QS20070624_P0149_HY109_04.02568.02568.3 | 3 | 912.3257 | GPDEEHLGILGPVIAEVGDTIK       | no  | CP            |
| 0.3742 | QS20070624_P0149_HY109_04.02569.02569.2 | 2 | 1072.096 | DFDEFTHDNDIMLK               | no  | 2700097O09RIK |
| 0.9673 | QS20070624_P0149_HY109_04.02571.02571.2 | 2 | 877.9569 | DVFLGTFLYEYSR                | no  | ALB           |
| 1      | QS20070624_P0149_HY109_04.02623.02623.3 | 3 | 762.4805 | GITWGEDTLMEYLENPK            | no  | CYCS          |
| 1      | QS20070624_P0149_HY109_04.02624.02624.2 | 2 | 1162.816 | LSISGNYNLETMSPLGITR          | no  | SERPINA1E     |
| 1      | QS20070624_P0149_HY109_04.02627.02627.3 | 3 | 762.4805 | GITWGEDTLMEYLENPK            | no  | CYCS          |
| 0.9994 | QS20070624_P0149_HY109_04.02639.02639.3 | 3 | 861.5891 | ELGSPPGISLETIDAAFSCPGSSR     | no  | HPXN          |
| 0.9334 | QS20070624_P0149_HY109_04.02640.02640.2 | 2 | 877.9569 | DVFLGTFLYEYSR                | no  | ALB           |
| 0.415  | QS20070624_P0149_HY109_04.02723.02723.2 | 2 | 820.4375 | RSHFVLIAGEPLR                | no  | PIR           |
| 0.9967 | QS20070624_P0149_HY109_04.02724.02724.3 | 3 | 700.1447 | FALEIPVEFSMVPMAK             | no  | MUG1          |
| 0.5572 | QS20070624_P0149_HY109_04.02756.02756.3 | 3 | 832.2229 | AEPLYELVTATDFAYSSTVK         | no  | C8B           |
| 0.9968 | QS20070624_P0149_HY109_04.02763.02763.3 | 3 | 832.2229 | AEPLYELVTATDFAYSSTVK         | no  | C8B           |
| 1      | QS20070624_P0149_HY109_04.02792.02792.2 | 2 | 874.4881 | DIASGLIGPLILCK               | no  | CP            |

|        |                                         |   |          |                            |     |               |
|--------|-----------------------------------------|---|----------|----------------------------|-----|---------------|
| 1      | QS20070624_P0149_HY109_04.02795.02795.2 | 2 | 874.4881 | DIASGLIGLILCK              | no  | CP            |
| 0.9999 | QS20070624_P0149_HY109_04.02799.02799.3 | 3 | 583.3278 | DIASGLIGLILCK              | no  | CP            |
| 0.9958 | QS20070624_P0149_HY109_04.02803.02803.3 | 3 | 940.6649 | AVLTSQETLFGGSDCTGNFCLFK    | no  | TF            |
| 0.9976 | QS20070624_P0149_HY109_04.02824.02824.3 | 3 | 744.831  | LPAGLPTSLTLYLDNNK          | no  | LUM           |
| 0.8669 | QS20070624_P0149_HY109_04.02847.02847.2 | 2 | 855.4799 | DLYSGLIGLIVCR              | no  | CP            |
| 0.9946 | QS20070624_P0149_HY109_04.02851.02851.2 | 2 | 855.4799 | DLYSGLIGLIVCR              | no  | CP            |
| 0.2318 | QS20070624_P0149_HY109_04.02852.02852.3 | 3 | 854.2545 | EFVEEFWPAVQSSALYEDR        | no  | ASS1          |
| 1      | QS20070624_P0149_HY109_04.02917.02917.2 | 2 | 1045.614 | DSPVLLDFEDELRYR            | no  | HRG           |
| 0.9703 | QS20070624_P0149_HY109_04.02919.02919.3 | 3 | 967.0789 | MLIYTILPDGEVIADSVNFEIEK    | no  | MUG1          |
| 0.9998 | QS20070624_P0149_HY109_04.02935.02935.3 | 3 | 967.0789 | MLIYTILPDGEVIADSVNFEIEK    | no  | MUG1          |
| 1      | QS20070624_P0149_HY109_04.03069.03069.3 | 3 | 1115.881 | GFADQFLYESSNYGQAPLPLLVAYTK | no  | GC            |
| 1      | QS20070624_P0149_HY109_04.03257.03257.2 | 2 | 1154.743 | IPESGGDNGVDFIFELIGGAR      | no  | THBS1         |
| 0.9989 | QS20070624_P0149_HY109_04.03407.03407.3 | 3 | 1054.815 | TELNIELLDFFDEYTMTIQQVIK    | no  | C3            |
| 0.9997 | QS20070624_P0149_HY109_06.00504.00504.3 | 3 | 524.2332 | ADHSTLLFHLK                | YES | ASGR2         |
| 1      | QS20070624_P0149_HY109_06.00507.00507.3 | 3 | 554.5859 | GATYAFTGSHYWR              | no  | HPXN          |
| 1      | QS20070624_P0149_HY109_06.00512.00512.3 | 3 | 703.7388 | TYFPHFVSHGSAQVK            | no  | HBA-A1        |
| 0.1596 | QS20070624_P0149_HY109_06.00523.00523.2 | 2 | 1165.212 | IQEITEQLDITTSYEYK          | no  | HSPD1         |
| 0.9848 | QS20070624_P0149_HY109_06.00532.00532.3 | 3 | 645.6703 | KPVDQYEDCYLAR              | YES | TF            |
| 0.2142 | QS20070624_P0149_HY109_06.00533.00533.2 | 2 | 1020.572 | HFGLEIQATWYEK              | no  | ANGPTL7       |
| 0.9771 | QS20070624_P0149_HY109_06.00537.00537.3 | 3 | 645.6703 | KPVDQYEDCYLAR              | YES | TF            |
| 0.9989 | QS20070624_P0149_HY109_06.00567.00567.2 | 2 | 801.8657 | HTTIFEVLPEK                | YES | TF            |
| 0.1662 | QS20070624_P0149_HY109_06.00569.00569.2 | 2 | 941.9824 | AAAGGAGAAGGAGAAEVAGPGAR    | no  | 493142911IRIK |
| 1      | QS20070624_P0149_HY109_06.00575.00575.2 | 2 | 716.7614 | LCENIAGHLK                 | YES | CAT           |
| 0.9949 | QS20070624_P0149_HY109_06.00581.00581.3 | 3 | 664.0753 | AHMVTLDTYVQVPGTGR          | YES | GNMT          |
| 0.784  | QS20070624_P0149_HY109_06.00587.00587.3 | 3 | 825.5363 | DSLCSLSMCELSVSSGFK         | no  | BC021381      |
| 1      | QS20070624_P0149_HY109_06.00596.00596.3 | 3 | 564.2927 | YEALLTHETSIR               | YES | FGG           |
| 1      | QS20070624_P0149_HY109_06.00597.00597.3 | 3 | 683.0789 | ENPTTFMGHYLHEVAR           | no  | ALB           |
| 0.9826 | QS20070624_P0149_HY109_06.00599.00599.2 | 2 | 722.8038 | HPDYSVSLLR                 | no  | ALB           |
| 0.9971 | QS20070624_P0149_HY109_06.00600.00600.2 | 2 | 658.745  | LLIGTVFHK                  | YES | PON1          |
| 0.9547 | QS20070624_P0149_HY109_06.00611.00611.2 | 2 | 716.7614 | LCENIAGHLK                 | YES | CAT           |
| 1      | QS20070624_P0149_HY109_06.00623.00623.3 | 3 | 764.135  | QLTEHAVEGDCDFHILK          | no  | AHSG          |
| 0.9968 | QS20070624_P0149_HY109_06.00625.00625.3 | 3 | 509.5433 | LEDIVTYHCSR                | YES | CFB           |
| 0.9989 | QS20070624_P0149_HY109_06.00627.00627.2 | 2 | 794.9123 | HSLMPMLETLK                | no  | APOA1         |
| 0.9938 | QS20070624_P0149_HY109_06.00628.00628.3 | 3 | 859.2239 | AETFTFHSDICTLPEKEK         | no  | ALB           |
| 1      | QS20070624_P0149_HY109_06.00632.00632.3 | 3 | 721.1099 | RPCFSALTVDETYVPK           | no  | ALB           |
| 0.9999 | QS20070624_P0149_HY109_06.00635.00635.3 | 3 | 544.5789 | DLQLAEFHEK                 | no  | SERPINA3K     |
| 0.9737 | QS20070624_P0149_HY109_06.00637.00637.2 | 2 | 777.8181 | GFSQSLSVQWDR               | YES | AZGP1         |
| 1      | QS20070624_P0149_HY109_06.00643.00643.2 | 2 | 939.4992 | FLGVAEQLHNEGFK             | YES | CPS1          |
| 0.9997 | QS20070624_P0149_HY109_06.00647.00647.3 | 3 | 626.6685 | FLGVAEQLHNEGFK             | YES | CPS1          |
| 0.9999 | QS20070624_P0149_HY109_06.00651.00651.3 | 3 | 626.6685 | FLGVAEQLHNEGFK             | YES | CPS1          |
| 0.254  | QS20070624_P0149_HY109_06.00652.00652.3 | 3 | 491.8736 | IIGILEVGQDK                | no  | EG235580      |
| 0.9998 | QS20070624_P0149_HY109_06.00653.00653.3 | 3 | 575.6616 | YLLGTSLARPCAR              | YES | ASS1          |
| 0.9457 | QS20070624_P0149_HY109_06.00660.00660.2 | 2 | 666.7152 | DLELLASGVDR                | YES | C3            |
| 0.9981 | QS20070624_P0149_HY109_06.00667.00667.3 | 3 | 478.1767 | LCENIAGHLK                 | YES | CAT           |
| 0.9946 | QS20070624_P0149_HY109_06.00687.00687.2 | 2 | 674.7812 | PYLLISTQIR                 | no  | GCHFR         |
| 1      | QS20070624_P0149_HY109_06.00688.00688.3 | 3 | 536.2541 | FAQLCEEHGILR               | no  | UNKNOWN       |
| 0.997  | QS20070624_P0149_HY109_06.00699.00699.3 | 3 | 626.6685 | FLGVAEQLHNEGFK             | YES | CPS1          |
| 0.4639 | QS20070624_P0149_HY109_06.00719.00719.3 | 3 | 954.0075 | GLFGSGGAAGCGVPGAGADGYLAPPK | no  | FOXL2         |
| 0.1949 | QS20070624_P0149_HY109_06.00725.00725.2 | 2 | 823.3575 | AFIDCCNHITK                | no  | C3            |

|        |                                         |   |          |                                 |     |               |
|--------|-----------------------------------------|---|----------|---------------------------------|-----|---------------|
| 0.6625 | QS20070624_P0149_HY109_06.00727.00727.2 | 2 | 624.7137 | ILLMDLNK                        | YES | PON1          |
| 0.9989 | QS20070624_P0149_HY109_06.00728.00728.3 | 3 | 549.2407 | AFIDCCNHITK                     | no  | C3            |
| 0.3208 | QS20070624_P0149_HY109_06.00732.00732.3 | 3 | 575.6616 | YLLGTSLARPCAR                   | YES | ASS1          |
| 0.9979 | QS20070624_P0149_HY109_06.00735.00735.3 | 3 | 549.2407 | AFIDCCNHITK                     | no  | C3            |
| 0.9999 | QS20070624_P0149_HY109_06.00737.00737.3 | 3 | 720.4764 | AHEHIFGMVLMNDWSAR               | YES | FAH           |
| 0.9999 | QS20070624_P0149_HY109_06.00745.00745.3 | 3 | 725.4274 | AETFTFHSDICTLPEK                | no  | ALB           |
| 0.7764 | QS20070624_P0149_HY109_06.00769.00769.3 | 3 | 589.6233 | KNLFDELVLVDK                    | no  | MUG1          |
| 0.3747 | QS20070624_P0149_HY109_06.00773.00773.3 | 3 | 440.8396 | NLIPLEAHR                       | no  | C330023D02RIK |
| 1      | QS20070624_P0149_HY109_06.00796.00796.3 | 3 | 682.7329 | VITAFNDGLNHLDSLK                | no  | HBB-B1        |
| 0.9968 | QS20070624_P0149_HY109_06.00799.00799.3 | 3 | 477.2037 | ILLGAEQVVK                      | no  | RHOT2         |
| 0.9598 | QS20070624_P0149_HY109_06.00800.00800.3 | 3 | 515.8838 | KWFWDFAFR                       | no  | HPXN          |
| 0.999  | QS20070624_P0149_HY109_06.00819.00819.3 | 3 | 554.2763 | GWFEPIVDMHR                     | no  | APOE          |
| 0.2683 | QS20070624_P0149_HY109_06.00824.00824.2 | 2 | 833.8904 | GPQIWTAVAGHPSK                  | no  | PARP4         |
| 1      | QS20070624_P0149_HY109_06.00828.00828.3 | 3 | 699.3895 | DIAFEVEDCDHIVQK                 | YES | HPD           |
| 0.1902 | QS20070624_P0149_HY109_06.00829.00829.3 | 3 | 510.2331 | LVALCDVLYGK                     | no  | BST1          |
| 0.8505 | QS20070624_P0149_HY109_06.00848.00848.2 | 2 | 751.7866 | SINGTFFGGWK                     | YES | ADH4          |
| 1      | QS20070624_P0149_HY109_06.00855.00855.3 | 3 | 586.6307 | DLEIEEVLPHPK                    | YES | CFB           |
| 0.9998 | QS20070624_P0149_HY109_06.00883.00883.3 | 3 | 583.6597 | AHFSVMGDILSSAIR                 | no  | MUG1          |
| 0.3699 | QS20070624_P0149_HY109_06.00884.00884.3 | 3 | 559.2635 | RGTTDLSEALPK                    | no  | 2610101J03RIK |
| 1      | QS20070624_P0149_HY109_06.00887.00887.3 | 3 | 964.3458 | HSLGDNDASHIFQSVGINIFTNSK        | no  | PZP           |
| 0.285  | QS20070624_P0149_HY109_06.00888.00888.3 | 3 | 723.4124 | CYVCDQQTNGVFNPAK                | no  | RNF113A1      |
| 0.9998 | QS20070624_P0149_HY109_06.00907.00907.3 | 3 | 964.3458 | HSLGDNDASHIFQSVGINIFTNSK        | no  | PZP           |
| 1      | QS20070624_P0149_HY109_06.00915.00915.3 | 3 | 774.1789 | GSIFNLGSHVLSLEQGNMK             | no  | PZP           |
| 0.9034 | QS20070624_P0149_HY109_06.00920.00920.3 | 3 | 670.7261 | KPWNVSVLIYETK                   | no  | C9            |
| 1      | QS20070624_P0149_HY109_06.00928.00928.3 | 3 | 645.058  | YTPEQVAMATVTALHR                | no  | ALDOB         |
| 0.9999 | QS20070624_P0149_HY109_06.00936.00936.3 | 3 | 622.6943 | EEHSFTVMEFVLPK                  | no  | MUG1          |
| 0.6117 | QS20070624_P0149_HY109_06.00941.00941.2 | 2 | 850.3778 | DEELSCSVLELK                    | no  | SERPINA3K     |
| 0.2437 | QS20070624_P0149_HY109_06.00943.00943.3 | 3 | 583.9806 | RVDMQVGMQAGER                   | no  | ALPK3         |
| 0.2578 | QS20070624_P0149_HY109_06.00965.00965.3 | 3 | 953.3161 | GAANLQLIQALSDEEHDSAWDGR         | no  | WDR23         |
| 0.2125 | QS20070624_P0149_HY109_06.00968.00968.3 | 3 | 631.9864 | NGNLPEFGDAIATSK                 | no  | TLN1          |
| 0.1458 | QS20070624_P0149_HY109_06.00976.00976.2 | 2 | 633.7136 | FLTAISVVK                       | no  | PAXIP1        |
| 0.9999 | QS20070624_P0149_HY109_06.00992.00992.3 | 3 | 789.1913 | AVTHVGMDESEIIFVDWK              | no  | ORM1          |
| 1      | QS20070624_P0149_HY109_06.01035.01035.3 | 3 | 684.0877 | LTQLGTFFEDHFLSLQR               | no  | EGFR          |
| 1      | QS20070624_P0149_HY109_06.01040.01040.3 | 3 | 617.027  | YEGGVETFAHLIVLR                 | no  | ORM1          |
| 0.1794 | QS20070624_P0149_HY109_06.01043.01043.3 | 3 | 643.6838 | SHGSPETLVLTNTRK                 | no  | TREM3         |
| 1      | QS20070624_P0149_HY109_06.01045.01045.3 | 3 | 730.1185 | TFGLGEADCGLRPLFEK               | no  | F2            |
| 0.5521 | QS20070624_P0149_HY109_06.01056.01056.3 | 3 | 1215.7   | VAATLQVPVNSLNADLIQVAFFTCSFDLAIK | no  | MINPP1        |
| 0.9304 | QS20070624_P0149_HY109_06.01060.01060.2 | 2 | 576.141  | TLEDILFR                        | YES | FGG           |
| 1      | QS20070624_P0149_HY109_06.01080.01080.3 | 3 | 766.1617 | YGCETADQLHILNEVPR               | no  | C8G           |
| 0.806  | QS20070624_P0149_HY109_06.01085.01085.2 | 2 | 602.1855 | IIWELIK                         | no  | IDH1          |
| 0.6134 | QS20070624_P0149_HY109_06.01088.01088.3 | 3 | 751.7811 | EYPNLPPTSSQYCGHK                | no  | AW554918      |
| 0.5723 | QS20070624_P0149_HY109_06.01092.01092.3 | 3 | 912.369  | ILELLTVTRPNAVALVDAFDK           | no  | ACOX1         |
| 0.3022 | QS20070624_P0149_HY109_06.01097.01097.3 | 3 | 912.369  | ILELLTVTRPNAVALVDAFDK           | no  | ACOX1         |
| 1      | QS20070624_P0149_HY109_06.01101.01101.3 | 3 | 850.9095 | DQSPASHEIATNLGDFAIPLYR          | no  | SPI1-6        |
| 0.3209 | QS20070624_P0149_HY109_06.01107.01107.3 | 3 | 713.4523 | GELFQAFIDTAQHMLK                | no  | D2ERTD435E    |
| 1      | QS20070624_P0149_HY109_06.01116.01116.3 | 3 | 1263.703 | SFQHLQLTRNRPDSELQLSTGNGLFVNNDLK | no  | SPI1-6        |
| 0.2119 | QS20070624_P0149_HY109_06.01124.01124.3 | 3 | 665.0546 | GGMLANDTVIAELKK                 | no  | UNKNOWN       |
| 0.9999 | QS20070624_P0149_HY109_06.01133.01133.3 | 3 | 869.6125 | LFQEEFPGIPYPPDAAVECHR           | no  | HPXN          |
| 0.1066 | QS20070624_P0149_HY109_06.01145.01145.2 | 2 | 1262.818 | VEDLSAEWDMGGKVQDIK              | no  | FSD1          |



|        |                                         |   |          |                                 |     |               |
|--------|-----------------------------------------|---|----------|---------------------------------|-----|---------------|
| 1      | QS20070624_P0149_HY109_06.01176.01176.3 | 3 | 1263.703 | SFQHLLQTLNRPDSELQLSTGNGLFVNNDLK | no  | SP11-6        |
| 1      | QS20070624_P0149_HY109_06.01191.01191.3 | 3 | 681.4179 | EALIQFLEQVHQGIK                 | no  | CPN1          |
| 0.3901 | QS20070624_P0149_HY109_06.01212.01212.3 | 3 | 595.2957 | SNFSVQETQTLK                    | no  | 8430410K20RIK |
| 1      | QS20070624_P0149_HY109_06.01225.01225.3 | 3 | 1263.703 | SFQHLLQTLNRPDSELQLSTGNGLFVNNDLK | no  | SP11-6        |
| 0.8813 | QS20070624_P0149_HY109_06.01228.01228.3 | 3 | 595.2957 | SNFSVQETQTLK                    | no  | 8430410K20RIK |
| 0.3122 | QS20070624_P0149_HY109_06.01239.01239.3 | 3 | 595.2957 | SNFSVQETQTLK                    | no  | 8430410K20RIK |
| 0.9996 | QS20070624_P0149_HY109_06.01245.01245.3 | 3 | 721.4769 | KLDILSNDLVINMLK                 | no  | FBP1          |
| 0.8487 | QS20070624_P0149_HY109_06.01304.01304.3 | 3 | 595.2957 | SNFSVQETQTLK                    | no  | 8430410K20RIK |
| 0.998  | QS20070624_P0149_HY109_06.01307.01307.3 | 3 | 728.4742 | YCTAISGDLHILPVAFK               | no  | EGFR          |
| 0.9331 | QS20070624_P0149_HY109_06.01313.01313.2 | 2 | 637.185  | WFWDFATR                        | no  | HPXN          |
| 1      | QS20070624_P0149_HY109_06.01320.01320.3 | 3 | 833.8525 | ISDPQDTESEFYLDEK                | no  | SERPINA3K     |
| 0.6574 | QS20070624_P0149_HY109_06.01341.01341.2 | 2 | 746.7866 | SLEVLNLSNK                      | no  | OMG           |
| 0.9378 | QS20070624_P0149_HY109_06.01343.01343.2 | 2 | 631.6989 | LWWLDLK                         | no  | HPXN          |
| 0.2996 | QS20070624_P0149_HY109_06.01349.01349.3 | 3 | 421.4684 | LWWLDLK                         | no  | HPXN          |
| 1      | QS20070624_P0149_HY109_06.01359.01359.3 | 3 | 723.4806 | LVPFVQLSGHLAQETER               | no  | APOA4         |
| 0.9497 | QS20070624_P0149_HY109_06.01361.01361.3 | 3 | 927.9975 | TNCDLYEKLGEYGFQNAILVR           | no  | ALB           |
| 1      | QS20070624_P0149_HY109_06.01367.01367.3 | 3 | 723.4806 | LVPFVQLSGHLAQETER               | no  | APOA4         |
| 1      | QS20070624_P0149_HY109_06.01379.01379.3 | 3 | 723.4806 | LVPFVQLSGHLAQETER               | no  | APOA4         |
| 0.7743 | QS20070624_P0149_HY109_06.01411.01411.3 | 3 | 630.6687 | GNLAHCYSAEELVHR                 | no  | HOXA11        |
| 1      | QS20070624_P0149_HY109_06.01412.01412.3 | 3 | 1051.797 | VADALANAAGHLDDLPGALSALSDLHAHK   | no  | HBA-A1        |
| 0.4651 | QS20070624_P0149_HY109_06.01415.01415.3 | 3 | 725.0857 | SQCHSITSYFNSAPPAK               | no  | 6030441H18RIK |
| 0.5808 | QS20070624_P0149_HY109_06.01423.01423.3 | 3 | 630.6687 | GNLAHCYSAEELVHR                 | no  | HOXA11        |
| 0.9769 | QS20070624_P0149_HY109_06.01436.01436.3 | 3 | 885.2726 | LCAIPNRENYGELADCCTK             | no  | ALB           |
| 0.993  | QS20070624_P0149_HY109_06.01445.01445.3 | 3 | 736.5021 | VLSMTGVGQTLVWCLHK               | YES | GCHFR         |
| 0.9973 | QS20070624_P0149_HY109_06.01464.01464.2 | 2 | 755.8156 | SIFSAVLDELK                     | YES | CPS1          |
| 0.9347 | QS20070624_P0149_HY109_06.01465.01465.3 | 3 | 805.5922 | MLRPLNELLPLAYIEDPK              | no  | MUG1          |
| 0.9998 | QS20070624_P0149_HY109_06.01467.01467.3 | 3 | 805.5922 | MLRPLNELLPLAYIEDPK              | no  | MUG1          |
| 0.9989 | QS20070624_P0149_HY109_06.01471.01471.3 | 3 | 805.5922 | MLRPLNELLPLAYIEDPK              | no  | MUG1          |
| 0.9211 | QS20070624_P0149_HY109_06.01473.01473.3 | 3 | 829.2089 | LGEHNINVLGNEQFVNAAK             | no  | UNKNOWN       |
| 0.4626 | QS20070624_P0149_HY109_06.01476.01476.2 | 2 | 652.2038 | VLWNQLNK                        | no  | DOPEY2        |
| 0.1502 | QS20070624_P0149_HY109_06.01481.01481.2 | 2 | 749.2527 | SVEDQFNEIK                      | no  | MYH13         |
| 0.9371 | QS20070624_P0149_HY109_06.01505.01505.2 | 2 | 724.2875 | EDLIWEILK                       | no  | TF            |
| 0.9641 | QS20070624_P0149_HY109_06.01509.01509.3 | 3 | 537.9308 | ALLAYAFALAGNK                   | no  | PZP           |
| 0.8708 | QS20070624_P0149_HY109_06.01512.01512.3 | 3 | 829.2089 | LGEHNINVLGNEQFVNAAK             | no  | UNKNOWN       |
| 0.7906 | QS20070624_P0149_HY109_06.01532.01532.2 | 2 | 712.2942 | LAFIENLCGPR                     | no  | ECM1          |
| 0.3734 | QS20070624_P0149_HY109_06.01552.01552.3 | 3 | 748.4912 | ATLIVVHTDGSIVETTGLK             | no  | DEAF1         |
| 1      | QS20070624_P0149_HY109_06.01555.01555.2 | 2 | 884.9989 | GLVLIAFSQYLQK                   | no  | ALB           |
| 0.9991 | QS20070624_P0149_HY109_06.01560.01560.3 | 3 | 590.335  | GLVLIAFSQYLQK                   | no  | ALB           |
| 1      | QS20070624_P0149_HY109_06.01564.01564.2 | 2 | 755.8156 | SIFSAVLDELK                     | YES | CPS1          |
| 1      | QS20070624_P0149_HY109_06.01565.01565.2 | 2 | 839.9527 | VCPFAGILENGIVR                  | no  | APOH          |
| 0.1499 | QS20070624_P0149_HY109_06.01568.01568.3 | 3 | 1007.153 | FTAICKPLHYFVIMNPRLCVK           | no  | OLFR42        |
| 1      | QS20070624_P0149_HY109_06.01592.01592.3 | 3 | 1193.296 | LCMAALSHQPQEPPTYVEPTNDEICEAFR   | no  | GC            |
| 0.9994 | QS20070624_P0149_HY109_06.01605.01605.3 | 3 | 839.9419 | LILPYVELDLHSYDLGIENR            | no  | IDH1          |
| 0.9995 | QS20070624_P0149_HY109_06.01608.01608.3 | 3 | 1193.296 | LCMAALSHQPQEPPTYVEPTNDEICEAFR   | no  | GC            |
| 1      | QS20070624_P0149_HY109_06.01631.01631.2 | 2 | 755.8156 | SIFSAVLDELK                     | YES | CPS1          |
| 1      | QS20070624_P0149_HY109_06.01699.01699.2 | 2 | 755.8156 | SIFSAVLDELK                     | YES | CPS1          |
| 1      | QS20070624_P0149_HY109_06.01740.01740.2 | 2 | 755.8156 | SIFSAVLDELK                     | YES | CPS1          |
| 1      | QS20070624_P0149_HY109_06.01755.01755.3 | 3 | 1255.998 | AHCLSEVEHDTMPADLPAIAADFVEDQEVCK | no  | ALB           |
| 0.9966 | QS20070624_P0149_HY109_06.01787.01787.2 | 2 | 755.8156 | SIFSAVLDELK                     | YES | CPS1          |

|        |                                         |   |          |                          |     |           |
|--------|-----------------------------------------|---|----------|--------------------------|-----|-----------|
| 0.9833 | QS20070624_P0149_HY109_06.01799.01799.3 | 3 | 504.2128 | SIFSAVLDELK              | YES | CPS1      |
| 0.999  | QS20070624_P0149_HY109_06.01839.01839.3 | 3 | 605.3459 | WFFIGAAVLNPDYR           | no  | ORM2      |
| 1      | QS20070624_P0149_HY109_06.01868.01868.3 | 3 | 986.4065 | AYFPCIGCVHAISTDSPLEPVVK  | no  | KNG1      |
| 0.3945 | QS20070624_P0149_HY109_06.01896.01896.3 | 3 | 854.2023 | ASCQTHNLDHLDLSDNSLGGK    | no  | UNKNOWN   |
| 0.9998 | QS20070624_P0149_HY109_06.01928.01928.3 | 3 | 830.8936 | YNEDLELEDAIHTAILTK       | no  | PSMA2     |
| 0.2435 | QS20070624_P0149_HY109_06.01967.01967.2 | 2 | 851.9843 | VISLVSQEPVLFAR           | no  | ABCB9     |
| 0.1544 | QS20070624_P0149_HY109_06.01973.01973.3 | 3 | 835.5554 | SDDLQCVFITLLPNENCAK      | no  | KLK1B26   |
| 0.9908 | QS20070624_P0149_HY109_06.01977.01977.3 | 3 | 835.5554 | SDDLQCVFITLLPNENCAK      | no  | KLK1B26   |
| 0.762  | QS20070624_P0149_HY109_06.02035.02035.3 | 3 | 794.903  | YMNSGPVVAMVWEGLVVVK      | no  | NME2      |
| 1      | QS20070624_P0149_HY109_06.02041.02041.3 | 3 | 695.1457 | LPIICFDYGMVPISAPR        | no  | MUG1      |
| 0.9998 | QS20070624_P0149_HY109_06.02043.02043.3 | 3 | 695.1457 | LPIICFDYGMVPISAPR        | no  | MUG1      |
| 0.9913 | QS20070624_P0149_HY109_06.02044.02044.3 | 3 | 794.903  | YMNSGPVVAMVWEGLVVVK      | no  | NME2      |
| 1      | QS20070624_P0149_HY109_06.02061.02061.3 | 3 | 977.76   | AAPLSLICALTAVDQSVLLKPEAK | no  | PZP       |
| 0.9888 | QS20070624_P0149_HY109_06.02064.02064.2 | 2 | 859.4118 | VYMDFLEDCCSR             | no  | AFM       |
| 0.9844 | QS20070624_P0149_HY109_06.02075.02075.3 | 3 | 572.6463 | VGEVLNSILLELK            | no  | AGT       |
| 0.3927 | QS20070624_P0149_HY109_06.02077.02077.3 | 3 | 971.5156 | SSNVIVLLLAQIMGYFVSSVLLIR | no  | GPR89     |
| 0.9863 | QS20070624_P0149_HY109_06.02092.02092.3 | 3 | 604.3575 | ITFELIYQELLQR            | no  | ITH4      |
| 0.999  | QS20070624_P0149_HY109_06.02225.02225.3 | 3 | 584.6573 | GLLVGEFLSTVLSK           | no  | HC        |
| 1      | QS20070624_P0149_HY109_06.02235.02235.2 | 2 | 898.9973 | LPCVEDYLSAILNR           | no  | ALB       |
| 1      | QS20070624_P0149_HY109_06.02247.02247.2 | 2 | 898.9973 | LPCVEDYLSAILNR           | no  | ALB       |
| 0.9999 | QS20070624_P0149_HY109_06.02272.02272.3 | 3 | 795.2506 | YNPVVIDFEMQPIYQLLR       | no  | C8A       |
| 0.9999 | QS20070624_P0149_HY109_06.02279.02279.3 | 3 | 795.2506 | YNPVVIDFEMQPIYQLLR       | no  | C8A       |
| 1      | QS20070624_P0149_HY109_06.02283.02283.2 | 2 | 898.9973 | LPCVEDYLSAILNR           | no  | ALB       |
| 0.9998 | QS20070624_P0149_HY109_06.02315.02315.3 | 3 | 599.6673 | LPCVEDYLSAILNR           | no  | ALB       |
| 0.986  | QS20070624_P0149_HY109_06.02531.02531.2 | 2 | 782.8563 | DNIDDVISFIR              | no  | C9        |
| 0.9999 | QS20070624_P0149_HY109_06.02607.02607.3 | 3 | 763.8337 | ELDQDTVFALANYILFK        | no  | SERPINA1B |
| 1      | QS20070624_P0149_HY109_06.02615.02615.3 | 3 | 763.8337 | ELDQDTVFALANYILFK        | no  | SERPINA1B |
| 1      | QS20070624_P0149_HY109_06.02627.02627.3 | 3 | 720.7952 | LDQDTVFALANYILFK         | no  | SPI1-6    |
| 1      | QS20070624_P0149_HY109_06.02787.02787.3 | 3 | 862.962  | VPTANLENVPLAEDFTELSR     | no  | GC        |
| 1      | QS20070624_P0149_HY109_06.03263.03263.3 | 3 | 941.7088 | AQNVPLPVSTLVEFVIAATDCTAK | no  | AHSG      |
| 0.4188 | QS20070709_P0149_HY109_05.01427.01427.3 | 3 | 360.6844 | HSDFASK                  | no  | GC        |
| 0.2457 | QS20070709_P0149_HY109_05.01434.01434.3 | 3 | 447.124  | NKPGVYTK                 | no  | TMPRSS13  |
| 0.9999 | QS20070709_P0149_HY109_05.01437.01437.3 | 3 | 429.4462 | TPVSEHVTK                | no  | ALB       |
| 0.1924 | QS20070709_P0149_HY109_05.01438.01438.3 | 3 | 447.8312 | GSPAPPVVAPCR             | no  | HECTD1    |
| 0.9999 | QS20070709_P0149_HY109_05.01439.01439.3 | 3 | 481.5247 | TQLAPHSEQMR              | YES | APOA1     |
| 0.9913 | QS20070709_P0149_HY109_05.01443.01443.3 | 3 | 397.7323 | GPTHEFSK                 | no  | MUG1      |
| 0.8866 | QS20070709_P0149_HY109_05.01445.01445.3 | 3 | 357.7109 | LSQAVHK                  | no  | SPI1-6    |
| 0.9999 | QS20070709_P0149_HY109_05.01449.01449.3 | 3 | 492.8433 | SNPTLNEYHTR              | no  | APOA1     |
| 0.8111 | QS20070709_P0149_HY109_05.01451.01451.3 | 3 | 358.3782 | SNFEYLR                  | no  | CNOT10    |
| 0.3455 | QS20070709_P0149_HY109_05.01454.01454.3 | 3 | 429.7462 | CSYDEHAK                 | no  | ALB       |
| 0.9999 | QS20070709_P0149_HY109_05.01457.01457.3 | 3 | 365.4144 | IPSHAVVAR                | YES | TF        |
| 0.9807 | QS20070709_P0149_HY109_05.01459.01459.3 | 3 | 401.0776 | VHLTDAEK                 | no  | HBB-B2    |
| 0.2218 | QS20070709_P0149_HY109_05.01461.01461.3 | 3 | 507.1874 | EPVSLEEWNK               | no  | TBC1D15   |
| 0.8547 | QS20070709_P0149_HY109_05.01465.01465.3 | 3 | 438.4736 | NLKPAPIK                 | no  | PZP       |
| 0.9991 | QS20070709_P0149_HY109_05.01469.01469.3 | 3 | 472.1454 | KYEATLEK                 | no  | ALB       |
| 0.9397 | QS20070709_P0149_HY109_05.01470.01470.3 | 3 | 438.4736 | NLKPAPIK                 | no  | PZP       |
| 0.9848 | QS20070709_P0149_HY109_05.01473.01473.3 | 3 | 472.1454 | KYEATLEK                 | no  | ALB       |
| 0.6683 | QS20070709_P0149_HY109_05.01475.01475.3 | 3 | 503.5029 | KPFPENTK                 | no  | SERPINA1E |
| 0.2402 | QS20070709_P0149_HY109_05.01481.01481.3 | 3 | 416.7836 | MELERPGK                 | YES | FGA       |

|        |                                         |   |          |                    |     |               |
|--------|-----------------------------------------|---|----------|--------------------|-----|---------------|
| 0.2421 | QS20070709_P0149_HY109_05.01497.01497.3 | 3 | 419.4629 | TVLTGASGHLR        | no  | C3            |
| 0.1696 | QS20070709_P0149_HY109_05.01501.01501.3 | 3 | 411.7746 | KYEHVIR            | no  | D030022P06RIK |
| 0.9996 | QS20070709_P0149_HY109_05.01509.01509.3 | 3 | 394.4261 | SDAQIHIPR          | no  | SERPINA1D     |
| 0.942  | QS20070709_P0149_HY109_05.01513.01513.3 | 3 | 404.7538 | IENPHWK            | YES | ASGR2         |
| 0.9414 | QS20070709_P0149_HY109_05.01517.01517.3 | 3 | 404.7538 | IENPHWK            | YES | ASGR2         |
| 0.9958 | QS20070709_P0149_HY109_05.01521.01521.3 | 3 | 395.77   | ARPALEDLR          | no  | APOA1         |
| 0.9998 | QS20070709_P0149_HY109_05.01526.01526.3 | 3 | 414.458  | RPDITPELR          | no  | ORM1          |
| 0.7361 | QS20070709_P0149_HY109_05.01527.01527.3 | 3 | 463.1487 | YRPSFVSDK          | no  | ES1           |
| 0.9412 | QS20070709_P0149_HY109_05.01529.01529.3 | 3 | 446.8303 | THEQLTPLVR         | no  | APOA2         |
| 0.9998 | QS20070709_P0149_HY109_05.01531.01531.3 | 3 | 510.8834 | MQHLEQTLNK         | no  | SERPINA1D     |
| 0.1788 | QS20070709_P0149_HY109_05.01541.01541.3 | 3 | 445.1147 | VDHAGEYGANR        | no  | COQ7          |
| 0.3413 | QS20070709_P0149_HY109_05.01545.01545.3 | 3 | 415.8113 | MPQLIVQK           | no  | PCDH11X       |
| 0.2418 | QS20070709_P0149_HY109_05.01547.01547.3 | 3 | 462.8337 | FEFPVYAPK          | no  | GM364         |
| 0.9998 | QS20070709_P0149_HY109_05.01549.01549.3 | 3 | 501.8748 | MQHLEQTLNK         | no  | SPI1-6        |
| 1      | QS20070709_P0149_HY109_05.01550.01550.3 | 3 | 558.9172 | IGHGAEYGAELER      | no  | HBA-A1        |
| 0.9999 | QS20070709_P0149_HY109_05.01561.01561.3 | 3 | 429.1324 | LSVSVQVHK          | no  | SERPINA3K     |
| 0.9956 | QS20070709_P0149_HY109_05.01562.01562.3 | 3 | 497.8369 | ATFGCHETYK         | no  | APOH          |
| 0.9989 | QS20070709_P0149_HY109_05.01565.01565.3 | 3 | 429.1324 | LSVSVQVHK          | no  | SERPINA3K     |
| 0.3186 | QS20070709_P0149_HY109_05.01566.01566.3 | 3 | 422.798  | AVLVVHPDK          | no  | DNAJC6        |
| 0.1752 | QS20070709_P0149_HY109_05.01579.01579.3 | 3 | 483.5388 | HVPLIQPVEK         | no  | FETUB         |
| 0.9982 | QS20070709_P0149_HY109_05.01581.01581.3 | 3 | 451.7959 | NECFLQHK           | no  | ALB           |
| 0.9909 | QS20070709_P0149_HY109_05.01582.01582.3 | 3 | 508.865  | KVINDFVEK          | no  | SPI1-6        |
| 0.9906 | QS20070709_P0149_HY109_05.01587.01587.3 | 3 | 451.7959 | NECFLQHK           | no  | ALB           |
| 0.9917 | QS20070709_P0149_HY109_05.01593.01593.3 | 3 | 453.8263 | HLFTGPALSK         | YES | FAH           |
| 0.996  | QS20070709_P0149_HY109_05.01597.01597.3 | 3 | 453.8263 | HLFTGPALSK         | YES | FAH           |
| 0.9966 | QS20070709_P0149_HY109_05.01598.01598.3 | 3 | 424.4531 | LHVDPENFR          | no  | HBB-B1        |
| 0.9945 | QS20070709_P0149_HY109_05.01601.01601.3 | 3 | 392.7562 | VCLLHEK            | no  | ALB           |
| 0.1592 | QS20070709_P0149_HY109_05.01602.01602.3 | 3 | 452.4724 | SYFLHKK            | no  | UNKNOWN       |
| 0.9971 | QS20070709_P0149_HY109_05.01607.01607.3 | 3 | 546.8814 | WCAVSEHENTK        | no  | TF            |
| 0.9997 | QS20070709_P0149_HY109_05.01610.01610.3 | 3 | 511.8821 | KQTALAEVLK         | no  | ALB           |
| 0.9998 | QS20070709_P0149_HY109_05.01611.01611.3 | 3 | 610.9939 | SHCFTQAMMSQPK      | YES | PEMT          |
| 1      | QS20070709_P0149_HY109_05.01613.01613.3 | 3 | 482.2049 | VILGAHEEYIR        | YES | PLG           |
| 0.5313 | QS20070709_P0149_HY109_05.01619.01619.3 | 3 | 531.5336 | TNASLEVDAAENR      | no  | BPI           |
| 0.1322 | QS20070709_P0149_HY109_05.01621.01621.3 | 3 | 417.1029 | QCQFDICR           | no  | ZC3H7A        |
| 1      | QS20070709_P0149_HY109_05.01622.01622.3 | 3 | 482.2049 | VILGAHEEYIR        | YES | PLG           |
| 0.9993 | QS20070709_P0149_HY109_05.01625.01625.3 | 3 | 422.1225 | LFAYPDTHR          | YES | CAT           |
| 0.2286 | QS20070709_P0149_HY109_05.01645.01645.3 | 3 | 512.5756 | GGLFCSPLPGAGLR     | no  | 4930573119RIK |
| 0.5883 | QS20070709_P0149_HY109_05.01646.01646.3 | 3 | 708.7719 | SPEGPVSRVGATLPSRPK | no  | USP36         |
| 0.3789 | QS20070709_P0149_HY109_05.01647.01647.3 | 3 | 603.6457 | SPFSVGVSPSLDLK     | no  | FLNA          |
| 0.9865 | QS20070709_P0149_HY109_05.01653.01653.3 | 3 | 436.124  | SLHTLFGDK          | no  | ALB           |
| 0.5371 | QS20070709_P0149_HY109_05.01657.01657.3 | 3 | 509.5333 | WKEDVELYR          | no  | APOA1         |
| 0.9428 | QS20070709_P0149_HY109_05.01658.01658.3 | 3 | 436.124  | SLHTLFGDK          | no  | ALB           |
| 0.5609 | QS20070709_P0149_HY109_05.01659.01659.3 | 3 | 474.8551 | HPDLSTPELLR        | no  | AFM           |
| 0.4153 | QS20070709_P0149_HY109_05.01670.01670.3 | 3 | 465.851  | LTEVPALVHK         | no  | PZP           |
| 0.9999 | QS20070709_P0149_HY109_05.01673.01673.3 | 3 | 593.6388 | AFAQAQSHIFIEK      | no  | PZP           |
| 0.9998 | QS20070709_P0149_HY109_05.01677.01677.3 | 3 | 645.6703 | KPVDQYEDCYLAR      | YES | TF            |
| 0.7171 | QS20070709_P0149_HY109_05.01689.01689.3 | 3 | 401.7504 | LLGLSGXNK          | no  | SYNJ1         |
| 0.7812 | QS20070709_P0149_HY109_05.01714.01714.2 | 2 | 723.2582 | IQNILSEDPK         | YES | PON1          |
| 1      | QS20070709_P0149_HY109_05.01715.01715.3 | 3 | 701.7221 | SGAQTATWTEVSWPEK   | no  | HPXN          |

|        |                                         |   |          |                      |     |               |
|--------|-----------------------------------------|---|----------|----------------------|-----|---------------|
| 0.3348 | QS20070709_P0149_HY109_05.01718.01718.3 | 3 | 634.0412 | ANLQLESEELNILIR      | no  | 2610507B11RIK |
| 0.9704 | QS20070709_P0149_HY109_05.01725.01725.2 | 2 | 487.0546 | HELSSVIM             | YES | AQP9          |
| 1      | QS20070709_P0149_HY109_05.01730.01730.3 | 3 | 465.852  | VVAGVAAALAHK         | no  | HBB-B1        |
| 0.9999 | QS20070709_P0149_HY109_05.01731.01731.3 | 3 | 654.707  | TEVNTNHVLIYIEK       | no  | PZP           |
| 0.1718 | QS20070709_P0149_HY109_05.01735.01735.3 | 3 | 755.8725 | QTPLLLLVYMVTTGSGRDR  | no  | FOLR2         |
| 0.9988 | QS20070709_P0149_HY109_05.01739.01739.3 | 3 | 439.4802 | LFVLEEEHR            | YES | FTCD          |
| 1      | QS20070709_P0149_HY109_05.01741.01741.3 | 3 | 664.0753 | AHMVTLDYTVQVPGTGR    | YES | GNMT          |
| 0.9657 | QS20070709_P0149_HY109_05.01746.01746.2 | 2 | 658.7167 | LFVLEEEHR            | YES | FTCD          |
| 0.1603 | QS20070709_P0149_HY109_05.01759.01759.3 | 3 | 635.0518 | ETLQAMILQLQPTK       | no  | DISC1         |
| 0.9801 | QS20070709_P0149_HY109_05.01761.01761.3 | 3 | 534.9129 | HTTFEVLPEK           | YES | TF            |
| 1      | QS20070709_P0149_HY109_05.01781.01781.3 | 3 | 703.0855 | ANLMHNLGGEEVSVACK    | no  | AHSG          |
| 1      | QS20070709_P0149_HY109_05.01782.01782.3 | 3 | 830.1801 | NHYQAEVFSVNF AESEEAK | no  | SP11-6        |
| 0.2653 | QS20070709_P0149_HY109_05.01789.01789.3 | 3 | 796.9297 | MGPLDVWDLSPLLSLWMNR  | no  | TYW1          |
| 0.1506 | QS20070709_P0149_HY109_05.01817.01817.3 | 3 | 509.5433 | LEDIVTYHCSR          | YES | CFB           |
| 0.9991 | QS20070709_P0149_HY109_05.01821.01821.3 | 3 | 509.5433 | LEDIVTYHCSR          | YES | CFB           |
| 0.9997 | QS20070709_P0149_HY109_05.01822.01822.3 | 3 | 482.2049 | HPDYSVSLLLR          | no  | ALB           |
| 1      | QS20070709_P0149_HY109_05.01829.01829.3 | 3 | 564.2927 | YEALLTHETSIR         | YES | FGG           |
| 0.9319 | QS20070709_P0149_HY109_05.01841.01841.3 | 3 | 478.1767 | LCENIAGHLK           | YES | CAT           |
| 0.8507 | QS20070709_P0149_HY109_05.01843.01843.3 | 3 | 629.3419 | INGEWHTILASDK        | no  | MUP2          |
| 0.9999 | QS20070709_P0149_HY109_05.01849.01849.3 | 3 | 581.5978 | GTFASLSELHCDK        | no  | HBB-B1        |
| 0.2302 | QS20070709_P0149_HY109_05.01851.01851.2 | 2 | 617.1339 | NQVVEDLK             | no  | DAAM2         |
| 0.9784 | QS20070709_P0149_HY109_05.01853.01853.2 | 2 | 777.8181 | GFSQSLSVQWDR         | YES | AZGP1         |
| 0.9984 | QS20070709_P0149_HY109_05.01857.01857.3 | 3 | 581.5978 | GTFASLSELHCDK        | no  | HBB-B1        |
| 0.7899 | QS20070709_P0149_HY109_05.01866.01866.3 | 3 | 596.301  | LQCCDKPLLK           | no  | ALB           |
| 0.9933 | QS20070709_P0149_HY109_05.01878.01878.3 | 3 | 596.301  | LQCCDKPLLK           | no  | ALB           |
| 0.7697 | QS20070709_P0149_HY109_05.01882.01882.3 | 3 | 596.301  | LQCCDKPLLK           | no  | ALB           |
| 1      | QS20070709_P0149_HY109_05.01909.01909.3 | 3 | 544.5789 | DLQILAEFHEK          | no  | SERPINA3K     |
| 1      | QS20070709_P0149_HY109_05.01913.01913.3 | 3 | 544.5789 | DLQILAEFHEK          | no  | SERPINA3K     |
| 0.9999 | QS20070709_P0149_HY109_05.01921.01921.3 | 3 | 721.1099 | RPCFSALTVDETYVVK     | no  | ALB           |
| 0.999  | QS20070709_P0149_HY109_05.01925.01925.3 | 3 | 604.9751 | IGEGSTGIVCIATEK      | no  | PAK7          |
| 0.4389 | QS20070709_P0149_HY109_05.01938.01938.3 | 3 | 572.5735 | ENYNWSSNSSARR        | no  | COL17A1       |
| 0.9999 | QS20070709_P0149_HY109_05.01945.01945.3 | 3 | 750.8132 | AMGDYLVGVHTDEEIAK    | YES | PCYT2         |
| 0.9998 | QS20070709_P0149_HY109_05.01949.01949.3 | 3 | 621.2863 | ECCHGDLLCADDR        | no  | ALB           |
| 1      | QS20070709_P0149_HY109_05.01961.01961.3 | 3 | 626.6685 | FLGVAEQLHNEGFK       | YES | CPS1          |
| 0.5444 | QS20070709_P0149_HY109_05.01999.01999.2 | 2 | 727.2492 | NQNIINACTK           | no  | SEMA6A        |
| 0.5212 | QS20070709_P0149_HY109_05.02011.02011.3 | 3 | 481.8553 | MEELTAFVSK           | no  | SHOX2         |
| 0.9106 | QS20070709_P0149_HY109_05.02018.02018.2 | 2 | 674.7812 | PYLLISTQIR           | no  | GCHFR         |
| 0.9998 | QS20070709_P0149_HY109_05.02025.02025.3 | 3 | 626.6685 | FLGVAEQLHNEGFK       | YES | CPS1          |
| 0.6839 | QS20070709_P0149_HY109_05.02030.02030.2 | 2 | 692.2604 | EYVLPSEFVR           | YES | C3            |
| 0.1414 | QS20070709_P0149_HY109_05.02059.02059.2 | 2 | 639.1647 | AAGHTGPLHK           | no  | ACE           |
| 1      | QS20070709_P0149_HY109_05.02083.02083.3 | 3 | 591.6321 | CSPDPGLTALLSDHR      | no  | HPXN          |
| 0.9925 | QS20070709_P0149_HY109_05.02094.02094.3 | 3 | 626.6685 | FLGVAEQLHNEGFK       | YES | CPS1          |
| 1      | QS20070709_P0149_HY109_05.02095.02095.3 | 3 | 658.0642 | GVTSVSVQIFHSPDLAIR   | no  | SERPING1      |
| 0.9146 | QS20070709_P0149_HY109_05.02102.02102.2 | 2 | 545.6222 | LCAIPNLR             | no  | ALB           |
| 0.9986 | QS20070709_P0149_HY109_05.02126.02126.3 | 3 | 725.4274 | AETFTFHSDICTLPEK     | no  | ALB           |
| 0.9549 | QS20070709_P0149_HY109_05.02145.02145.2 | 2 | 578.1581 | YVIEFIAR             | no  | KNG1          |
| 0.1916 | QS20070709_P0149_HY109_05.02169.02169.3 | 3 | 810.1805 | GCEVTPDVNISGQKFNK    | no  | PLEKHC1       |
| 1      | QS20070709_P0149_HY109_05.02209.02209.3 | 3 | 699.3895 | DIAFEVEDCDHIVQK      | YES | HPD           |
| 1      | QS20070709_P0149_HY109_05.02210.02210.3 | 3 | 682.7329 | VITAFNDGLNHLDSLK     | no  | HBB-B1        |

|        |                                         |   |          |                         |     |           |
|--------|-----------------------------------------|---|----------|-------------------------|-----|-----------|
| 0.1847 | QS20070709_P0149_HY109_05.02214.02214.2 | 2 | 657.7072 | FVIDCEIER               | no  | GRIA4     |
| 0.8357 | QS20070709_P0149_HY109_05.02253.02253.3 | 3 | 705.0868 | TDYDNFLMAHLINEK         | no  | UNKNOWN   |
| 1      | QS20070709_P0149_HY109_05.02278.02278.3 | 3 | 586.6307 | DLEIEEVLHFK             | YES | CFB       |
| 0.3403 | QS20070709_P0149_HY109_05.02309.02309.3 | 3 | 525.5763 | AVGTQALSGAGLLK          | no  | SNX1      |
| 0.7016 | QS20070709_P0149_HY109_05.02319.02319.3 | 3 | 567.2543 | DEELSCSVLELK            | no  | SERPINA3K |
| 0.9638 | QS20070709_P0149_HY109_05.02322.02322.3 | 3 | 567.2543 | DEELSCSVLELK            | no  | SERPINA3K |
| 0.3308 | QS20070709_P0149_HY109_05.02330.02330.3 | 3 | 595.6657 | QDPHASPLVQVVR           | no  | ANGPTL1   |
| 0.9898 | QS20070709_P0149_HY109_05.02337.02337.3 | 3 | 598.6271 | ENEFFIVTQTCK            | no  | KNG1      |
| 0.8963 | QS20070709_P0149_HY109_05.02338.02338.2 | 2 | 614.6838 | SGYVFELLR               | no  | HRG       |
| 0.4002 | QS20070709_P0149_HY109_05.02365.02365.3 | 3 | 852.5859 | GLTFSIGGQISIDVFPEGWDK   | no  | PMM2      |
| 0.9999 | QS20070709_P0149_HY109_05.02399.02399.3 | 3 | 789.1913 | AVTHVGMDESEIIFVDWK      | no  | ORM1      |
| 0.2383 | QS20070709_P0149_HY109_05.02457.02457.3 | 3 | 797.2054 | EYQLEGVNWLFLNWNR        | no  | CHD8      |
| 0.5684 | QS20070709_P0149_HY109_05.02470.02470.3 | 3 | 592.3296 | NSMIVSPSQPEMGR          | no  | TMED7     |
| 0.9999 | QS20070709_P0149_HY109_05.02481.02481.3 | 3 | 789.1913 | AVTHVGMDESEIIFVDWK      | no  | ORM1      |
| 0.845  | QS20070709_P0149_HY109_05.02505.02505.3 | 3 | 484.5287 | TMEIELEGLK              | no  | SERPINA3K |
| 0.2976 | QS20070709_P0149_HY109_05.02521.02521.3 | 3 | 778.1942 | ICPKPDDLFPFATVVPLK      | no  | APOH      |
| 0.164  | QS20070709_P0149_HY109_05.02522.02522.2 | 2 | 730.289  | TGTWSFLPTCR             | no  | APOH      |
| 0.8203 | QS20070709_P0149_HY109_05.02571.02571.3 | 3 | 889.921  | LEEVPGGQRPEAGRPASEAADGK | no  | MAGI2     |
| 1      | QS20070709_P0149_HY109_05.02591.02591.3 | 3 | 766.1617 | YGCETADQLHILNEVPR       | no  | C8G       |
| 1      | QS20070709_P0149_HY109_05.02599.02599.3 | 3 | 869.6125 | LFQEEFPGIPYPPDAAVECHR   | no  | HPXN      |
| 1      | QS20070709_P0149_HY109_05.02601.02601.3 | 3 | 869.6125 | LFQEEFPGIPYPPDAAVECHR   | no  | HPXN      |
| 0.9999 | QS20070709_P0149_HY109_05.02610.02610.3 | 3 | 850.9095 | DQSPASHEIATNLGDFAIISLYR | no  | SPI1-6    |
| 0.8853 | QS20070709_P0149_HY109_05.02657.02657.3 | 3 | 850.9095 | DQSPASHEIATNLGDFAIISLYR | no  | SPI1-6    |
| 0.9878 | QS20070709_P0149_HY109_05.02758.02758.2 | 2 | 689.2595 | AYVAFPDFFR              | no  | MGAM      |
| 0.9792 | QS20070709_P0149_HY109_05.02841.02841.2 | 2 | 753.3735 | STMVEDLVVLR             | no  | C8B       |
| 1      | QS20070709_P0149_HY109_05.03017.03017.2 | 2 | 877.9569 | DVFLGTFLYEYSR           | no  | ALB       |
| 0.95   | QS20070709_P0149_HY109_05.03018.03018.2 | 2 | 877.9569 | DVFLGTFLYEYSR           | no  | ALB       |
| 1      | QS20070709_P0149_HY109_05.04169.04169.2 | 2 | 1293.939 | VPTANLENVPLAEDFTEILSR   | no  | GC        |

## Table S5. Summary

**Table S5. Liver-injury plasma analysis with three platforms.** Plasma protein-level changes 24-hours after liver injury were analyzed by SPR array Set A and Set B, by iTRAQ, and by immunoblotting. SPR p-values are calculated for four technical replicates. Note that albumin (ALB) and transferrin (TF) were depleted from plasma samples before MS analysis. MS p-values are for statistical significance of the fold changes of the target proteins as compared with all of the detected proteins in the pooled serum samples. Both SPR and MS results are  $\log_2$  ratios of liver-injury relative to control. Immunoblot results are qualitative values indicating where obvious increases (Up) or decreases (Down) have occurred following liver injury.

| Gene symbol | SPR Set A    | P-value | SPR Set B    | P-value | iTRAQ target | iTRAQ | P-value | Immunoblot       |
|-------------|--------------|---------|--------------|---------|--------------|-------|---------|------------------|
| ADH4        | ...          | ...     | No signal    | ...     | Yes          | 2     | 0.0658  | No signal        |
| AFM         | No change    | ...     | ...          | ...     | No           | -0.33 | 0.3335  | Off predicted MW |
| AGXT        | ...          | ...     | ...          | ...     | No           | ...   | ...     | Up               |
| AHCY        | ...          | ...     | ...          | ...     | No           | ...   | ...     | Off predicted MW |
| AHSG        | ...          | ...     | ...          | ...     | No           | -1.02 | 0.1637  | Weak signal      |
| ALDH1L1     | ...          | ...     | ...          | ...     | No           | ...   | ...     | Up               |
| ALDOB       | No signal    | ...     | 0.96 ± 0.33  | 0.0101  | Yes          | 1.93  | 0.0756  | Up               |
| AMBP        | ...          | ...     | ...          | ...     | No           | 1.36  | 0.1901  | Off predicted MW |
| AQP9        | No signal    | ...     | No signal    | ...     | Yes          | -0.22 | 0.3551  | No signal        |
| ARG1        | No signal    | ...     | No signal    | ...     | No           | 0.43  | 0.3894  | No signal        |
| ASGR1       | 2.33 ± 0.80  | 0.0101  | 2.22 ± 0.53  | 0.0036  | Yes          | -0.23 | 0.3541  | Up               |
| ASGR2       | 2.89 ± 0.59  | 0.0022  | 2.29 ± 0.45  | 0.002   | Yes          | 1.88  | 0.0839  | Up               |
| ASL         | No signal    | ...     | No signal    | ...     | Yes          | 1.92  | 0.0773  | Up               |
| ASS1        | ...          | ...     | ...          | ...     | Yes          | -0.3  | 0.339   | No signal        |
| BAAT        | ...          | ...     | ...          | ...     | No           | ...   | ...     | Off predicted MW |
| BHMT        | ...          | ...     | ...          | ...     | No           | 3.07  | 0.0039  | Up               |
| COMT        | ...          | ...     | ...          | ...     | No           | ...   | ...     | Up               |
| CP          | -0.12 ± 0.23 | 0.3579  | -2.74 ± 2.64 | 0.1301  | Yes          | -1.28 | 0.1748  | Down             |
| CPS1        | No signal    | ...     | 0.19 ± 0.11  | 0.0442  | Yes          | -1.77 | 0.0404  | Up               |
| DPYS        | No signal    | ...     | 1.14 ± 0.2   | 0.0015  | No           | 0.97  | 0.2921  | Up               |
| ECH1        | ...          | ...     | ...          | ...     | No           | ...   | ...     | No signal        |
| FAH         | ...          | ...     | ...          | ...     | Yes          | 1.96  | 0.0718  | Up               |
| FBP1        | ...          | ...     | ...          | ...     | No           | 1.82  | 0.0929  | Up               |
| FGA         | No change    | ...     | 0.01 ± 0.36  | 0.9411  | Yes          | 1.02  | 0.2778  | Off predicted MW |
| FGL1        | No signal    | ...     | No signal    | ...     | No           | ...   | ...     | Off predicted MW |
| FTCD        | ...          | ...     | ...          | ...     | Yes          | -1.88 | 0.0308  | Weak signal      |
| GCDH        | ...          | ...     | ...          | ...     | Yes          | -1.29 | 0.1057  | Off predicted MW |
| GJB1        | ...          | ...     | ...          | ...     | No           | ...   | ...     | No signal        |
| GLS2        | ...          | ...     | ...          | ...     | No           | ...   | ...     | No signal        |
| GNMT        | ...          | ...     | 1.1 ± 0.54   | 0.0263  | Yes          | 1.12  | 0.2527  | Up               |
| HAAO        | ...          | ...     | ...          | ...     | No           | ...   | ...     | Off predicted MW |
| HAL         | ...          | ...     | ...          | ...     | No           | ...   | ...     | No signal        |
| HMGCS2      | 1.70 ± 0.68  | 0.0154  | 2.67 ± 0.67  | 0.004   | No           | ...   | ...     | Up               |

|           |              |        |              |        |     |       |        |                  |
|-----------|--------------|--------|--------------|--------|-----|-------|--------|------------------|
| HP        | ...          | ...    | 1.52 ± 1.23  | 0.0897 | No  | ...   | ...    | No change        |
| HPD       | ...          | ...    | ...          | ...    | Yes | 2.37  | 0.0283 | Up               |
| HPX       | ...          | ...    | No signal    | ...    | No  | -1.88 | 0.031  | No signal        |
| KHK       | ...          | ...    | ...          | ...    | No  | ...   | ...    | No signal        |
| KNG1      | ...          | ...    | -0.37 ± 0.54 | 0.2621 | No  | -0.85 | 0.2039 | Off predicted MW |
| MAT1A     | ...          | ...    | ...          | ...    | No  | ...   | ...    | Up               |
| MST1      | No signal    | ...    | No signal    | ...    | No  | ...   | ...    | Off predicted MW |
| PLG       | -0.89 ± 0.43 | 0.0255 | -0.93 ± 0.37 | 0.0154 | Yes | -1.04 | 0.1574 | Down             |
| PON1      | No signal    | ...    | No signal    | ...    | Yes | 1.66  | 0.1223 | Off predicted MW |
| RBP4      | No signal    | ...    | -0.54 ± 0.33 | 0.0452 | No  | ...   | ...    | Down             |
| TDO2      | ...          | ...    | ...          | ...    | No  | ...   | ...    | No signal        |
| TF        | -0.34 ± 0.15 | 0.02   | -0.28 ± 0.16 | 0.0416 | Yes | -1.2  | 0.1234 | Down             |
| TFR2      | No signal    | ...    | No signal    | ...    | No  | ...   | ...    | No signal        |
| UPB1      | ...          | ...    | ...          | ...    | No  | ...   | ...    | Off predicted MW |
| ALB*      | -0.27 ± 0.60 | 0.4397 | 0.31 ± 0.78  | 0.4847 | No  | ...   | ...    | No change        |
| ALT/GPT1* | ...          | ...    | No signal    | ...    | No  | 1.56  | 0.145  | Up               |
| AST/GOT1* | ...          | ...    | No signal    | ...    | No  | ...   | ...    | Up               |
| GLUD1*    | ...          | ...    | ...          | ...    | No  | ...   | ...    | Up               |

\*Indicates conventional liver injury biomarkers.

**Table S6. Dose response**

**Table S6. Putative liver injury biomarker concentration in mouse plasma after low dosage and high dosage APAP treatment.** Five concentrations are noticeably elevated after the low dosage and eight are elevated after the high dosage. All eight concentrations are significantly correlated to APAP treatment, based on P-values calculated by one-way ANOVA. Concentrations are in units of  $\mu\text{g/ml}$ .

| Sample           | FBP1           | GNMT           | HPD            | MAT1A          | ALDH1L1        | CPS1            | BHMT             | FAH               |
|------------------|----------------|----------------|----------------|----------------|----------------|-----------------|------------------|-------------------|
| Control          | 1.7 $\pm$ 1.2  | 1.2 $\pm$ 1.0  | 3.8 $\pm$ 3.3  | 2.1 $\pm$ 0.6  | 1.7 $\pm$ 0.8  | 1.5 $\pm$ 1.1   | 1.3 $\pm$ 0.9    | 1.4 $\pm$ 1.2     |
| APAP(150 mg/kg)  | 1.7 $\pm$ 1.3  | 0.8 $\pm$ 0.5  | 6.0 $\pm$ 0.6  | 7.8 $\pm$ 2.4  | 0.9 $\pm$ 0.8  | 7.8 $\pm$ 2.5   | 15.5 $\pm$ 15.9  | 182.6 $\pm$ 17.8  |
| APAP (300 mg/kg) | 11.3 $\pm$ 0.4 | 20.7 $\pm$ 4.9 | 20.7 $\pm$ 1.0 | 19.9 $\pm$ 6.9 | 60.4 $\pm$ 3.3 | 194.7 $\pm$ 4.2 | 226.7 $\pm$ 55.3 | 677.7 $\pm$ 132.8 |
| P-value          | 0.00004        | 0.00060        | 0.00001        | 0.00590        | 0.00000        | 0.00000         | 0.00027          | 0.00010           |



**Table S7. Temporal profile of 11 transcripts in mouse liver lysate after APAP treatment**

We performed mouse liver transcriptome analysis by GeneChip® Mouse Gene 2.0 ST Array (Affymetrix, CA). The eight time points were taken after high-dosage (300 mg/kg) APAP treatment. The transcript profile of the 11 candidate markers was similar to the protein profile.

| gene_symbol | 0hr      | 1hr      | 3hr      | 12hr     | 24hr     | 48hr     | 72hr     | 120hr    |
|-------------|----------|----------|----------|----------|----------|----------|----------|----------|
| agxt        | 15272.51 | 17737.53 | 19323.57 | 15198.36 | 9449.00  | 5581.28  | 15988.59 | 26479.55 |
| aldh1l1     | 24304.26 | 23040.66 | 20000.04 | 6353.53  | 9206.66  | 4265.65  | 13099.27 | 23192.66 |
| bhmt        | 43521.19 | 32184.41 | 32841.95 | 1836.29  | 6084.21  | 2012.53  | 6851.18  | 16692.66 |
| comt        | 2558.23  | 1675.03  | 1411.80  | 1336.29  | 3793.39  | 3309.40  | 2274.84  | 6614.79  |
| cps1        | 27502.67 | 29550.03 | 18448.57 | 2224.22  | 13994.92 | 3678.15  | 19625.99 | 12459.06 |
| dpys        | 4976.22  | 4293.78  | 5628.72  | 793.19   | 1357.17  | 250.03   | 2656.52  | 2995.94  |
| fah         | 3888.92  | 2850.03  | 3080.92  | 819.05   | 2538.29  | 1212.53  | 2309.19  | 3450.86  |
| fbp1        | 59478.86 | 59887.53 | 43000.04 | 7525.94  | 28033.19 | 16687.53 | 16087.82 | 52377.09 |
| gnmt        | 56571.46 | 54487.53 | 56305.18 | 4732.84  | 24943.90 | 11459.41 | 22194.69 | 44954.96 |
| hpd         | 21468.28 | 14943.78 | 14257.39 | 1051.81  | 3433.70  | 665.65   | 4480.95  | 12372.99 |
| mat1a       | 51791.03 | 34950.03 | 43003.71 | 4353.53  | 24267.88 | 14759.41 | 15194.69 | 11028.73 |
